# Supplementary material
Source: PubMed Central journal article supplement (PMC4528056)
Supplement: cr201582x1.pdf [file cr201582x1.pdf]

## **Materials and Methods**

### **Cell culture**

MHCC-LM3, HeLa, MCF-7, SMCC-7721, MGC-803 and HEK-293T cells were cultured in Dulbecco's modified Eagle's medium (DMEM) supplemented with 10% fetal bovine serum (FBS) and 1% penicillin-streptomycin solution. HCT-116 was grown in McCoy's 5A Modified medium with 10% FBS and 1% penicillin-streptomycin solution. NCI-H1299 was cultured in RPMI-1640 supplemented with 10% FBS and antibiotics.

### **Exosomes isolation**

To isolate cell-derived exosomes, cells were cultured in serum-free medium for 24 h. Then the medium was collected to extract exosomes using differential ultracentrifugation methods essentially as described in the literature<sup>1</sup>. Briefly, medium was centrifuged at 500xg for 5 min, 2000xg for 5 min, and finally at 4600xg for 20 min at 4°C to remove cells and debris; and eventually ultracentrifuged at 134,000xg for 70 min at 4°C using a Beckman ultracentrifuge. For serum samples, the exosomes were isolated using Total Exosome Isolation (from serum) (Invitrogen, Carlsbad, CA, USA) following the manufacturer's protocol. The isolated exosomes were eluted in PBS and used immediately or stored at -80°C.

### **Transmission electron microscopy (TEM)**

The exosomes were separated by ultracentrifugation and the pellet was resuspended in PBS. One drop of the resuspended exosomes was put on a copper mesh for 1min. The fluid was then absorbed from the edges of the copper mesh with filter paper. The copper mesh was stained with 1% uranyl acetate in ddH<sub>2</sub>O for 1min. The sample was dried for 5 min under incandescent light

after the staining solution was absorbed by the filter paper. The copper mesh was placed under transmission electron microscope (FEI, Tecnai G2 spirit) and photographed.

**RNA-seq analysis**

Total RNA was extracted using TRIzol or TRIzol LS Reagent (Invitrogen). Poly(A) RNA was purified with two rounds of hybridization to Dynaloligo(dT) beads (NEB). Total RNA and exosomal RNA samples were treated with RiboMinus™ Eukaryote Kit (Qiagen) to remove ribosomal RNA before constructing RNA-seq libraries. Ribosome depleted RNA was treated with RNase R (Epicentre) for RNA-seq analysis of RNase R treated samples. Strand-specific RNA-seq libraries were prepared using NEBNext Ultra Directional RNA Library Prep Kit for Illumina (NEB) following the manufacturer's instructions. Briefly, RNA samples (about 50 ng) were fragmented and then used for first- and second-strand cDNA synthesis with random hexamer primers. For second-strand cDNA synthesis, dUTP mix (without dTTP) was used which allows for the removal of the second strand. The cDNA fragments were treated with End-It DNA End Repair Kit to repair the ends, then modified with Klenow to add an A at the 3' end of the DNA fragments, and finally ligated to adapters. Ligated cDNA products were purified and treated with uracil DNA glycosylase to remove the second-strand cDNA. Purified first-strand cDNA was subjected to 14 cycles of PCR amplification. Library quality was determined on Bioanalyzer 2100 (Agilent).

The strand-specific RNA-seq libraries were sequenced using IlluminaHiSeq 2500 platform. Reads were mapped to human reference genome GRCh37/hg19 using TopHat v2.0.8b<sup>2</sup>. Similar sequencing depths (45.0M reads for cells, 45.3M for cell-derived exosomes, 31.0M for normal serum exosomes, 40.8M for CRC serum exosomes) were achieved from different Ribo(-) RNA-seqs. RNase R treated samples were sequenced with a small depth (21.0M for cell sample and 3.5M for exosomes sample). Notably, the low sequencing depth of RNase R treated exosomes sample may be due to the more completed digestion of RNase R in exosomes sample as we found

similar number of circular RNAs identified from both RNase R treated samples though their sequencing depths are different. A computational pipeline<sup>3</sup> based on anchor alignment of unmapped reads was used to identify circRNAs. Briefly, The unmapped reads were extracted 20mers from both ends and aligned them independently to find unique anchor positions within spliced exons. Anchors that aligned in the reversed orientation (head-to-tail) indicated circRNA splicing. Then the anchor alignments were extended such that the complete read aligns and the breakpoints were flanked by GU/AG splice sites. Ambiguous breakpoints were discarded. Notably, we used TopHat2 but not Bowtie2 for RNA-seq reads mapping because we found some junction reads could not be mapped correctly to genome using Bowtie2 (Unpublished data). Counts of reads mapping across an identified backsplice are normalized by read length and number of reads mapping (spliced reads per billion mapping [SRPBM]). We calculated the number of reads mapping from all gene regions. Gene coordinates were downloaded from the RefGene tables in the UCSC Genome Browser (downloaded on 03/28/2014). The identified circRNAs from cells and cell-derived exosomes were calculated using SRPBM and represented using Circos plots<sup>4</sup>. The representative RNA-seq results for the HIPK3 gene and circ-HIPK3 (exon2) locus in various RNA-seq libraries were obtained using Integrative Genomics Viewer (IGV)<sup>5</sup>. The back-spliced ratio of circRNA and its linear transcript from RNA-seq was calculated as suggested below. For comparison of the exo-circRNA profile of normal serum and that of colon cancer serum, the commonly expressed circRNAs were considered with SRPBM>0.6 (at least one read in both library), while the specific expressed circRNAs were chosen using a stringency of SRPBM cut-off (SRPBM>6). The expression level of protein coding genes for the new circRNAs in CRC cancer patients was analyzed by 27 paired CRC samples from TCGA cohort.

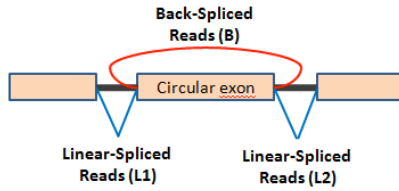

$$\text{Back-Spliced Ratio} = B / (0.5 \times L1 + 0.5 \times L2)$$

### Quantitative reverse transcription polymerase chain reaction (qRT-PCR)

cDNA was synthesized with the PrimeScript RT reagent kit (Takara Bio Inc., Dalian, China). Real-time PCR analyses were performed with SYBR Premix Ex Taq (Takara Bio Inc.). Outward facing primers were designed to amplify specific circRNAs (See below).  $\beta$ -actin was used as an internal control. The primers are listed in Supplementary Table S3.

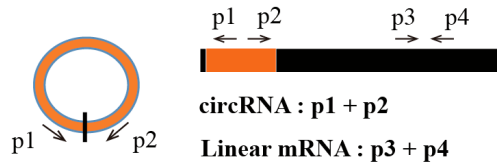

### Animal models

To analyze circulating exo-circRNA from cancer-bearing mice, BALB/c-nu/nu mice were subcutaneously implanted with  $4 \times 10^6$  MHCC-LM3 liver cancer cells. After 8 weeks, mice were sacrificed and peripheral blood was obtained by retro-orbital bleeding. Serum was separated from blood cells by sequential centrifugation at  $500 \times g$  for 10 min followed by  $3000 \times g$  for 20 min, and subjected to exosomal RNA isolation. Mice were handled and housed according to protocols approved by the Shanghai Medical Experimental Animal Care Commission.

### Serum collection and exosomal RNA extraction

Whole blood samples were obtained from tissue bank of Fudan University Shanghai Cancer Center. All people had signed informed consent for donating their samples to tissue bank of

Fudan University Shanghai Cancer Center. Whole blood was separated into serum and cellular fractions within 2 h after blood was derived, and serum were stored at  $-80^{\circ}\text{C}$ . Serum exosomes were isolated as indicated above. Exosomal RNA was extracted using TRIzol LS Reagent (Invitrogen) in the presence of glycogen.

**Cell transfection and cell proliferation assay**

miR-7 mimics were synthesized by Ribobio (Guangzhou, China). CDR1as expression vector was constructed by cloning CDR1as sequences into two complementary repeat elements driven by CMV promoter. The oligonucleotide or plasmid transfection was performed using the Lipofectamine 2000 reagent (Invitrogen). The cell-derived exosomes were collected 48 h after transfection.

For cell proliferation assay, miR-7 mimics or negative control were transfected into SMCC-7721 liver cancer cells in 96-well plate. After 4 h transfection, CDR1as exosomes or control exosomes were added to the transfected cells. The cells were subsequently incubated for 48 h, and cell proliferation was measured using the Cell Counting Kit-8 (CCK-8) (Dojindo Corp., Japan). CDR1as exosomes and control exosomes were collected from cell culture medium after transfection with CDR1as expression vector or control vector in HEK-293T cells. Notably, we performed the functional assay in SMCC-7721 liver cancer cell because miR-7 was reported to function as a tumor suppressor in liver cancer (Fang et al., *Hepatology*, 2012) and CDR1as circular RNA was found to be dysregulated in liver cancer tissues compared with matched normal tissues (data not shown). We conducted the experiment regarding the regulation of circular RNA sorting to exosomes by associated miRNA in HEK-293T and MCF-7 cells, because CDR1as circular RNA is highly expressed in both cells.

**Statistical analysis**

The results are presented as the means  $\pm$  S. D. The data were subjected to Student's t-test (two-tailed, with  $p < 0.05$  considered significant) or Pearson's correlation analysis.

**References**

1. They, C., Amigorena, S., Raposo, G. & Clayton, A. Isolation and characterization of exosomes from cell culture supernatants and biological fluids. *Curr Protoc Cell Biol* Chapter 3, Unit 3 22 (2006).
2. Trapnell, C., Pachter, L. & Salzberg, S.L. TopHat: discovering splice junctions with RNA-Seq. *Bioinformatics* 25, 1105-11 (2009).
3. Memczak, S. et al. Circular RNAs are a large class of animal RNAs with regulatory potency. *Nature* 495, 333-8 (2013).
4. Krzywinski, M. et al. Circos: an information aesthetic for comparative genomics. *Genome Res* 19, 1639-45 (2009).
5. Robinson, J.T. et al. Integrative genomics viewer. *Nat Biotechnol* 29, 24-6 (2011).

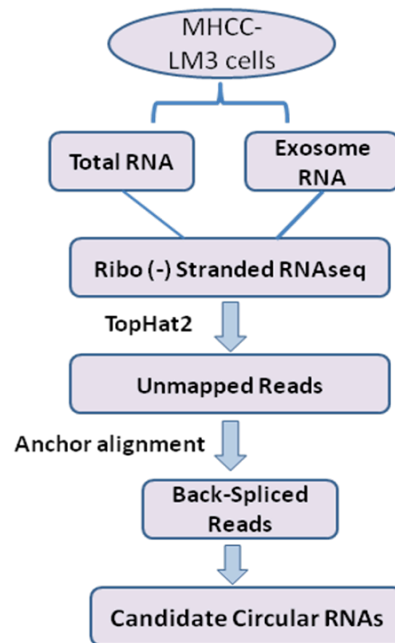

**Supplementary information, Figure S1** RNA-seq analysis of circular RNAs in MHCC-LM3 cells and cell-derived exosomes.

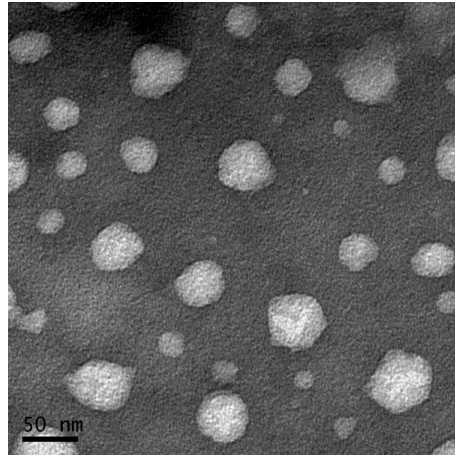

**Supplementary information, Figure S2** Transmission electron micrograph of exosomes isolated from MHCC-LM3 cells. The scale bar is 50 nm.



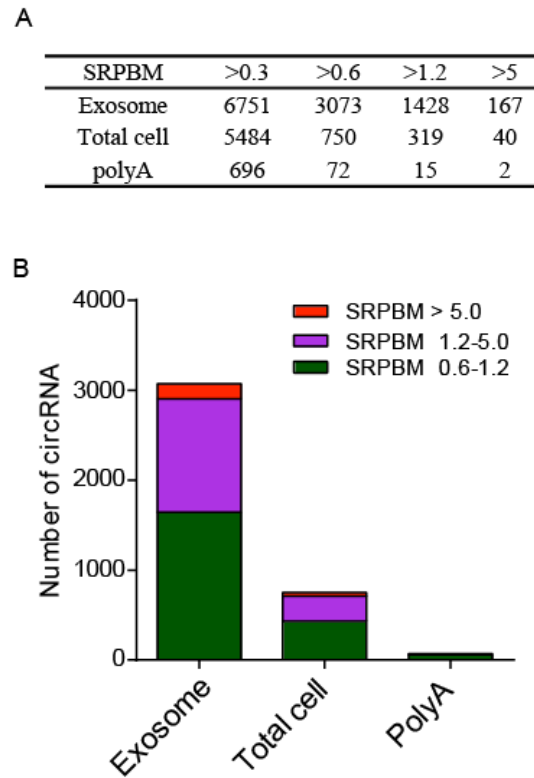

**Supplementary information, Figure S3** The number of circular RNAs identified from different RNA-seq libraries. When using a stringency of SRPBM cut-off, the number of exo-circRNA is significant higher than that of cellular circRNA, while circRNA is almost absent in polyA(+) RNAseq library.

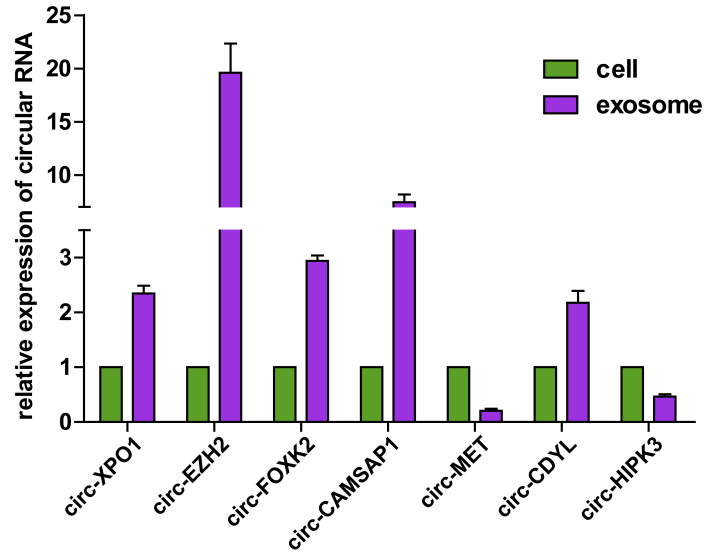

**Supplementary information, Figure S4** qRT-PCR analysis of seven circRNAs after reverse transcription (RT) on same amount of cellular RNA and exosomal RNA. The level in cell was set as 1. Data are presented as means  $\pm$  standard deviation (S.D). MET and HIPK3 circular RNAs are higher in cells than exosomes, while the other five circular RNAs are lower in cells than exosomes. Notably, the length of MET and HIPK3 circular RNAs is much longer than that of others (circ-MET 1,214nt, circ-HIPK3 1,099nt, circ-CDYL 667nt, circ-CAMSAP1 426nt, circ-EZH2 355nt, circ-FOXK2 346nt, circ-XPO1 307nt), suggesting that the length of circular RNA might be linked to the regulation of circRNA sorting into exosomes.

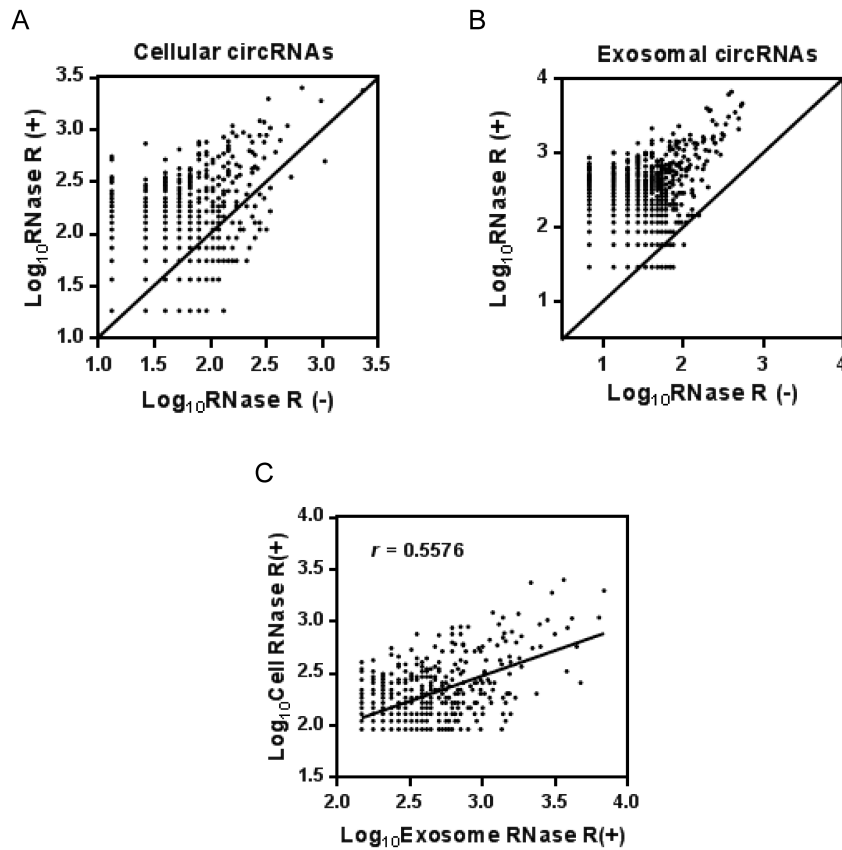

**Supplementary information, Figure S5** RNA-seq analysis of circRNAs in MHCC-LM3 cells and cell-derived exosomes with or without RNase R treatment. **(A)** circRNAs are enriched in MHCC-LM3 cells with RNase R treatment compared with cells without RNase R treatment. **(B)** circRNAs are enriched in MHCC-LM3 cell-derived exosomes with RNase R treatment compared with exosomes without RNase R treatment. **(C)** Correlation between cellular circRNAs and exo-circRNAs after RNase R treatment.

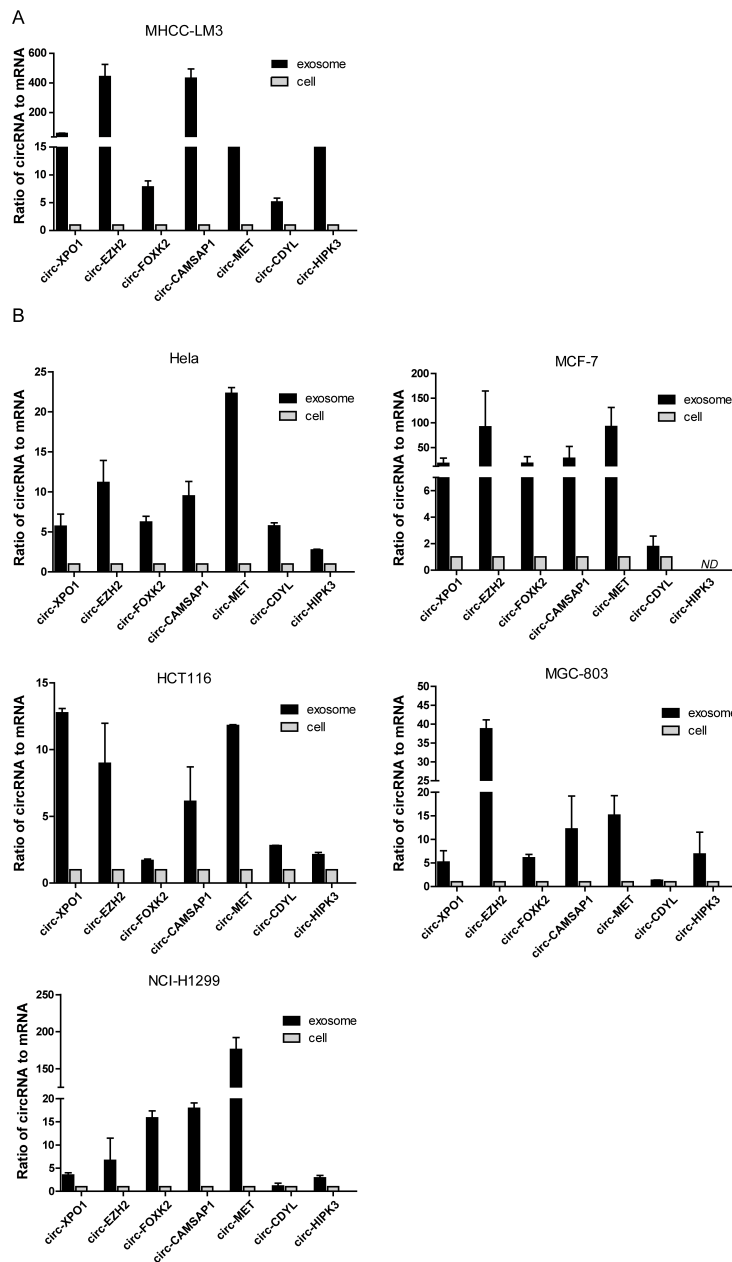

**Supplementary information, Figure S6** qRT-PCR analysis the ratio of circRNA to mRNA between cells and cell-derived exosomes. **(A)** qRT-PCR analysis the ratio of circRNA to mRNA between MHCC-LM3 cells and cell-derived exosomes. **(B)** qRT-PCR analysis the ratio of circRNA to mRNA between cells and cell-derived exosomes in various cancer cells. The ratio in cell was set as 1. Data are presented as means  $\pm$  standard deviation (S.D). *ND* represents not determined.

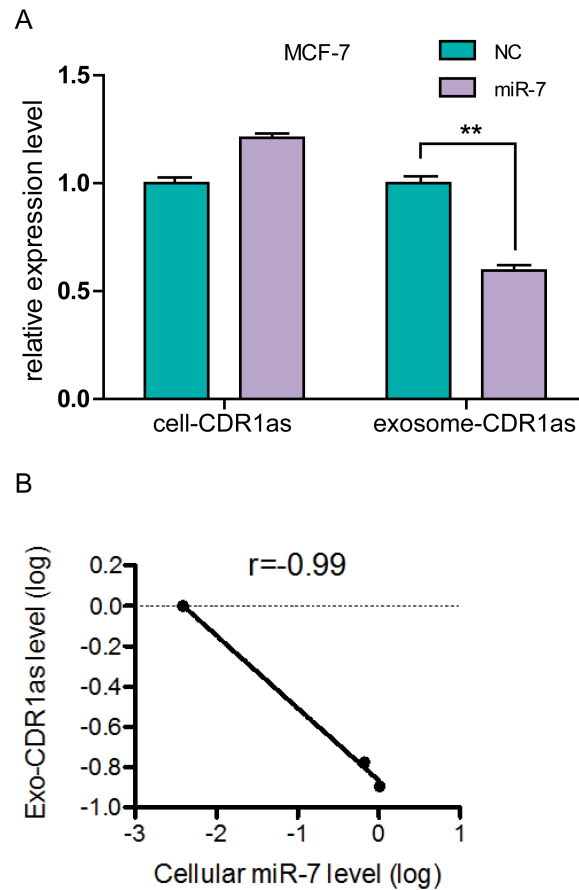

**Supplementary information, Figure S7 (A)** qRT-PCR analysis of CDR1as circular RNA expression level after transfection with control or miR-7 mimics in MCF-7 cells and cell-derived exosomes. Data are presented as means±S.D. \*\*P<0.01, by Student's t-test. **(B)** The relationship between the amount of miR-7 expressed in cells and the levels of CDR1as circular RNA in the exosomes generated by the cells. HEK293T cells were transfected with different amount of miR-7 mimics. The levels of miR-7 in cells and CDR1as circular RNA in the exosomes were determined by qRT-PCR analysis. Data was plotted and Pearson correlation was analyzed. The result showed that there was an inverse relationship between the amount of miRNAs expressed in cells and the levels of circRNAs in the exosomes generated by the cells.

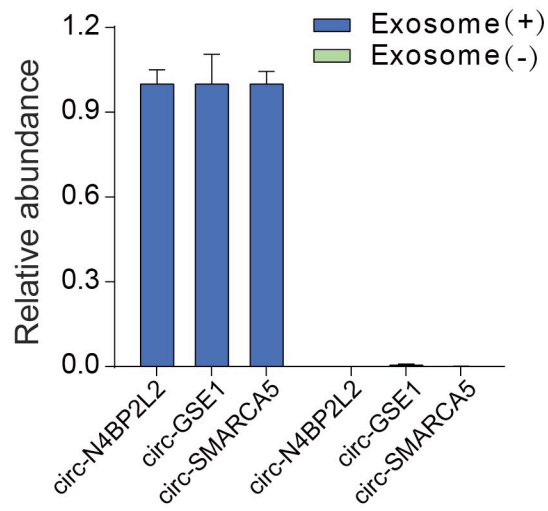

**Supplementary information, Figure S8** qRT-PCR analysis of three circRNAs in serum-derived exosomes and exosomes-depleted serum. The level in serum-derived exosomes was set as 1. Data are presented as means $\pm$ S.D. Notably, the exosomes-depleted serum did not contain microvesicles. Thus, herein we could not exclude the possibility of circRNAs being present in microvesicles.

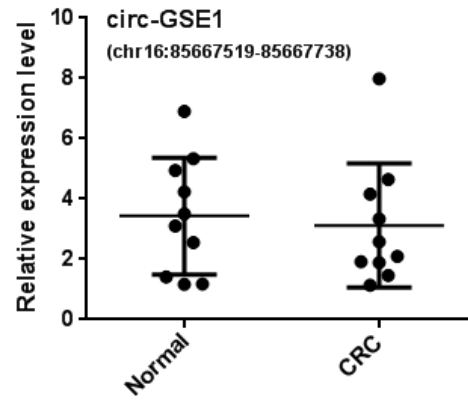

**Supplementary information, Figure S9** qRT-PCR analysis of serum circ-GSE1 level in normal serum and colon cancer serum (n=10, respectively). Serum expression level of circ-GSE1 is not significantly different between cancer serum and NS ( $P>0.05$  by Student's *t*-test).

Supplementary information, Table S1 Human serum exosomal circular RNAs

| Chr  | Start    | End      | Strand | circRNA ID      | SRPBM | Genomic length | Spliced length | Gene symbol | Annotation     |
|------|----------|----------|--------|-----------------|-------|----------------|----------------|-------------|----------------|
| chr1 | 1158623  | 1159348  | -      | Serum_circ_0001 | 1.43  | 725            | 251            | SDF4        | CDS,Exon       |
| chr1 | 1747194  | 1770677  | -      | Serum_circ_0002 | 2.14  | 23483          | 298            | GNB1        | CDS,Exon,5'UTR |
| chr1 | 4709430  | 4709610  | -      | Serum_circ_0003 | 4.29  | 180            | NA             | NA          | Intergenic     |
| chr1 | 6867042  | 6948959  | +      | Serum_circ_0004 | 4.29  | 81917          | 1112           | CAMTA1      | CDS,Exon,5'UTR |
| chr1 | 6880240  | 6948959  | +      | Serum_circ_0005 | 5.00  | 68719          | 1112           | CAMTA1      | CDS,Exon,5'UTR |
| chr1 | 6880240  | 6885270  | +      | Serum_circ_0006 | 3.57  | 5030           | 189            | CAMTA1      | CDS,Exon,5'UTR |
| chr1 | 6880240  | 6894050  | +      | Serum_circ_0007 | 1.43  | 13810          | 189            | CAMTA1      | CDS,Exon,5'UTR |
| chr1 | 7837219  | 7838229  | +      | Serum_circ_0008 | 17.87 | 1010           | 211            | VAMP3       | CDS,Exon       |
| chr1 | 8601272  | 8617582  | -      | Serum_circ_0009 | 1.43  | 16310          | 308            | RERE        | CDS,Exon       |
| chr1 | 9991948  | 9994918  | -      | Serum_circ_0010 | 3.57  | 2970           | 277            | LZIC        | CDS,Exon       |
| chr1 | 12460237 | 12476880 | +      | Serum_circ_0011 | 6.43  | 16643          | 699            | VPS13D      | CDS,Exon       |
| chr1 | 12638745 | 12640694 | -      | Serum_circ_0012 | 4.29  | 1949           | 570            | DHRS3       | CDS,Exon,3'UTR |
| chr1 | 15860731 | 15863309 | +      | Serum_circ_0013 | 5.00  | 2578           | 407            | DNAJC16     | CDS,Exon,5'UTR |
| chr1 | 17668437 | 17668897 | +      | Serum_circ_0014 | 2.86  | 460            | 283            | PADI4       | CDS,Exon       |
| chr1 | 21083658 | 21100103 | -      | Serum_circ_0015 | 2.14  | 16445          | 631            | HP1BP3      | CDS,Exon       |
| chr1 | 21091869 | 21100103 | -      | Serum_circ_0016 | 2.14  | 8234           | 540            | HP1BP3      | CDS,Exon       |
| chr1 | 21097422 | 21100103 | -      | Serum_circ_0017 | 3.57  | 2681           | 304            | HP1BP3      | CDS,Exon       |
| chr1 | 21137230 | 21139732 | -      | Serum_circ_0018 | 4.29  | 2502           | 229            | EIF4G3      | CDS,Exon       |
| chr1 | 21231375 | 21268823 | -      | Serum_circ_0019 | 1.43  | 37448          | 1080           | EIF4G3      | CDS,Exon,3'UTR |
| chr1 | 21306826 | 21307720 | -      | Serum_circ_0020 | 2.14  | 894            | 295            | EIF4G3      | CDS,Exon       |
| chr1 | 21327691 | 21329301 | -      | Serum_circ_0021 | 2.14  | 1610           | 96             | EIF4G3      | CDS,Exon,5'UTR |
| chr1 | 21377358 | 21386287 | -      | Serum_circ_0022 | 1.43  | 8929           | 129            | EIF4G3      | Exon,5'UTR     |
| chr1 | 21377358 | 21437876 | -      | Serum_circ_0023 | 5.00  | 60518          | 266            | EIF4G3      | Exon,5'UTR     |
| chr1 | 21548239 | 21554534 | -      | Serum_circ_0024 | 2.86  | 6295           | 466            | ECE1        | CDS,Exon       |
| chr1 | 22041881 | 22048257 | -      | Serum_circ_0025 | 1.43  | 6376           | 315            | USP48       | CDS,Exon       |
| chr1 | 24143164 | 24144073 | -      | Serum_circ_0026 | 2.86  | 909            | 204            | HMGCL       | CDS,Exon       |
| chr1 | 24840803 | 24841057 | +      | Serum_circ_0027 | 4.29  | 254            | 254            | RCAN3       | CDS,Exon,5'UTR |
| chr1 | 26772806 | 26774151 | +      | Serum_circ_0028 | 3.57  | 1345           | 219            | DHDDS       | CDS,Exon       |
| chr1 | 27056141 | 27059283 | +      | Serum_circ_0029 | 6.43  | 3142           | 783            | ARID1A      | CDS,Exon       |
| chr1 | 29362337 | 29365938 | +      | Serum_circ_0030 | 5.72  | 3601           | 271            | EPB41       | CDS,Exon       |
| chr1 | 29481207 | 29481422 | -      | Serum_circ_0031 | 2.14  | 215            | 215            | SRSF4       | CDS,Exon       |
| chr1 | 31478699 | 31501711 | -      | Serum_circ_0032 | 5.00  | 23012          | 357            | PUM1        | CDS,Exon       |
| chr1 | 31810021 | 31811895 | +      | Serum_circ_0033 | 2.14  | 1874           | 193            | ZCCHC17     | CDS,Exon       |
| chr1 | 31810021 | 31821821 | +      | Serum_circ_0034 | 3.57  | 11800          | 619            | ZCCHC17     | CDS,Exon       |
| chr1 | 33413822 | 33415375 | -      | Serum_circ_0035 | 5.72  | 1553           | 493            | RNF19B      | CDS,Exon       |
| chr1 | 33760537 | 33760906 | +      | Serum_circ_0036 | 7.86  | 369            | 238            | ZNF362      | CDS,Exon       |
| chr1 | 35484953 | 35486068 | -      | Serum_circ_0037 | 5.00  | 1115           | 335            | ZMYM6       | CDS,Exon       |
| chr1 | 35824525 | 35827390 | +      | Serum_circ_0038 | 8.58  | 2865           | 755            | ZMYM4       | CDS,Exon       |
| chr1 | 35854510 | 35859340 | +      | Serum_circ_0039 | 1.43  | 4830           | 648            | ZMYM4       | CDS,Exon       |
| chr1 | 35879572 | 35881315 | +      | Serum_circ_0040 | 2.14  | 1743           | 361            | ZMYM4       | CDS,Exon       |
| chr1 | 38355228 | 38357126 | -      | Serum_circ_0041 | 2.14  | 1898           | 265            | INPP5B      | CDS,Exon       |
| chr1 | 39888045 | 39888572 | +      | Serum_circ_0042 | 1.43  | 527            | 333            | MACF1       | CDS,Exon       |
| chr1 | 40319641 | 40323089 | -      | Serum_circ_0043 | 9.29  | 3448           | 240            | TRIT1       | CDS,Exon       |



|      |           |           |   |                 |       |       |      |                 |                |
|------|-----------|-----------|---|-----------------|-------|-------|------|-----------------|----------------|
| chr1 | 40654726  | 40668286  | + | Serum_circ_0044 | 2.14  | 13560 | 573  | RLF             | CDS,Exon       |
| chr1 | 40656443  | 40668286  | + | Serum_circ_0045 | 2.14  | 11843 | 418  | RLF             | CDS,Exon       |
| chr1 | 42041214  | 42050989  | - | Serum_circ_0046 | 7.15  | 9775  | 5728 | HIVEP3          | CDS,Exon,5'UTR |
| chr1 | 44773981  | 44785416  | - | Serum_circ_0047 | 8.58  | 11435 | 269  | ERI3            | CDS,Exon       |
| chr1 | 46105881  | 46108171  | - | Serum_circ_0048 | 6.43  | 2290  | 267  | GPBP1L1         | CDS,Exon       |
| chr1 | 52293467  | 52299842  | - | Serum_circ_0049 | 2.14  | 6375  | 228  | NRD1            | CDS,Exon       |
| chr1 | 56297936  | 56313210  | + | Serum_circ_0050 | 5.00  | 15274 | NA   | ENST00000424357 | LncRNA         |
| chr1 | 56430582  | 56430707  | - | Serum_circ_0051 | 12.87 | 125   | NA   | TCONS_00000952  | LncRNA         |
| chr1 | 62166605  | 62189444  | - | Serum_circ_0052 | 1.43  | 22839 | 201  | TM2D1           | CDS,Exon       |
| chr1 | 65830317  | 65831879  | + | Serum_circ_0053 | 2.86  | 1562  | 350  | DNAJC6          | CDS,Exon,5'UTR |
| chr1 | 67356836  | 67371058  | - | Serum_circ_0054 | 6.43  | 14222 | 473  | WDR78           | CDS,Exon       |
| chr1 | 67423741  | 67428843  | + | Serum_circ_0055 | 5.00  | 5102  | 433  | MIER1           | CDS,Exon,5'UTR |
| chr1 | 78105133  | 78107340  | - | Serum_circ_0056 | 5.00  | 2207  | 351  | ZZZ3            | Exon,5'UTR     |
| chr1 | 78177431  | 78178966  | - | Serum_circ_0057 | 18.58 | 1535  | 191  | USP33           | CDS,Exon       |
| chr1 | 78324622  | 78329713  | + | Serum_circ_0058 | 1.43  | 5091  | 513  | FAM73A          | CDS,Exon       |
| chr1 | 89401781  | 89435150  | - | Serum_circ_0059 | 3.57  | 33369 | 1203 | CCBL2           | CDS,Exon,5'UTR |
| chr1 | 92728419  | 92737209  | - | Serum_circ_0060 | 3.57  | 8790  | 738  | GLMN            | CDS,Exon       |
| chr1 | 93070863  | 93170301  | - | Serum_circ_0061 | 2.14  | 99438 | 1741 | EV15            | CDS,Exon       |
| chr1 | 93770944  | 93791452  | - | Serum_circ_0062 | 2.14  | 20508 | NA   | ENST00000446528 | LncRNA         |
| chr1 | 95609446  | 95616975  | + | Serum_circ_0063 | 7.86  | 7529  | 410  | TMEM56          | CDS,Exon,5'UTR |
| chr1 | 95609446  | 95639445  | + | Serum_circ_0064 | 1.43  | 29999 | 484  | TMEM56          | CDS,Exon,5'UTR |
| chr1 | 97876622  | 97878800  | - | Serum_circ_0065 | 3.57  | 2178  | NA   | DPYD            | Intron         |
| chr1 | 100856287 | 100908552 | + | Serum_circ_0066 | 1.43  | 52265 | 303  | CDC14A          | CDS,Exon       |
| chr1 | 101427383 | 101440458 | + | Serum_circ_0067 | 2.86  | 13075 | 334  | SLC30A7         | CDS,Exon,3'UTR |
| chr1 | 114389178 | 114397671 | - | Serum_circ_0068 | 1.43  | 8493  | 375  | PTPN22          | CDS,Exon       |
| chr1 | 117944807 | 117948267 | + | Serum_circ_0069 | 2.86  | 3460  | 353  | MAN1A2          | CDS,Exon       |
| chr1 | 117944807 | 117963271 | + | Serum_circ_0070 | 3.57  | 18464 | 553  | MAN1A2          | CDS,Exon       |
| chr1 | 145439592 | 145440140 | + | Serum_circ_0071 | 4.29  | 548   | 324  | TXNIP           | CDS,Exon       |
| chr1 | 150990287 | 150991145 | + | Serum_circ_0072 | 6.43  | 858   | 296  | PRUNE           | CDS,Exon       |
| chr1 | 155110036 | 155110847 | + | Serum_circ_0073 | 2.14  | 811   | 426  | SLC50A1         | CDS,Exon       |
| chr1 | 155340294 | 155340774 | - | Serum_circ_0074 | 1.43  | 480   | 354  | ASH1L           | CDS,Exon       |
| chr1 | 155348071 | 155385714 | - | Serum_circ_0075 | 5.00  | 37643 | 504  | ASH1L           | CDS,Exon       |
| chr1 | 155408117 | 155429689 | - | Serum_circ_0076 | 2.14  | 21572 | 844  | ASH1L           | CDS,Exon       |
| chr1 | 155646338 | 155649303 | - | Serum_circ_0077 | 6.43  | 2965  | 459  | YY1AP1          | CDS,Exon,5'UTR |
| chr1 | 155691307 | 155695810 | + | Serum_circ_0078 | 1.43  | 4503  | 304  | DAP3            | CDS,Exon       |
| chr1 | 156303337 | 156304709 | - | Serum_circ_0079 | 1.43  | 1372  | 211  | CCT3            | CDS,Exon,3'UTR |
| chr1 | 160805984 | 160808839 | - | Serum_circ_0080 | 1.43  | 2855  | 239  | CD244           | CDS,Exon       |
| chr1 | 161071837 | 161072165 | - | Serum_circ_0081 | 2.86  | 328   | 213  | PFDN2           | CDS,Exon       |
| chr1 | 169767997 | 169770112 | + | Serum_circ_0082 | 2.86  | 2115  | 191  | C1orf112        | CDS,Exon,5'UTR |
| chr1 | 169947225 | 170001116 | - | Serum_circ_0083 | 1.43  | 53891 | 1056 | KIFAP3          | CDS,Exon       |
| chr1 | 171492359 | 171502100 | + | Serum_circ_0084 | 1.43  | 9741  | 1040 | PRRC2C          | CDS,Exon       |
| chr1 | 171537385 | 171540560 | + | Serum_circ_0085 | 4.29  | 3175  | 195  | PRRC2C          | CDS,Exon       |
| chr1 | 172011148 | 172100428 | + | Serum_circ_0086 | 4.29  | 89280 | 667  | DNM3            | CDS,Exon       |
| chr1 | 172037958 | 172100428 | + | Serum_circ_0087 | 5.72  | 62470 | 324  | DNM3            | CDS,Exon       |
| chr1 | 172061963 | 172100428 | + | Serum_circ_0088 | 10.01 | 38465 | 166  | DNM3            | CDS,Exon       |
| chr1 | 172520651 | 172526934 | + | Serum_circ_0089 | 2.86  | 6283  | 670  | SUCO            | CDS,Exon,5'UTR |
| chr1 | 174241551 | 174274265 | + | Serum_circ_0090 | 2.14  | 32714 | 479  | RABGAP1L        | CDS,Exon       |
| chr1 | 176085759 | 176105683 | - | Serum_circ_0091 | 2.86  | 19924 | 195  | RFWD2           | CDS,Exon       |
| chr1 | 182523628 | 182523761 | - | Serum_circ_0092 | 1.43  | 133   | NA   | RGSL1           | Antisense      |
| chr1 | 182778977 | 182781348 | + | Serum_circ_0093 | 2.14  | 2371  | 58   | NPL             | CDS,Exon       |

|       |           |           |   |                 |       |       |      |              |                 |
|-------|-----------|-----------|---|-----------------|-------|-------|------|--------------|-----------------|
| chr1  | 183513487 | 183513632 | + | Serum_circ_0094 | 3.57  | 145   | 145  | SMG7         | CDS,Exon        |
| chr1  | 184675776 | 184681011 | - | Serum_circ_0095 | 3.57  | 5235  | 667  | EDEM3        | CDS,Exon        |
| chr1  | 185135703 | 185144245 | + | Serum_circ_0096 | 2.14  | 8542  | 882  | SWT1         | CDS,Exon        |
| chr1  | 186420310 | 186439527 | + | Serum_circ_0097 | 1.43  | 19217 | NA   | LOC102724919 | LncRNA          |
| chr1  | 197515051 | 197581106 | - | Serum_circ_0098 | 2.14  | 66055 | 1435 | DENND1B      | CDS,Exon,3'UTR  |
| chr1  | 197552281 | 197581153 | - | Serum_circ_0099 | 2.86  | 28872 | 376  | DENND1B      | CDS,Exon        |
| chr1  | 198201682 | 198222310 | + | Serum_circ_0100 | 2.14  | 20628 | 226  | NEK7         | CDS,Exon,5'UTR  |
| chr1  | 198201682 | 198233365 | + | Serum_circ_0101 | 2.14  | 31683 | 400  | NEK7         | CDS,Exon,5'UTR  |
| chr1  | 205585605 | 205593019 | - | Serum_circ_0102 | 6.43  | 7414  | 2777 | ELK4         | CDS,Exon,3'UTR  |
| chr1  | 206589248 | 206603572 | + | Serum_circ_0103 | 1.43  | 14324 | 199  | SRGAP2       | CDS,Exon        |
| chr1  | 207200838 | 207201024 | - | Serum_circ_0104 | 2.86  | 186   | 186  | C1orf116     | CDS,Exon,5'UTR  |
| chr1  | 212190227 | 212194554 | - | Serum_circ_0105 | 3.57  | 4327  | 449  | INTS7        | CDS,Exon,3'UTR  |
| chr1  | 212502476 | 212506940 | + | Serum_circ_0106 | 2.14  | 4464  | 299  | PPP2R5A      | CDS,Exon        |
| chr1  | 213403839 | 213405598 | + | Serum_circ_0107 | 1.43  | 1759  | 181  | RPS6KC1      | CDS,Exon        |
| chr1  | 219352488 | 219385094 | + | Serum_circ_0108 | 2.86  | 32606 | 386  | LYPLAL1      | CDS,Exon        |
| chr1  | 220355598 | 220356273 | - | Serum_circ_0109 | 3.57  | 675   | 312  | RAB3GAP2     | CDS,Exon        |
| chr1  | 224592131 | 224601037 | - | Serum_circ_0110 | 4.29  | 8906  | 280  | WDR26        | CDS,Exon        |
| chr1  | 224605961 | 224612356 | - | Serum_circ_0111 | 2.86  | 6395  | 392  | WDR26        | CDS,Exon        |
| chr1  | 227085420 | 227086147 | + | Serum_circ_0112 | 2.14  | 727   | NA   | NA           | Intergenic      |
| chr1  | 227192694 | 227204751 | - | Serum_circ_0113 | 2.86  | 12057 | 360  | CDC42BPA     | CDS,Exon        |
| chr1  | 227381486 | 227441856 | - | Serum_circ_0114 | 2.14  | 60370 | 421  | CDC42BPA     | CDS,Exon        |
| chr1  | 231093969 | 231097049 | - | Serum_circ_0115 | 4.29  | 3080  | 171  | TTC13        | CDS,Exon        |
| chr1  | 235600636 | 235606226 | + | Serum_circ_0116 | 3.57  | 5590  | 436  | TBCE         | CDS,Exon        |
| chr1  | 235602083 | 235606226 | + | Serum_circ_0117 | 1.43  | 4143  | 283  | TBCE         | CDS,Exon        |
| chr1  | 235883960 | 235896991 | - | Serum_circ_0118 | 1.43  | 13031 | 948  | LYST         | CDS,Exon        |
| chr1  | 235950499 | 235955425 | - | Serum_circ_0119 | 3.57  | 4926  | 746  | LYST         | CDS,Exon        |
| chr1  | 236187369 | 236201553 | - | Serum_circ_0120 | 1.43  | 14184 | 993  | NID1         | CDS,Exon        |
| chr1  | 243579003 | 243589860 | + | Serum_circ_0121 | 4.29  | 10857 | 369  | SDCCAG8      | CDS,Exon        |
| chr1  | 243776972 | 243778463 | - | Serum_circ_0122 | 1.43  | 1491  | 135  | AKT3         | CDS,Exon        |
| chr1  | 246754813 | 246755243 | + | Serum_circ_0123 | 9.29  | 430   | 430  | CNST         | CDS,Exon,5'UTR  |
| chr1  | 246781559 | 246797889 | + | Serum_circ_0124 | 1.43  | 16330 | 439  | CNST         | CDS,Exon        |
| chr1  | 246794660 | 246795226 | + | Serum_circ_0125 | 5.00  | 566   | 31   | CNST         | CDS,Exon        |
| chr1  | 246890193 | 246903603 | + | Serum_circ_0126 | 2.14  | 13410 | 324  | SCCPDH       | CDS,Exon        |
| chr1  | 247248379 | 247248480 | - | Serum_circ_0127 | 5.72  | 101   | NA   | NA           | Intergenic      |
| chr10 | 428438    | 428611    | - | Serum_circ_0128 | 6.43  | 173   | NA   | DIP2C        | Exon,CDS,Intron |
| chr10 | 1125950   | 1126416   | + | Serum_circ_0129 | 6.43  | 466   | 161  | WDR37        | CDS,Exon        |
| chr10 | 6520953   | 6540520   | - | Serum_circ_0130 | 2.86  | 19567 | 974  | PRKCQ        | CDS,Exon        |
| chr10 | 11308560  | 11330515  | + | Serum_circ_0131 | 4.29  | 21955 | 438  | CELF2        | CDS,Exon        |
| chr10 | 12148244  | 12150014  | + | Serum_circ_0132 | 2.14  | 1770  | 258  | DHTKD1       | CDS,Exon        |
| chr10 | 15875628  | 15879317  | - | Serum_circ_0133 | 3.57  | 3689  | 269  | FAM188A      | CDS,Exon        |
| chr10 | 16794537  | 16824083  | - | Serum_circ_0134 | 5.00  | 29546 | 489  | RSU1         | CDS,Exon,5'UTR  |
| chr10 | 17632344  | 17646046  | - | Serum_circ_0135 | 2.14  | 13702 | 527  | PTPLA        | CDS,Exon        |
| chr10 | 17645558  | 17646046  | - | Serum_circ_0136 | 10.01 | 488   | 226  | PTPLA        | CDS,Exon        |
| chr10 | 18898773  | 18931484  | - | Serum_circ_0137 | 2.86  | 32711 | 426  | NSUN6        | CDS,Exon        |
| chr10 | 20432223  | 20466338  | + | Serum_circ_0138 | 2.14  | 34115 | 520  | PLXDC2       | CDS,Exon        |
| chr10 | 20465927  | 20466338  | + | Serum_circ_0139 | 2.86  | 411   | 178  | PLXDC2       | CDS,Exon        |
| chr10 | 21979836  | 22016857  | + | Serum_circ_0140 | 5.72  | 37021 | 364  | MLLT10       | CDS,Exon        |
| chr10 | 22002700  | 22016857  | + | Serum_circ_0141 | 2.86  | 14157 | 364  | MLLT10       | CDS,Exon        |
| chr10 | 22896855  | 22898646  | - | Serum_circ_0142 | 7.15  | 1791  | 195  | PIP4K2A      | CDS,Exon        |
| chr10 | 24896527  | 24896669  | + | Serum_circ_0143 | 2.14  | 142   | NA   | ARHGAP21     | Antisense       |

|       |           |           |   |                 |       |       |      |          |                |
|-------|-----------|-----------|---|-----------------|-------|-------|------|----------|----------------|
| chr10 | 24918924  | 24924032  | - | Serum_circ_0144 | 9.29  | 5108  | 227  | ARHGAP21 | CDS,Exon       |
| chr10 | 27815756  | 27826957  | + | Serum_circ_0145 | 1.43  | 11201 | 408  | RAB18    | CDS,Exon,5'UTR |
| chr10 | 28897114  | 28900851  | + | Serum_circ_0146 | 1.43  | 3737  | 518  | WAC      | CDS,Exon,5'UTR |
| chr10 | 30739186  | 30739448  | + | Serum_circ_0147 | 2.86  | 262   | 262  | MAP3K8   | CDS,Exon       |
| chr10 | 32740519  | 32762951  | + | Serum_circ_0148 | 1.43  | 22432 | 847  | CCDC7    | CDS,Exon,5'UTR |
| chr10 | 34739244  | 34806087  | - | Serum_circ_0149 | 4.29  | 66843 | 492  | PARD3    | CDS,Exon       |
| chr10 | 35321362  | 35333796  | - | Serum_circ_0150 | 3.57  | 12434 | 664  | CUL2     | CDS,Exon       |
| chr10 | 35805450  | 35819171  | + | Serum_circ_0151 | 4.29  | 13721 | 315  | CCNY     | CDS,Exon       |
| chr10 | 52193235  | 52279681  | - | Serum_circ_0152 | 4.29  | 86446 | 357  | SGMS1    | Exon,5'UTR     |
| chr10 | 52268393  | 52350007  | - | Serum_circ_0153 | 1.43  | 81614 | 186  | SGMS1    | Exon,5'UTR     |
| chr10 | 52279590  | 52350007  | - | Serum_circ_0154 | 2.14  | 70417 | 186  | SGMS1    | Exon,5'UTR     |
| chr10 | 64976966  | 64979743  | - | Serum_circ_0155 | 1.43  | 2777  | 231  | JMJD1C   | CDS,Exon,5'UTR |
| chr10 | 69648639  | 69651312  | + | Serum_circ_0156 | 5.00  | 2673  | 395  | SIRT1    | CDS,Exon,5'UTR |
| chr10 | 69692353  | 69700862  | - | Serum_circ_0157 | 4.29  | 8509  | 501  | HERC4    | CDS,Exon       |
| chr10 | 69714351  | 69726559  | - | Serum_circ_0158 | 5.00  | 12208 | 555  | HERC4    | CDS,Exon       |
| chr10 | 70218860  | 70229920  | - | Serum_circ_0159 | 2.14  | 11060 | 645  | DNA2     | CDS,Exon,3'UTR |
| chr10 | 70227879  | 70229920  | - | Serum_circ_0160 | 3.57  | 2041  | 367  | DNA2     | CDS,Exon,3'UTR |
| chr10 | 70246900  | 70266475  | - | Serum_circ_0161 | 3.57  | 19575 | 619  | SLC25A16 | CDS,Exon       |
| chr10 | 70497601  | 70502326  | + | Serum_circ_0162 | 5.00  | 4725  | 272  | CCAR1    | CDS,Exon,5'UTR |
| chr10 | 70513608  | 70531202  | + | Serum_circ_0163 | 4.29  | 17594 | 1487 | CCAR1    | CDS,Exon,5'UTR |
| chr10 | 70520763  | 70532856  | + | Serum_circ_0164 | 1.43  | 12093 | 730  | CCAR1    | CDS,Exon,5'UTR |
| chr10 | 70545892  | 70546449  | + | Serum_circ_0165 | 2.14  | 557   | 230  | CCAR1    | CDS,Exon,5'UTR |
| chr10 | 70547683  | 70548085  | + | Serum_circ_0166 | 1.43  | 402   | 307  | CCAR1    | CDS,Exon,5'UTR |
| chr10 | 71142242  | 71146174  | + | Serum_circ_0167 | 2.14  | 3932  | 670  | HK1      | CDS,Exon       |
| chr10 | 74100546  | 74100928  | - | Serum_circ_0168 | 1.43  | 382   | 266  | DNAJB12  | CDS,Exon       |
| chr10 | 74468040  | 74475660  | + | Serum_circ_0169 | 5.72  | 7620  | 165  | MCU      | Exon,5'UTR     |
| chr10 | 74474868  | 74475660  | + | Serum_circ_0170 | 7.86  | 792   | 165  | MCU      | Exon,5'UTR     |
| chr10 | 75830427  | 75832610  | + | Serum_circ_0171 | 2.14  | 2183  | 383  | VCL      | CDS,Exon       |
| chr10 | 75830427  | 75834661  | + | Serum_circ_0172 | 2.14  | 4234  | 544  | VCL      | CDS,Exon       |
| chr10 | 76598440  | 76603236  | + | Serum_circ_0173 | 2.86  | 4796  | 949  | KAT6B    | CDS,Exon,5'UTR |
| chr10 | 86177526  | 86185649  | + | Serum_circ_0174 | 2.86  | 8123  | 409  | CCSER2   | CDS,Exon,5'UTR |
| chr10 | 89267885  | 89272978  | + | Serum_circ_0175 | 1.43  | 5093  | 296  | MINPP1   | CDS,Exon       |
| chr10 | 94653105  | 94659401  | + | Serum_circ_0176 | 10.72 | 6296  | 357  | EXOC6    | CDS,Exon       |
| chr10 | 98667021  | 98667504  | + | Serum_circ_0177 | 1.43  | 483   | 146  | LCOR     | Exon,5'UTR     |
| chr10 | 99196173  | 99197507  | - | Serum_circ_0178 | 2.14  | 1334  | 136  | EXOSC1   | CDS,Exon       |
| chr10 | 99196947  | 99198460  | - | Serum_circ_0179 | 4.29  | 1513  | 170  | EXOSC1   | CDS,Exon       |
| chr10 | 103427642 | 103436193 | - | Serum_circ_0180 | 6.43  | 8551  | 510  | FBXW4    | CDS,Exon       |
| chr10 | 103716353 | 103761829 | - | Serum_circ_0181 | 4.29  | 45476 | 657  | C10orf76 | CDS,Exon       |
| chr10 | 105767934 | 105778666 | + | Serum_circ_0182 | 10.01 | 10732 | 528  | SLK      | CDS,Exon       |
| chr10 | 112188693 | 112202132 | - | Serum_circ_0183 | 5.00  | 13439 | NA   | NA       | Intergenic     |
| chr10 | 112349362 | 112350890 | + | Serum_circ_0184 | 1.43  | 1528  | 507  | SMC3     | CDS,Exon       |
| chr10 | 112356155 | 112358048 | + | Serum_circ_0185 | 8.58  | 1893  | 305  | SMC3     | CDS,Exon       |
| chr10 | 112635723 | 112642855 | + | Serum_circ_0186 | 5.00  | 7132  | 848  | PDCD4    | CDS,Exon,5'UTR |
| chr10 | 112723882 | 112745523 | + | Serum_circ_0187 | 3.57  | 21641 | 1075 | SHOC2    | CDS,Exon,5'UTR |
| chr10 | 116879948 | 116925405 | + | Serum_circ_0188 | 5.72  | 45457 | 901  | ATRNL1   | CDS,Exon,5'UTR |
| chr10 | 121657755 | 121658471 | + | Serum_circ_0189 | 4.29  | 716   | 533  | SEC23IP  | CDS,Exon       |
| chr10 | 121685547 | 121693299 | + | Serum_circ_0190 | 2.86  | 7752  | 902  | SEC23IP  | CDS,Exon,3'UTR |
| chr10 | 123596232 | 123629553 | - | Serum_circ_0191 | 4.29  | 33321 | 315  | ATE1     | CDS,Exon,3'UTR |
| chr10 | 123659380 | 123662135 | - | Serum_circ_0192 | 2.86  | 2755  | 359  | ATE1     | CDS,Exon,3'UTR |
| chr10 | 126097110 | 126097534 | - | Serum_circ_0193 | 1.43  | 424   | 321  | OAT      | CDS,Exon,5'UTR |

|       |           |           |   |                 |       |       |      |          |                |
|-------|-----------|-----------|---|-----------------|-------|-------|------|----------|----------------|
| chr10 | 133757598 | 133769715 | + | Serum_circ_0194 | 1.43  | 12117 | 478  | PPP2R2D  | CDS,Exon,5'UTR |
| chr10 | 134503895 | 134523960 | + | Serum_circ_0195 | 2.86  | 20065 | 341  | INPP5A   | CDS,Exon       |
| chr10 | 135209216 | 135216277 | + | Serum_circ_0196 | 3.57  | 7061  | 640  | MTG1     | CDS,Exon       |
| chr11 | 9304917   | 9321248   | - | Serum_circ_0197 | 6.43  | 16331 | 1104 | TMEM41B  | CDS,Exon,3'UTR |
| chr11 | 17115807  | 17118811  | - | Serum_circ_0198 | 1.43  | 3004  | 333  | PIK3C2A  | CDS,Exon       |
| chr11 | 18312988  | 18313566  | - | Serum_circ_0199 | 2.14  | 578   | 578  | HPS5     | CDS,Exon       |
| chr11 | 26057123  | 26057303  | - | Serum_circ_0200 | 2.86  | 180   | NA   | NA       | Intergenic     |
| chr11 | 28250417  | 28252532  | + | Serum_circ_0201 | 2.14  | 2115  | NA   | METTL15  | Intron         |
| chr11 | 33127112  | 33127610  | - | Serum_circ_0202 | 2.14  | 498   | 229  | CSTF3    | CDS,Exon       |
| chr11 | 33307958  | 33309057  | + | Serum_circ_0203 | 9.29  | 1099  | 1099 | HIPK3    | CDS,Exon,5'UTR |
| chr11 | 34952950  | 35006275  | + | Serum_circ_0204 | 4.29  | 53325 | 1106 | PDHX     | CDS,Exon,5'UTR |
| chr11 | 46829580  | 46831424  | - | Serum_circ_0205 | 3.57  | 1844  | 348  | CKAP5    | CDS,Exon       |
| chr11 | 48175347  | 48177671  | + | Serum_circ_0206 | 5.00  | 2324  | 300  | PTPRJ    | CDS,Exon       |
| chr11 | 63426509  | 63426724  | - | Serum_circ_0207 | 2.86  | 215   | 215  | ATL3     | CDS,Exon,5'UTR |
| chr11 | 63963116  | 63963285  | + | Serum_circ_0208 | 1.43  | 169   | 169  | STIP1    | CDS,Exon       |
| chr11 | 68529002  | 68529155  | - | Serum_circ_0209 | 2.86  | 153   | 153  | CPT1A    | CDS,Exon       |
| chr11 | 70271437  | 70277386  | + | Serum_circ_0210 | 1.43  | 5949  | 309  | CTTN     | CDS,Exon       |
| chr11 | 72560799  | 72579071  | - | Serum_circ_0211 | 2.14  | 18272 | 297  | FCHSD2   | CDS,Exon       |
| chr11 | 73418464  | 73429935  | - | Serum_circ_0212 | 3.57  | 11471 | 418  | RAB6A    | CDS,Exon       |
| chr11 | 74528640  | 74529090  | + | Serum_circ_0213 | 1.43  | 450   | 119  | RNF169   | CDS,Exon       |
| chr11 | 77394754  | 77404656  | - | Serum_circ_0214 | 5.00  | 9902  | 350  | RSF1     | CDS,Exon       |
| chr11 | 77396149  | 77404656  | - | Serum_circ_0215 | 1.43  | 8507  | 240  | RSF1     | CDS,Exon       |
| chr11 | 77402203  | 77404656  | - | Serum_circ_0216 | 1.43  | 2453  | 185  | RSF1     | CDS,Exon       |
| chr11 | 77820487  | 77823816  | - | Serum_circ_0217 | 4.29  | 3329  | 261  | RNU6-83P | CDS,Exon       |
| chr11 | 85707868  | 85712201  | - | Serum_circ_0218 | 1.43  | 4333  | 365  | PICALM   | CDS,Exon       |
| chr11 | 85707868  | 85714494  | - | Serum_circ_0219 | 4.29  | 6626  | 451  | PICALM   | CDS,Exon       |
| chr11 | 85718584  | 85742653  | - | Serum_circ_0220 | 2.14  | 24069 | 677  | PICALM   | CDS,Exon,5'UTR |
| chr11 | 85723323  | 85742653  | - | Serum_circ_0221 | 2.14  | 19330 | 528  | PICALM   | CDS,Exon,5'UTR |
| chr11 | 85733409  | 85742653  | - | Serum_circ_0222 | 5.72  | 9244  | 322  | PICALM   | CDS,Exon,5'UTR |
| chr11 | 85961337  | 85967554  | + | Serum_circ_0223 | 4.29  | 6217  | 438  | EED      | CDS,Exon       |
| chr11 | 86778735  | 86802437  | + | Serum_circ_0224 | 1.43  | 23702 | 255  | TMEM135  | CDS,Exon,5'UTR |
| chr11 | 95546095  | 95546753  | + | Serum_circ_0225 | 3.57  | 658   | 302  | CEP57    | CDS,Exon       |
| chr11 | 101416591 | 101448221 | - | Serum_circ_0226 | 3.57  | 31630 | NA   | TRPC6    | Intron         |
| chr11 | 108046972 | 108047817 | - | Serum_circ_0227 | 8.58  | 845   | 226  | NPAT     | CDS,Exon       |
| chr11 | 108172374 | 108175579 | + | Serum_circ_0228 | 4.29  | 3205  | 497  | ATM      | CDS,Exon       |
| chr11 | 111625222 | 111626174 | - | Serum_circ_0229 | 7.86  | 952   | 342  | PPP2R1B  | CDS,Exon       |
| chr11 | 114038184 | 114038354 | + | Serum_circ_0230 | 6.43  | 170   | NA   | ZBTB16   | Intron         |
| chr11 | 115670224 | 115670348 | + | Serum_circ_0231 | 4.29  | 124   | NA   | NA       | Intergenic     |
| chr11 | 117150623 | 117150975 | + | Serum_circ_0232 | 2.86  | 352   | 186  | RNF214   | CDS,Exon       |
| chr11 | 119155678 | 119156276 | + | Serum_circ_0233 | 1.43  | 598   | 510  | CBL      | CDS,Exon       |
| chr11 | 124517260 | 124518071 | - | Serum_circ_0234 | 17.87 | 811   | 244  | SIAE     | CDS,Exon       |
| chr11 | 128638012 | 128642880 | + | Serum_circ_0235 | 1.43  | 4868  | 359  | FLI1     | CDS,Exon       |
| chr11 | 128638012 | 128651918 | + | Serum_circ_0236 | 2.86  | 13906 | 425  | FLI1     | CDS,Exon       |
| chr11 | 128993340 | 129034322 | - | Serum_circ_0237 | 2.14  | 40982 | 286  | ARHGAP32 | CDS,Exon       |
| chr11 | 129979323 | 129980556 | + | Serum_circ_0238 | 2.14  | 1233  | 375  | APLP2    | CDS,Exon,5'UTR |
| chr11 | 130130750 | 130131824 | - | Serum_circ_0239 | 2.86  | 1074  | 1074 | ZBTB44   | CDS,Exon,5'UTR |
| chr12 | 938227    | 939110    | + | Serum_circ_0240 | 1.43  | 883   | NA   | WNK1     | Intron         |
| chr12 | 1289705   | 1299218   | + | Serum_circ_0241 | 3.57  | 9513  | 614  | ERC1     | CDS,Exon,5'UTR |
| chr12 | 5908672   | 5939655   | - | Serum_circ_0242 | 3.57  | 30983 | 270  | ANO2     | CDS,Exon       |
| chr12 | 19615443  | 19626289  | + | Serum_circ_0243 | 5.72  | 10846 | 316  | AEBP2    | CDS,Exon       |

|       |           |           |   |                 |       |       |     |          |                                  |
|-------|-----------|-----------|---|-----------------|-------|-------|-----|----------|----------------------------------|
| chr12 | 20774229  | 20783061  | + | Serum_circ_0244 | 6.43  | 8832  | 336 | PDE3A    | CDS,Exon                         |
| chr12 | 25232177  | 25243131  | + | Serum_circ_0245 | 8.58  | 10954 | 582 | LRMP     | CDS,Exon                         |
| chr12 | 27107077  | 27110676  | + | Serum_circ_0246 | 6.43  | 3599  | 410 | FGFR10P2 | CDS,Exon,5'UTR                   |
| chr12 | 27156168  | 27156323  | - | Serum_circ_0247 | 1.43  | 155   | 155 | TM7SF3   | CDS,Exon                         |
| chr12 | 27521194  | 27529320  | + | Serum_circ_0248 | 1.43  | 8126  | 295 | ARNTL2   | CDS,Exon<br>Exon,CDS,5'UTR       |
| chr12 | 28378727  | 28412375  | + | Serum_circ_0249 | 9.29  | 33648 | NA  | NA       | ,Intergenic                      |
| chr12 | 28457558  | 28460682  | + | Serum_circ_0250 | 2.14  | 3124  | 467 | CCDC91   | CDS,Exon                         |
| chr12 | 28458581  | 28460682  | + | Serum_circ_0251 | 2.14  | 2101  | 467 | CCDC91   | CDS,Exon                         |
| chr12 | 28458581  | 28544344  | + | Serum_circ_0252 | 1.43  | 85763 | 653 | CCDC91   | CDS,Exon                         |
| chr12 | 29446232  | 29450133  | + | Serum_circ_0253 | 2.86  | 3901  | 356 | FAR2     | CDS,Exon,5'UTR<br>Exon,CDS,3'UTR |
| chr12 | 29492783  | 29494749  | - | Serum_circ_0254 | 4.29  | 1966  | NA  | NA       | ,Intergenic                      |
| chr12 | 30873744  | 30877385  | - | Serum_circ_0255 | 2.86  | 3641  | 243 | CAPRIN2  | CDS,Exon,3'UTR                   |
| chr12 | 31841940  | 31862359  | - | Serum_circ_0256 | 4.29  | 20419 | 665 | AMN1     | CDS,Exon                         |
| chr12 | 32751430  | 32764217  | + | Serum_circ_0257 | 7.86  | 12787 | 738 | FGD4     | CDS,Exon                         |
| chr12 | 32760890  | 32764217  | + | Serum_circ_0258 | 1.43  | 3327  | 345 | FGD4     | CDS,Exon                         |
| chr12 | 32871576  | 32875567  | + | Serum_circ_0259 | 1.43  | 3991  | 460 | DNM1L    | CDS,Exon                         |
| chr12 | 42604156  | 42604421  | - | Serum_circ_0260 | 1.43  | 265   | 72  | YAF2     | CDS,Exon                         |
| chr12 | 42768664  | 42768876  | + | Serum_circ_0261 | 5.72  | 212   | 212 | PPHLN1   | CDS,Exon                         |
| chr12 | 45695796  | 45744557  | + | Serum_circ_0262 | 2.14  | 48761 | 793 | ANO6     | CDS,Exon                         |
| chr12 | 46339031  | 46345510  | - | Serum_circ_0263 | 4.29  | 6479  | 244 | SCAF11   | CDS,Exon                         |
| chr12 | 46622935  | 46648719  | - | Serum_circ_0264 | 2.14  | 25784 | 645 | SLC38A1  | CDS,Exon,5'UTR                   |
| chr12 | 46633461  | 46637097  | - | Serum_circ_0265 | 1.43  | 3636  | 330 | SLC38A1  | CDS,Exon,5'UTR                   |
| chr12 | 46633461  | 46648719  | - | Serum_circ_0266 | 2.14  | 15258 | 453 | SLC38A1  | CDS,Exon,5'UTR                   |
| chr12 | 49167251  | 49168301  | - | Serum_circ_0267 | 3.57  | 1050  | 455 | ADCY6    | CDS,Exon                         |
| chr12 | 50410413  | 50412372  | - | Serum_circ_0268 | 3.57  | 1959  | 163 | RACGAP1  | CDS,Exon,5'UTR                   |
| chr12 | 54686962  | 54687104  | + | Serum_circ_0269 | 1.43  | 142   | NA  | NFE2     | Antisense                        |
| chr12 | 57677606  | 57677839  | - | Serum_circ_0270 | 3.57  | 233   | 233 | R3HDM2   | CDS,Exon                         |
| chr12 | 66620502  | 66622150  | + | Serum_circ_0271 | 1.43  | 1648  | 234 | IRAK3    | CDS,Exon                         |
| chr12 | 69983264  | 69985939  | + | Serum_circ_0272 | 9.29  | 2675  | 304 | CCT2     | CDS,Exon                         |
| chr12 | 69983264  | 69987393  | + | Serum_circ_0273 | 5.00  | 4129  | 536 | CCT2     | CDS,Exon                         |
| chr12 | 70193988  | 70195501  | + | Serum_circ_0274 | 4.29  | 1513  | 242 | RAB3IP   | CDS,Exon                         |
| chr12 | 72956632  | 72969322  | + | Serum_circ_0275 | 1.43  | 12690 | 467 | TRHDE    | CDS,Exon                         |
| chr12 | 96692646  | 96694138  | - | Serum_circ_0276 | 5.72  | 1492  | 172 | CDK17    | CDS,Exon                         |
| chr12 | 96692646  | 96704955  | - | Serum_circ_0277 | 3.57  | 12309 | 298 | CDK17    | CDS,Exon                         |
| chr12 | 96717725  | 96728643  | - | Serum_circ_0278 | 7.86  | 10918 | 312 | CDK17    | CDS,Exon,5'UTR                   |
| chr12 | 105610846 | 105623001 | - | Serum_circ_0279 | 1.43  | 12155 | 231 | APPL2    | CDS,Exon,5'UTR                   |
| chr12 | 107236366 | 107237725 | + | Serum_circ_0280 | 10.01 | 1359  | 325 | RIC8B    | CDS,Exon                         |
| chr12 | 109046047 | 109048186 | - | Serum_circ_0281 | 71.48 | 2139  | 251 | CORO1C   | CDS,Exon                         |
| chr12 | 109660311 | 109661709 | + | Serum_circ_0282 | 4.29  | 1398  | 318 | ACACB    | CDS,Exon                         |
| chr12 | 110467282 | 110471762 | + | Serum_circ_0283 | 4.29  | 4480  | 433 | ANKRD13A | CDS,Exon                         |
| chr12 | 111923068 | 111924628 | - | Serum_circ_0284 | 2.86  | 1560  | 278 | ATXN2    | CDS,Exon                         |
| chr12 | 116668337 | 116675510 | - | Serum_circ_0285 | 7.86  | 7173  | 238 | MED13L   | CDS,Exon                         |
| chr12 | 118693252 | 118693460 | - | Serum_circ_0286 | 2.86  | 208   | 208 | TAOK3    | CDS,Exon,5'UTR                   |
| chr12 | 120213589 | 120214646 | - | Serum_circ_0287 | 2.86  | 1057  | 276 | CIT      | CDS,Exon                         |
| chr12 | 122218777 | 122219098 | - | Serum_circ_0288 | 2.14  | 321   | 245 | RHOF     | CDS,Exon                         |
| chr12 | 123052807 | 123058927 | + | Serum_circ_0289 | 2.14  | 6120  | 778 | KNTC1    | CDS,Exon                         |
| chr12 | 124071293 | 124074996 | + | Serum_circ_0290 | 5.00  | 3703  | 301 | TMED2    | CDS,Exon                         |
| chr12 | 124856567 | 124857156 | - | Serum_circ_0291 | 6.43  | 589   | 589 | NCOR2    | CDS,Exon                         |
| chr12 | 132061420 | 132061825 | + | Serum_circ_0292 | 2.14  | 405   | NA  | NA       | Intergenic                       |
| chr12 | 133768074 | 133768589 | + | Serum_circ_0293 | 1.43  | 515   | 223 | ZNF268   | CDS,Exon,5'UTR                   |

|       |           |           |   |                 |       |       |      |                |                |
|-------|-----------|-----------|---|-----------------|-------|-------|------|----------------|----------------|
| chr13 | 20632714  | 20633702  | + | Serum_circ_0294 | 2.14  | 988   | 246  | ZMYM2          | CDS,Exon       |
| chr13 | 21305979  | 21306260  | - | Serum_circ_0295 | 5.00  | 281   | 281  | N6AMT2         | CDS,Exon       |
| chr13 | 21735928  | 21746820  | - | Serum_circ_0296 | 5.72  | 10892 | 726  | SKA3           | CDS,Exon       |
| chr13 | 21742126  | 21742538  | - | Serum_circ_0297 | 2.14  | 412   | 412  | SKA3           | CDS,Exon       |
| chr13 | 22858430  | 22858561  | - | Serum_circ_0298 | 1.43  | 131   | NA   | NA             | Intergenic     |
| chr13 | 23939304  | 23945304  | - | Serum_circ_0299 | 2.86  | 6000  | 286  | SACS           | CDS,Exon,5'UTR |
| chr13 | 25881943  | 25893488  | + | Serum_circ_0300 | 2.14  | 11545 | 603  | NUPL1          | CDS,Exon       |
| chr13 | 28748408  | 28752072  | + | Serum_circ_0301 | 4.29  | 3664  | 260  | PAN3           | CDS,Exon       |
| chr13 | 29284896  | 29287687  | - | Serum_circ_0302 | 1.43  | 2791  | 955  | SLC46A3        | CDS,Exon       |
| chr13 | 30801548  | 30815223  | - | Serum_circ_0303 | 5.00  | 13675 | 655  | KATNAL1        | CDS,Exon       |
| chr13 | 32899212  | 32900750  | + | Serum_circ_0304 | 4.29  | 1538  | 315  | BRCA2          | CDS,Exon       |
| chr13 | 33091993  | 33101669  | - | Serum_circ_0305 | 22.87 | 9676  | 513  | N4BP2L2        | CDS,Exon,5'UTR |
| chr13 | 40121369  | 40134440  | - | Serum_circ_0306 | 2.86  | 13071 | NA   | LHFP           | Intron         |
| chr13 | 40293372  | 40301685  | + | Serum_circ_0307 | 2.14  | 8313  | 542  | COG6           | CDS,Exon,5'UTR |
| chr13 | 41517087  | 41518061  | - | Serum_circ_0308 | 1.43  | 974   | 277  | ELF1           | CDS,Exon       |
| chr13 | 42040958  | 42042974  | + | Serum_circ_0309 | 6.43  | 2016  | 171  | RGCC           | CDS,Exon       |
| chr13 | 43528083  | 43544806  | - | Serum_circ_0310 | 3.57  | 16723 | 375  | EPST11         | CDS,Exon       |
| chr13 | 43639821  | 43659974  | + | Serum_circ_0311 | 3.57  | 20153 | 274  | DNAJC15        | CDS,Exon       |
| chr13 | 45725821  | 45781640  | + | Serum_circ_0312 | 3.57  | 55819 | 2346 | GTF2F2         | CDS,Exon       |
| chr13 | 47269027  | 47275342  | + | Serum_circ_0313 | 1.43  | 6315  | 280  | LRCH1          | CDS,Exon       |
| chr13 | 47297355  | 47308133  | + | Serum_circ_0314 | 2.86  | 10778 | 326  | LRCH1          | CDS,Exon       |
| chr13 | 48827943  | 48833083  | + | Serum_circ_0315 | 2.14  | 5140  | 598  | ITM2B          | CDS,Exon       |
| chr13 | 50025688  | 50026045  | + | Serum_circ_0316 | 1.43  | 357   | 357  | SETDB2         | CDS,Exon,5'UTR |
| chr13 | 50054354  | 50057699  | + | Serum_circ_0317 | 1.43  | 3345  | 613  | SETDB2         | CDS,Exon       |
| chr13 | 50140753  | 50141456  | - | Serum_circ_0318 | 1.43  | 703   | 318  | RCBTB1         | CDS,Exon,5'UTR |
| chr13 | 61013821  | 61041513  | + | Serum_circ_0319 | 5.00  | 27692 | 516  | TDRD3          | CDS,Exon,5'UTR |
| chr13 | 95686858  | 95735544  | - | Serum_circ_0320 | 2.86  | 48686 | 1335 | ABCC4          | CDS,Exon       |
| chr13 | 95768175  | 95822882  | - | Serum_circ_0321 | 5.72  | 54707 | 808  | ABCC4          | CDS,Exon       |
| chr13 | 95813442  | 95840796  | - | Serum_circ_0322 | 1.43  | 27354 | 1192 | ABCC4          | CDS,Exon       |
| chr13 | 95858785  | 95863035  | - | Serum_circ_0323 | 1.43  | 4250  | 630  | ABCC4          | CDS,Exon       |
| chr13 | 96375495  | 96377506  | + | Serum_circ_0324 | 2.86  | 2011  | 200  | DNAJC3         | CDS,Exon       |
| chr13 | 96409897  | 96416207  | + | Serum_circ_0325 | 4.29  | 6310  | 682  | DNAJC3         | CDS,Exon       |
| chr13 | 99134518  | 99171727  | - | Serum_circ_0326 | 4.29  | 37209 | 288  | STK24          | CDS,Exon       |
| chr13 | 99890680  | 99896878  | + | Serum_circ_0327 | 5.72  | 6198  | 358  | UBAC2          | CDS,Exon,5'UTR |
| chr13 | 100982814 | 100992513 | + | Serum_circ_0328 | 2.86  | 9699  | 214  | PCCA           | CDS,Exon       |
| chr13 | 100982814 | 101020828 | + | Serum_circ_0329 | 1.43  | 38014 | 317  | PCCA           | CDS,Exon       |
| chr13 | 103275226 | 103280274 | + | Serum_circ_0330 | 1.43  | 5048  | 396  | TPP2           | CDS,Exon       |
| chr13 | 113460526 | 113465040 | + | Serum_circ_0331 | 3.57  | 4514  | 189  | ATP11A         | CDS,Exon       |
| chr13 | 114773008 | 114795363 | - | Serum_circ_0332 | 5.00  | 22355 | 1370 | RASA3          | CDS,Exon       |
| chr13 | 114806475 | 114822949 | - | Serum_circ_0333 | 5.00  | 16474 | 199  | RASA3          | CDS,Exon       |
| chr14 | 23378691  | 23380612  | - | Serum_circ_0334 | 11.44 | 1921  | 189  | RBM23          | CDS,Exon,5'UTR |
| chr14 | 31103152  | 31107453  | + | Serum_circ_0335 | 1.43  | 4301  | 214  | SCFD1          | CDS,Exon,5'UTR |
| chr14 | 31185129  | 31204064  | + | Serum_circ_0336 | 1.43  | 18935 | 276  | SCFD1          | CDS,Exon       |
| chr14 | 31404368  | 31425448  | - | Serum_circ_0337 | 2.86  | 21080 | 706  | STRN3          | CDS,Exon       |
| chr14 | 31416295  | 31425448  | - | Serum_circ_0338 | 5.00  | 9153  | 434  | STRN3          | CDS,Exon       |
| chr14 | 31602443  | 31602881  | - | Serum_circ_0339 | 2.86  | 438   | 344  | HECTD1         | CDS,Exon       |
| chr14 | 35020919  | 35024118  | - | Serum_circ_0340 | 1.43  | 3199  | NA   | NA             | Intergenic     |
| chr14 | 35331249  | 35331528  | - | Serum_circ_0341 | 20.01 | 279   | 279  | BAZ1A          | CDS,Exon       |
| chr14 | 35438375  | 35441270  | - | Serum_circ_0342 | 2.86  | 2895  | NA   | ENST0000054945 | LncRNA         |
| chr14 | 35565763  | 35568590  | - | Serum_circ_0343 | 5.72  | 2827  | NA   | LOC101927178   | Antisense      |

|       |           |           |   |                 |      |       |      |                |                |
|-------|-----------|-----------|---|-----------------|------|-------|------|----------------|----------------|
| chr14 | 35568457  | 35579835  | - | Serum_circ_0344 | 5.72 | 11378 | NA   | LOC101927178   | Antisense      |
| chr14 | 39620949  | 39627606  | - | Serum_circ_0345 | 1.43 | 6657  | 296  | TRAPPC6B       | CDS,Exon       |
| chr14 | 39620949  | 39628754  | - | Serum_circ_0346 | 2.14 | 7805  | 364  | TRAPPC6B       | CDS,Exon       |
| chr14 | 39627488  | 39628754  | - | Serum_circ_0347 | 5.72 | 1266  | 186  | TRAPPC6B       | CDS,Exon       |
| chr14 | 39648294  | 39648666  | + | Serum_circ_0348 | 2.14 | 372   | 295  | PNN            | CDS,Exon       |
| chr14 | 39746137  | 39748741  | + | Serum_circ_0349 | 5.00 | 2604  | 265  | CTAGE5         | CDS,Exon,5'UTR |
| chr14 | 45587230  | 45599993  | - | Serum_circ_0350 | 4.29 | 12763 | 410  | FKBP3          | CDS,Exon       |
| chr14 | 45618039  | 45628483  | + | Serum_circ_0351 | 1.43 | 10444 | 822  | FANCM          | CDS,Exon       |
| chr14 | 50130032  | 50141145  | - | Serum_circ_0352 | 2.86 | 11113 | 510  | POLE2          | CDS,Exon       |
| chr14 | 50612194  | 50616948  | - | Serum_circ_0353 | 1.43 | 4754  | 343  | SOS2           | CDS,Exon       |
| chr14 | 53003436  | 53011089  | - | Serum_circ_0354 | 1.43 | 7653  | 573  | TXNDC16        | CDS,Exon,5'UTR |
| chr14 | 57051718  | 57092237  | + | Serum_circ_0355 | 2.86 | 40519 | 1238 | TMEM260        | CDS,Exon       |
| chr14 | 59747740  | 59758024  | + | Serum_circ_0356 | 1.43 | 10284 | 90   | DAAM1          | CDS,Exon       |
| chr14 | 61952219  | 61952374  | + | Serum_circ_0357 | 2.86 | 155   | 155  | PRKCH          | CDS,Exon       |
| chr14 | 65922338  | 65927869  | + | Serum_circ_0358 | 2.86 | 5531  | 98   | FUT8           | Exon,5'UTR     |
| chr14 | 66028054  | 66028484  | + | Serum_circ_0359 | 2.86 | 430   | 430  | FUT8           | CDS,Exon,5'UTR |
| chr14 | 66028054  | 66096324  | + | Serum_circ_0360 | 5.72 | 68270 | 824  | FUT8           | CDS,Exon,5'UTR |
| chr14 | 66082695  | 66096324  | + | Serum_circ_0361 | 3.57 | 13629 | 394  | FUT8           | CDS,Exon,5'UTR |
| chr14 | 67736417  | 67770316  | + | Serum_circ_0362 | 1.43 | 33899 | 1565 | MPP5           | CDS,Exon,5'UTR |
| chr14 | 67784124  | 67790529  | + | Serum_circ_0363 | 1.43 | 6405  | 554  | MPP5           | CDS,Exon       |
| chr14 | 68151731  | 68157138  | - | Serum_circ_0364 | 3.57 | 5407  | 400  | RDH11          | CDS,Exon       |
| chr14 | 69588933  | 69616220  | - | Serum_circ_0365 | 5.72 | 27287 | 144  | DCAF5          | CDS,Exon,5'UTR |
| chr14 | 70633355  | 70635201  | - | Serum_circ_0366 | 1.43 | 1846  | 1846 | SLC8A3         | CDS,Exon,5'UTR |
| chr14 | 73544076  | 73570186  | + | Serum_circ_0367 | 2.14 | 26110 | 998  | RBM25          | CDS,Exon       |
| chr14 | 73614502  | 73614802  | + | Serum_circ_0368 | 1.43 | 300   | 210  | PSEN1          | CDS,Exon,5'UTR |
| chr14 | 73614502  | 73614814  | + | Serum_circ_0369 | 1.43 | 312   | 350  | PSEN1          | CDS,Exon,5'UTR |
| chr14 | 76198680  | 76201632  | + | Serum_circ_0370 | 2.14 | 2952  | 239  | TTL5           | CDS,Exon       |
| chr14 | 77237532  | 77239554  | + | Serum_circ_0371 | 2.14 | 2022  | 132  | VASH1          | CDS,Exon       |
| chr14 | 77930940  | 77932010  | + | Serum_circ_0372 | 3.57 | 1070  | 218  | AHSA1          | CDS,Exon       |
| chr14 | 77987788  | 78018565  | - | Serum_circ_0373 | 3.57 | 30777 | 263  | SPTLC2         | CDS,Exon       |
| chr14 | 86815930  | 86816107  | - | Serum_circ_0374 | 1.43 | 177   | NA   | ENST0000053679 | LncRNA         |
| chr14 | 89041036  | 89044484  | + | Serum_circ_0375 | 3.57 | 3448  | 418  | ZC3H14         | CDS,Exon       |
| chr14 | 89041036  | 89076147  | + | Serum_circ_0376 | 2.14 | 35111 | 2269 | ZC3H14         | CDS,Exon,5'UTR |
| chr14 | 89628044  | 89629313  | - | Serum_circ_0377 | 1.43 | 1269  | NA   | FOXP3          | CDS,Exon       |
| chr14 | 91155883  | 91196540  | - | Serum_circ_0378 | 1.43 | 40657 | 374  | TTC7B          | CDS,Exon       |
| chr14 | 95606995  | 95608085  | - | Serum_circ_0379 | 2.86 | 1090  | 137  | DICER1         | Exon,5'UTR     |
| chr14 | 97299803  | 97327072  | + | Serum_circ_0380 | 2.14 | 27269 | 1073 | VRK1           | CDS,Exon,5'UTR |
| chr14 | 101015600 | 101015909 | - | Serum_circ_0381 | 2.86 | 309   | NA   | BEGAIN         | Intron         |
| chr14 | 102506572 | 102507010 | + | Serum_circ_0382 | 2.14 | 438   | 251  | DYNC1H1        | CDS,Exon       |
| chr14 | 102659799 | 102661457 | + | Serum_circ_0383 | 5.00 | 1658  | 248  | WDR20          | CDS,Exon,5'UTR |
| chr14 | 103918254 | 103923549 | + | Serum_circ_0384 | 3.57 | 5295  | 137  | MARK3          | CDS,Exon       |
| chr15 | 22940727  | 22947086  | + | Serum_circ_0385 | 4.29 | 6359  | 367  | CYFIP1         | CDS,Exon       |
| chr15 | 31245764  | 31260213  | - | Serum_circ_0386 | 4.29 | 14449 | 662  | MTMR10         | CDS,Exon       |
| chr15 | 41347444  | 41348904  | - | Serum_circ_0387 | 5.00 | 1460  | 203  | INO80          | CDS,Exon,3'UTR |
| chr15 | 41361767  | 41362745  | - | Serum_circ_0388 | 3.57 | 978   | 177  | INO80          | CDS,Exon,3'UTR |
| chr15 | 41669393  | 41672401  | + | Serum_circ_0389 | 3.57 | 3008  | 109  | NUSAP1         | CDS,Exon       |
| chr15 | 43250210  | 43262805  | - | Serum_circ_0390 | 3.57 | 12595 | 466  | UBR1           | CDS,Exon       |
| chr15 | 43692241  | 43694048  | + | Serum_circ_0391 | 7.86 | 1807  | 313  | TUBGCP4        | CDS,Exon       |
| chr15 | 44776421  | 44783197  | + | Serum_circ_0392 | 1.43 | 6776  | 505  | CTDSPL2        | CDS,Exon       |
| chr15 | 44898222  | 44903183  | - | Serum_circ_0393 | 4.29 | 4961  | 375  | SPG11          | CDS,Exon       |

|       |           |           |   |                 |       |       |      |          |                 |
|-------|-----------|-----------|---|-----------------|-------|-------|------|----------|-----------------|
| chr15 | 49528047  | 49531564  | + | Serum_circ_0394 | 10.01 | 3517  | 238  | GALK2    | CDS,Exon        |
| chr15 | 49528047  | 49584734  | + | Serum_circ_0395 | 3.57  | 56687 | 701  | GALK2    | CDS,Exon        |
| chr15 | 50264778  | 50288956  | - | Serum_circ_0396 | 1.43  | 24178 | 737  | ATP8B4   | CDS,Exon,3'UTR  |
| chr15 | 50763829  | 50769696  | + | Serum_circ_0397 | 2.86  | 5867  | 532  | USP8     | CDS,Exon        |
| chr15 | 50940883  | 50955243  | - | Serum_circ_0398 | 2.14  | 14360 | 318  | TRPM7    | CDS,Exon        |
| chr15 | 52161413  | 52194233  | + | Serum_circ_0399 | 4.29  | 32820 | 898  | TMOD3    | CDS,Exon        |
| chr15 | 52718026  | 52725482  | - | Serum_circ_0400 | 5.00  | 7456  | 428  | MYO5A    | CDS,Exon        |
| chr15 | 57445110  | 57445338  | - | Serum_circ_0401 | 5.00  | 228   | NA   | TCF12    | Antisense       |
| chr15 | 59143969  | 59144164  | + | Serum_circ_0402 | 6.43  | 195   | 195  | FAM63B   | CDS,Exon        |
| chr15 | 59204761  | 59205895  | - | Serum_circ_0403 | 5.00  | 1134  | 246  | SLTM     | CDS,Exon        |
| chr15 | 59383257  | 59384839  | + | Serum_circ_0404 | 3.57  | 1582  | 328  | RNF111   | CDS,Exon        |
| chr15 | 59399520  | 59399869  | + | Serum_circ_0405 | 4.29  | 349   | 243  | CCNB2    | CDS,Exon        |
| chr15 | 62299506  | 62306191  | - | Serum_circ_0406 | 7.86  | 6685  | 606  | VPS13C   | CDS,Exon        |
| chr15 | 64410315  | 64411053  | + | Serum_circ_0407 | 5.72  | 738   | 195  | SNX1     | CDS,Exon        |
| chr15 | 64543710  | 64592922  | - | Serum_circ_0408 | 1.43  | 49212 | 516  | CSNK1G1  | CDS,Exon,5'UTR  |
| chr15 | 64791491  | 64792365  | + | Serum_circ_0409 | 2.86  | 874   | NA   | NA       | Exon,CDS,Intron |
| chr15 | 65471271  | 65472542  | - | Serum_circ_0410 | 5.72  | 1271  | 279  | CLPX     | CDS,Exon        |
| chr15 | 65962116  | 65962526  | - | Serum_circ_0411 | 2.14  | 410   | 323  | DENND4A  | CDS,Exon        |
| chr15 | 66828270  | 66839043  | + | Serum_circ_0412 | 4.29  | 10773 | 461  | ZWILCH   | CDS,Exon,3'UTR  |
| chr15 | 67524151  | 67529158  | - | Serum_circ_0413 | 2.14  | 5007  | 462  | AAGAB    | CDS,Exon,5'UTR  |
| chr15 | 68434283  | 68439038  | + | Serum_circ_0414 | 2.14  | 4755  | 359  | PIAS1    | CDS,Exon        |
| chr15 | 72283443  | 72286926  | - | Serum_circ_0415 | 2.14  | 3483  | 252  | MYO9A    | CDS,Exon        |
| chr15 | 75146361  | 75146990  | - | Serum_circ_0416 | 2.14  | 629   | 168  | SCAMP2   | CDS,Exon        |
| chr15 | 76566752  | 76588078  | - | Serum_circ_0417 | 1.43  | 21326 | 777  | ETFA     | CDS,Exon        |
| chr15 | 76580186  | 76585041  | - | Serum_circ_0418 | 6.43  | 4855  | 265  | ETFA     | CDS,Exon        |
| chr15 | 76584771  | 76588078  | - | Serum_circ_0419 | 6.43  | 3307  | 312  | ETFA     | CDS,Exon        |
| chr15 | 78837210  | 78839040  | + | Serum_circ_0420 | 3.57  | 1830  | 344  | PSMA4    | CDS,Exon        |
| chr15 | 80412669  | 80415142  | + | Serum_circ_0421 | 7.86  | 2473  | 583  | ZFAND6   | CDS,Exon,5'UTR  |
| chr15 | 83788329  | 83796229  | + | Serum_circ_0422 | 2.86  | 7900  | 627  | TM6SF1   | CDS,Exon        |
| chr15 | 83819966  | 83832827  | - | Serum_circ_0423 | 2.14  | 12861 | 522  | HDGFRP3  | CDS,Exon        |
| chr15 | 89656955  | 89659752  | + | Serum_circ_0424 | 4.29  | 2797  | 300  | ABHD2    | CDS,Exon,5'UTR  |
| chr15 | 90431752  | 90432372  | - | Serum_circ_0425 | 7.15  | 620   | 292  | AP3S2    | CDS,Exon,3'UTR  |
| chr15 | 90451542  | 90451644  | - | Serum_circ_0426 | 2.14  | 102   | 102  | C15orf38 | CDS,Exon        |
| chr15 | 90760670  | 90763123  | + | Serum_circ_0427 | 3.57  | 2453  | 326  | SEMA4B   | CDS,Exon        |
| chr15 | 95025504  | 95025692  | + | Serum_circ_0428 | 5.00  | 188   | 188  | MCTP2    | Exon,3'UTR      |
| chr15 | 101104896 | 101105470 | - | Serum_circ_0429 | 5.72  | 574   | NA   | NA       | Intergenic      |
| chr15 | 101906400 | 101910728 | - | Serum_circ_0430 | 2.86  | 4328  | 326  | PCSK6    | CDS,Exon        |
| chr16 | 2369581   | 2369841   | - | Serum_circ_0431 | 7.86  | 260   | 260  | ABCA3    | CDS,Exon        |
| chr16 | 9009110   | 9011013   | - | Serum_circ_0432 | 2.14  | 1903  | 358  | USP7     | CDS,Exon        |
| chr16 | 14738130  | 14738466  | + | Serum_circ_0433 | 2.86  | 336   | 336  | BFAR     | CDS,Exon,5'UTR  |
| chr16 | 14758725  | 14758928  | + | Serum_circ_0434 | 1.43  | 203   | 203  | BFAR     | CDS,Exon        |
| chr16 | 15705448  | 15716980  | - | Serum_circ_0435 | 1.43  | 11532 | 1347 | KIAA0430 | CDS,Exon        |
| chr16 | 16200594  | 16205439  | + | Serum_circ_0436 | 2.86  | 4845  | 344  | ABCC1    | CDS,Exon        |
| chr16 | 18852886  | 18856973  | - | Serum_circ_0437 | 4.29  | 4087  | 700  | SMG1     | CDS,Exon        |
| chr16 | 21629185  | 21629395  | + | Serum_circ_0438 | 2.86  | 210   | 210  | METTL9   | CDS,Exon        |
| chr16 | 23999828  | 24046868  | + | Serum_circ_0439 | 10.72 | 47040 | 324  | PRKCB    | CDS,Exon        |
| chr16 | 24043456  | 24046868  | + | Serum_circ_0440 | 7.86  | 3412  | 241  | PRKCB    | CDS,Exon        |
| chr16 | 27224905  | 27226329  | + | Serum_circ_0441 | 3.57  | 1424  | 300  | KDM8     | CDS,Exon        |
| chr16 | 30490411  | 30490782  | + | Serum_circ_0442 | 2.14  | 371   | 249  | ITGAL    | CDS,Exon        |
| chr16 | 30715384  | 30715636  | + | Serum_circ_0443 | 3.57  | 252   | 252  | SRCAP    | CDS,Exon        |



|       |          |          |   |                 |        |       |      |                |                |
|-------|----------|----------|---|-----------------|--------|-------|------|----------------|----------------|
| chr16 | 53288349 | 53308214 | + | Serum_circ_0444 | 1.43   | 19865 | 1106 | CHD9           | CDS,Exon       |
| chr16 | 53301205 | 53308214 | + | Serum_circ_0445 | 5.00   | 7009  | 647  | CHD9           | CDS,Exon       |
| chr16 | 66642211 | 66643906 | + | Serum_circ_0446 | 6.43   | 1695  | 618  | CMTM3          | CDS,Exon,5'UTR |
| chr16 | 67650647 | 67650781 | + | Serum_circ_0447 | 2.14   | 134   | 134  | CTCF           | CDS,Exon,5'UTR |
| chr16 | 68155889 | 68160513 | + | Serum_circ_0448 | 3.57   | 4624  | 1298 | NFATC3         | CDS,Exon       |
| chr16 | 68191771 | 68217269 | + | Serum_circ_0449 | 2.14   | 25498 | 697  | NFATC3         | CDS,Exon       |
| chr16 | 69404385 | 69406258 | - | Serum_circ_0450 | 20.73  | 1873  | 234  | TERF2          | CDS,Exon       |
| chr16 | 70502751 | 70503226 | + | Serum_circ_0451 | 1.43   | 475   | 292  | FUK            | CDS,Exon       |
| chr16 | 71779046 | 71779517 | - | Serum_circ_0452 | 1.43   | 471   | 269  | AP1G1          | CDS,Exon       |
| chr16 | 72122885 | 72124685 | - | Serum_circ_0453 | 2.86   | 1800  | 321  | TXNL4B         | CDS,Exon,5'UTR |
| chr16 | 74670243 | 74671868 | - | Serum_circ_0454 | 2.14   | 1625  | 347  | RFWD3          | CDS,Exon       |
| chr16 | 83940591 | 83945972 | + | Serum_circ_0455 | 4.29   | 5381  | 420  | MLYCD          | CDS,Exon       |
| chr16 | 85667519 | 85667738 | + | Serum_circ_0456 | 125.80 | 219   | 219  | GSE1           | CDS,Exon       |
| chr16 | 88677675 | 88677944 | + | Serum_circ_0457 | 1.43   | 269   | 269  | ZC3H18         | CDS,Exon       |
| chr16 | 88958289 | 88968064 | - | Serum_circ_0458 | 2.14   | 9775  | 560  | CBFA2T3        | CDS,Exon,5'UTR |
| chr16 | 89484691 | 89497734 | - | Serum_circ_0459 | 7.15   | 13043 | 156  | ANKRD11        | CDS,Exon       |
| chr17 | 3969740  | 3976050  | - | Serum_circ_0460 | 10.01  | 6310  | 564  | ZZEF1          | CDS,Exon       |
| chr17 | 5250084  | 5253924  | + | Serum_circ_0461 | 1.43   | 3840  | 315  | RABEP1         | CDS,Exon       |
| chr17 | 5268416  | 5271763  | + | Serum_circ_0462 | 1.43   | 3347  | 216  | RABEP1         | CDS,Exon       |
| chr17 | 16004563 | 16005119 | - | Serum_circ_0463 | 5.00   | 556   | 1064 | NCOR1          | CDS,Exon       |
| chr17 | 16012099 | 16029523 | - | Serum_circ_0464 | 6.43   | 17424 | 673  | NCOR1          | CDS,Exon       |
| chr17 | 26490568 | 26499644 | + | Serum_circ_0465 | 12.15  | 9076  | 398  | NLK            | CDS,Exon       |
| chr17 | 26490568 | 26512291 | + | Serum_circ_0466 | 9.29   | 21723 | 485  | NLK            | CDS,Exon       |
| chr17 | 26512204 | 26519239 | + | Serum_circ_0467 | 2.86   | 7035  | 380  | NLK            | CDS,Exon       |
| chr17 | 27778472 | 27778698 | + | Serum_circ_0468 | 3.57   | 226   | 226  | TAOK1          | CDS,Exon,5'UTR |
| chr17 | 27778472 | 27794234 | + | Serum_circ_0469 | 4.29   | 15762 | 298  | TAOK1          | CDS,Exon,5'UTR |
| chr17 | 27778472 | 27809306 | + | Serum_circ_0470 | 1.43   | 30834 | 749  | TAOK1          | CDS,Exon,5'UTR |
| chr17 | 27844470 | 27844674 | + | Serum_circ_0471 | 2.86   | 204   | 204  | TAOK1          | CDS,Exon       |
| chr17 | 28011580 | 28030080 | - | Serum_circ_0472 | 7.15   | 18500 | 291  | SSH2           | CDS,Exon       |
| chr17 | 29185178 | 29192818 | + | Serum_circ_0473 | 2.86   | 7640  | 440  | ATAD5          | CDS,Exon       |
| chr17 | 29483000 | 29497015 | + | Serum_circ_0474 | 2.86   | 14015 | 526  | NF1            | CDS,Exon       |
| chr17 | 35800605 | 35802753 | + | Serum_circ_0475 | 2.14   | 2148  | 247  | TADA2A         | CDS,Exon       |
| chr17 | 35936438 | 35945538 | - | Serum_circ_0476 | 5.00   | 9100  | 530  | SYNRG          | CDS,Exon       |
| chr17 | 37707290 | 37723145 | + | Serum_circ_0477 | 2.14   | 15855 | NA   | TCONS_00025374 | LncRNA         |
| chr17 | 38551700 | 38552717 | - | Serum_circ_0478 | 2.86   | 1017  | 274  | TOP2A          | CDS,Exon       |
| chr17 | 40650941 | 40653322 | + | Serum_circ_0479 | 3.57   | 2381  | 444  | ATP6V0A1       | CDS,Exon       |
| chr17 | 40652724 | 40653322 | + | Serum_circ_0480 | 2.14   | 598   | 325  | ATP6V0A1       | CDS,Exon       |
| chr17 | 42453200 | 42453506 | - | Serum_circ_0481 | 4.29   | 306   | 153  | ITGA2B         | CDS,Exon       |
| chr17 | 44143902 | 44145033 | - | Serum_circ_0482 | 5.00   | 1131  | 315  | KANSL1         | CDS,Exon       |
| chr17 | 45412565 | 45456619 | + | Serum_circ_0483 | 2.14   | 44054 | 1391 | EFCAB13        | CDS,Exon       |
| chr17 | 45438743 | 45456619 | + | Serum_circ_0484 | 2.14   | 17876 | 921  | EFCAB13        | CDS,Exon       |
| chr17 | 47388673 | 47390207 | - | Serum_circ_0485 | 9.29   | 1534  | 409  | ZNF652         | CDS,Exon       |
| chr17 | 48814320 | 48824063 | + | Serum_circ_0486 | 2.14   | 9743  | 1039 | LUC7L3         | CDS,Exon       |
| chr17 | 49067810 | 49075978 | - | Serum_circ_0487 | 5.72   | 8168  | 953  | SPAG9          | CDS,Exon       |
| chr17 | 57165651 | 57181755 | - | Serum_circ_0488 | 2.86   | 16104 | 260  | TRIM37         | CDS,Exon       |
| chr17 | 61829299 | 61831878 | - | Serum_circ_0489 | 1.43   | 2579  | 423  | CCDC47         | CDS,Exon       |
| chr17 | 61841375 | 61842207 | - | Serum_circ_0490 | 2.86   | 832   | 283  | CCDC47         | CDS,Exon       |
| chr17 | 65887959 | 65890281 | + | Serum_circ_0491 | 5.72   | 2322  | 679  | BPTF           | CDS,Exon       |
| chr17 | 65941524 | 65972074 | + | Serum_circ_0492 | 4.29   | 30550 | 2514 | BPTF           | CDS,Exon       |
| chr17 | 70681458 | 70681585 | - | Serum_circ_0493 | 5.72   | 127   | NA   | SLC39A11       | Intron         |

|       |          |          |   |                 |       |       |      |          |                |
|-------|----------|----------|---|-----------------|-------|-------|------|----------|----------------|
| chr17 | 74554455 | 74554682 | + | Serum_circ_0494 | 3.57  | 227   | NA   | SNHG16   | Intron         |
| chr17 | 74763467 | 74765953 | + | Serum_circ_0495 | 8.58  | 2486  | 192  | MFS11    | CDS,Exon       |
| chr17 | 76396794 | 76397138 | + | Serum_circ_0496 | 8.58  | 344   | 344  | PGS1     | Exon,5'UTR     |
| chr17 | 80115623 | 80151706 | - | Serum_circ_0497 | 1.43  | 36083 | 1465 | CCDC57   | CDS,Exon       |
| chr18 | 2762102  | 2772370  | + | Serum_circ_0498 | 4.29  | 10268 | 741  | SMCHD1   | CDS,Exon       |
| chr18 | 9177333  | 9211782  | + | Serum_circ_0499 | 1.43  | 34449 | 703  | ANKRD12  | CDS,Exon,5'UTR |
| chr18 | 9182379  | 9221997  | + | Serum_circ_0500 | 6.43  | 39618 | 994  | ANKRD12  | CDS,Exon,5'UTR |
| chr18 | 9577061  | 9595151  | - | Serum_circ_0501 | 1.43  | 18090 | 1079 | PPP4R1   | CDS,Exon,3'UTR |
| chr18 | 18600111 | 18624147 | - | Serum_circ_0502 | 2.14  | 24036 | 771  | ROCK1    | CDS,Exon       |
| chr18 | 20569183 | 20602233 | + | Serum_circ_0503 | 3.57  | 33050 | 1887 | RBBP8    | CDS,Exon       |
| chr18 | 21644103 | 21649235 | + | Serum_circ_0504 | 5.72  | 5132  | 293  | TTC39C   | CDS,Exon,5'UTR |
| chr18 | 26091852 | 26091991 | + | Serum_circ_0505 | 1.43  | 139   | NA   | NA       | Intergenic     |
| chr18 | 39607406 | 39629569 | + | Serum_circ_0506 | 7.86  | 22163 | 779  | PIK3C3   | CDS,Exon       |
| chr18 | 39623696 | 39629569 | + | Serum_circ_0507 | 7.15  | 5873  | 160  | PIK3C3   | CDS,Exon       |
| chr18 | 39644703 | 39647477 | + | Serum_circ_0508 | 6.43  | 2774  | 217  | PIK3C3   | CDS,Exon       |
| chr18 | 42281139 | 42281797 | + | Serum_circ_0509 | 5.00  | 658   | 658  | SETBP1   | CDS,Exon,5'UTR |
| chr18 | 43698146 | 43700026 | + | Serum_circ_0510 | 2.14  | 1880  | 271  | HAUS1    | CDS,Exon,5'UTR |
| chr18 | 44470542 | 44483598 | - | Serum_circ_0511 | 2.14  | 13056 | 475  | PIAS2    | CDS,Exon       |
| chr18 | 45391429 | 45423180 | - | Serum_circ_0512 | 7.15  | 31751 | 783  | SMAD2    | CDS,Exon,5'UTR |
| chr18 | 51797729 | 51800460 | + | Serum_circ_0513 | 2.14  | 2731  | 291  | POLI     | CDS,Exon       |
| chr18 | 51797729 | 51804225 | + | Serum_circ_0514 | 3.57  | 6496  | 444  | POLI     | CDS,Exon       |
| chr18 | 51804072 | 51813781 | + | Serum_circ_0515 | 4.29  | 9709  | 792  | POLI     | CDS,Exon       |
| chr18 | 52544797 | 52555349 | + | Serum_circ_0516 | 5.00  | 10552 | 486  | RAB27B   | CDS,Exon,5'UTR |
| chr18 | 53017589 | 53018234 | - | Serum_circ_0517 | 3.57  | 645   | 307  | TCF4     | CDS,Exon,5'UTR |
| chr18 | 55361813 | 55371900 | - | Serum_circ_0518 | 11.44 | 10087 | 750  | ATP8B1   | CDS,Exon       |
| chr18 | 56363597 | 56367823 | + | Serum_circ_0519 | 2.14  | 4226  | 273  | MALT1    | CDS,Exon       |
| chr18 | 66564455 | 66564919 | + | Serum_circ_0520 | 3.57  | 464   | 210  | CCDC102B | CDS,Exon       |
| chr18 | 67540379 | 67563281 | - | Serum_circ_0521 | 3.57  | 22902 | 448  | CD226    | CDS,Exon       |
| chr18 | 67562936 | 67577838 | - | Serum_circ_0522 | 5.00  | 14902 | 345  | CD226    | CDS,Exon       |
| chr18 | 67613969 | 67614669 | - | Serum_circ_0523 | 10.01 | 700   | 409  | CD226    | CDS,Exon,5'UTR |
| chr18 | 74561481 | 74563895 | + | Serum_circ_0524 | 2.14  | 2414  | 308  | ZNF236   | CDS,Exon       |
| chr19 | 1090906  | 1091906  | - | Serum_circ_0525 | 4.29  | 1000  | 197  | POLR2E   | CDS,Exon       |
| chr19 | 3660963  | 3661999  | - | Serum_circ_0526 | 1.43  | 1036  | 249  | PIP5K1C  | CDS,Exon       |
| chr19 | 8520288  | 8528570  | + | Serum_circ_0527 | 1.43  | 8282  | 325  | HNRNPM   | CDS,Exon       |
| chr19 | 8612919  | 8613201  | - | Serum_circ_0528 | 7.15  | 282   | 168  | MYO1F    | CDS,Exon       |
| chr19 | 10736928 | 10742627 | + | Serum_circ_0529 | 4.29  | 5699  | 673  | SLC44A2  | CDS,Exon       |
| chr19 | 11548696 | 11548945 | + | Serum_circ_0530 | 5.00  | 249   | 154  | PRKCSH   | CDS,Exon       |
| chr19 | 12355395 | 12361183 | - | Serum_circ_0531 | 1.43  | 5788  | NA   | NA       | Intergenic     |
| chr19 | 13039155 | 13039661 | - | Serum_circ_0532 | 1.43  | 506   | 338  | FARSA    | CDS,Exon       |
| chr19 | 14153264 | 14153601 | + | Serum_circ_0533 | 1.43  | 337   | 234  | IL27RA   | CDS,Exon       |
| chr19 | 18258252 | 18258434 | + | Serum_circ_0534 | 8.58  | 182   | 182  | MAST3    | CDS,Exon       |
| chr19 | 18684102 | 18684558 | + | Serum_circ_0535 | 2.14  | 456   | 198  | UBA52    | CDS,Exon,5'UTR |
| chr19 | 27733209 | 27736950 | + | Serum_circ_0536 | 1.43  | 3741  | NA   | NA       | Intergenic     |
| chr19 | 30476129 | 30477324 | + | Serum_circ_0537 | 9.29  | 1195  | 215  | URI1     | CDS,Exon,5'UTR |
| chr19 | 38631823 | 38633350 | + | Serum_circ_0538 | 2.86  | 1527  | 390  | SIPA1L3  | CDS,Exon       |
| chr19 | 39001137 | 39001421 | + | Serum_circ_0539 | 5.72  | 284   | 190  | RYR1     | CDS,Exon       |
| chr19 | 40743875 | 40746017 | - | Serum_circ_0540 | 3.57  | 2142  | 258  | AKT2     | CDS,Exon       |
| chr19 | 41089303 | 41089623 | + | Serum_circ_0541 | 3.57  | 320   | 205  | SHKBP1   | CDS,Exon       |
| chr19 | 41847787 | 41848152 | - | Serum_circ_0542 | 10.72 | 365   | 226  | TGFB1    | CDS,Exon       |
| chr19 | 45528586 | 45528995 | + | Serum_circ_0543 | 5.00  | 409   | 224  | RELB     | CDS,Exon       |

|       |          |          |   |                 |       |       |      |           |                               |
|-------|----------|----------|---|-----------------|-------|-------|------|-----------|-------------------------------|
| chr19 | 49473802 | 49474280 | - | Serum_circ_0544 | 1.43  | 478   | 260  | GYS1      | CDS,Exon,3'UTR                |
| chr19 | 55530843 | 55536639 | - | Serum_circ_0545 | 2.86  | 5796  | 54   | GP6       | CDS,Exon                      |
| chr19 | 55921103 | 55921685 | + | Serum_circ_0546 | 1.43  | 582   | NA   | NA        | Intergenic                    |
| chr19 | 57967020 | 57967550 | - | Serum_circ_0547 | 3.57  | 530   | 530  | VN1R1     | CDS,Exon                      |
| chr19 | 58057824 | 58059361 | - | Serum_circ_0548 | 2.86  | 1537  | 1699 | ZNF550    | CDS,Exon,3'UTR                |
| chr2  | 605066   | 605228   | - | Serum_circ_0549 | 2.14  | 162   | NA   | NA        | Intergenic                    |
| chr2  | 2784707  | 2784825  | - | Serum_circ_0550 | 1.43  | 118   | NA   | NA        | Intergenic                    |
| chr2  | 9022640  | 9098771  | - | Serum_circ_0551 | 1.43  | 76131 | 431  | MBOAT2    | CDS,Exon                      |
| chr2  | 9028147  | 9098771  | - | Serum_circ_0552 | 3.57  | 70624 | 376  | MBOAT2    | CDS,Exon                      |
| chr2  | 9048750  | 9098771  | - | Serum_circ_0553 | 17.16 | 50021 | 320  | MBOAT2    | CDS,Exon                      |
| chr2  | 9079949  | 9098771  | - | Serum_circ_0554 | 1.43  | 18822 | 224  | MBOAT2    | CDS,Exon                      |
| chr2  | 9083315  | 9098771  | - | Serum_circ_0555 | 38.60 | 15456 | 224  | MBOAT2    | CDS,Exon                      |
| chr2  | 9458652  | 9463379  | + | Serum_circ_0556 | 1.43  | 4727  | 255  | ASAP2     | CDS,Exon                      |
| chr2  | 9484660  | 9491024  | + | Serum_circ_0557 | 5.00  | 6364  | 262  | ASAP2     | CDS,Exon                      |
| chr2  | 9490936  | 9508648  | + | Serum_circ_0558 | 2.14  | 17712 | 533  | ASAP2     | CDS,Exon                      |
| chr2  | 9496175  | 9499018  | + | Serum_circ_0559 | 2.86  | 2843  | 350  | ASAP2     | CDS,Exon                      |
| chr2  | 10799297 | 10808849 | - | Serum_circ_0560 | 5.00  | 9552  | 292  | NOL10     | CDS,Exon,3'UTR                |
| chr2  | 11426664 | 11427862 | - | Serum_circ_0561 | 5.00  | 1198  | 183  | ROCK2     | CDS,Exon                      |
| chr2  | 15492115 | 15496540 | - | Serum_circ_0562 | 3.57  | 4425  | 362  | NBAS      | CDS,Exon,3'UTR                |
| chr2  | 17884423 | 17927218 | - | Serum_circ_0563 | 2.14  | 42795 | 2147 | SMC6      | CDS,Exon,5'UTR                |
| chr2  | 20478343 | 20478580 | - | Serum_circ_0564 | 6.43  | 237   | 237  | PUM2      | CDS,Exon                      |
| chr2  | 24046127 | 24046439 | - | Serum_circ_0565 | 4.29  | 312   | 312  | ATAD2B    | CDS,Exon                      |
| chr2  | 24181170 | 24199945 | + | Serum_circ_0566 | 2.14  | 18775 | 301  | UBXN2A    | CDS,Exon,5'UTR                |
| chr2  | 24357988 | 24369956 | + | Serum_circ_0567 | 3.57  | 11968 | 587  | FAM228B   | CDS,Exon,5'UTR                |
| chr2  | 24357988 | 24384483 | + | Serum_circ_0568 | 2.14  | 26495 | 695  | FAM228B   | CDS,Exon,5'UTR                |
| chr2  | 24516556 | 24518673 | - | Serum_circ_0569 | 1.43  | 2117  | 229  | ITSN2     | CDS,Exon                      |
| chr2  | 26321530 | 26332775 | + | Serum_circ_0570 | 6.43  | 11245 | 200  | RAB10     | CDS,Exon                      |
| chr2  | 32352016 | 32353548 | + | Serum_circ_0571 | 2.14  | 1532  | 147  | SPAST     | CDS,Exon                      |
| chr2  | 32602655 | 32614011 | + | Serum_circ_0572 | 1.43  | 11356 | 514  | BIRC6     | CDS,Exon                      |
| chr2  | 32716491 | 32718734 | + | Serum_circ_0573 | 3.57  | 2243  | 262  | BIRC6     | CDS,Exon                      |
| chr2  | 32858942 | 32865477 | + | Serum_circ_0574 | 1.43  | 6535  | 348  | TTC27     | CDS,Exon,5'UTR                |
| chr2  | 33359859 | 33413918 | + | Serum_circ_0575 | 5.72  | 54059 | 668  | LTBP1     | CDS,Exon                      |
| chr2  | 33359859 | 33447218 | + | Serum_circ_0576 | 13.58 | 87359 | 843  | LTBP1     | CDS,Exon                      |
| chr2  | 33411922 | 33447218 | + | Serum_circ_0577 | 2.14  | 35296 | 675  | LTBP1     | CDS,Exon                      |
| chr2  | 33442618 | 33447218 | + | Serum_circ_0578 | 8.58  | 4600  | 175  | LTBP1     | CDS,Exon                      |
| chr2  | 33488360 | 33518349 | + | Serum_circ_0579 | 1.43  | 29989 | 717  | LTBP1     | CDS,Exon                      |
| chr2  | 37259771 | 37268435 | - | Serum_circ_0580 | 2.14  | 8664  | 665  | HEATR5B   | CDS,Exon                      |
| chr2  | 37276795 | 37284623 | - | Serum_circ_0581 | 2.86  | 7828  | 637  | HEATR5B   | CDS,Exon                      |
| chr2  | 37426846 | 37428869 | + | Serum_circ_0582 | 2.14  | 2023  | 246  | CEBPZ-AS1 | Exon,5'UTR<br>Exon,CDS,3'UTR  |
| chr2  | 37543379 | 37544322 | - | Serum_circ_0583 | 2.86  | 943   | NA   | NA        | ,Intergenic<br>Exon,CDS,3'UTR |
| chr2  | 37543379 | 37545042 | - | Serum_circ_0584 | 1.43  | 1663  | NA   | NA        | ,Intergenic                   |
| chr2  | 38903053 | 38903208 | + | Serum_circ_0585 | 1.43  | 155   | 155  | GALM      | CDS,Exon                      |
| chr2  | 39233552 | 39237844 | - | Serum_circ_0586 | 2.86  | 4292  | 401  | SOS1      | CDS,Exon                      |
| chr2  | 39559057 | 39564722 | - | Serum_circ_0587 | 1.43  | 5665  | 220  | MAP4K3    | CDS,Exon                      |
| chr2  | 40655612 | 40657444 | - | Serum_circ_0588 | 7.15  | 1832  | 1832 | SLC8A1    | CDS,Exon,5'UTR                |
| chr2  | 42543101 | 42544664 | + | Serum_circ_0589 | 7.15  | 1563  | 187  | EML4      | CDS,Exon                      |
| chr2  | 44436348 | 44445676 | + | Serum_circ_0590 | 2.14  | 9328  | 511  | PPM1B     | CDS,Exon,5'UTR                |
| chr2  | 44436348 | 44436466 | + | Serum_circ_0591 | 3.57  | 118   | 118  | PPM1B     | CDS,Exon,5'UTR                |
| chr2  | 44729827 | 44732869 | + | Serum_circ_0592 | 4.29  | 3042  | NA   | CAMKMT    | Intron                        |
| chr2  | 54114395 | 54120936 | - | Serum_circ_0593 | 1.43  | 6541  | 817  | PSME4     | CDS,Exon                      |

|      |           |           |   |                 |       |       |      |           |                           |
|------|-----------|-----------|---|-----------------|-------|-------|------|-----------|---------------------------|
| chr2 | 58285486  | 58285623  | + | Serum_circ_0594 | 2.14  | 137   | 137  | VRK2      | Exon,5'UTR                |
| chr2 | 58449076  | 58459247  | - | Serum_circ_0595 | 2.14  | 10171 | 278  | FANCL     | CDS,Exon                  |
| chr2 | 61118817  | 61128218  | + | Serum_circ_0596 | 2.86  | 9401  | 384  | REL       | CDS,Exon                  |
| chr2 | 61343113  | 61345251  | + | Serum_circ_0597 | 7.15  | 2138  | 284  | KIAA1841  | CDS,Exon                  |
| chr2 | 61719169  | 61724142  | - | Serum_circ_0598 | 5.00  | 4973  | 1128 | XPO1      | CDS,Exon                  |
| chr2 | 61721028  | 61722748  | - | Serum_circ_0599 | 5.00  | 1720  | 357  | XPO1      | CDS,Exon                  |
| chr2 | 61749745  | 61753656  | - | Serum_circ_0600 | 17.87 | 3911  | 175  | XPO1      | CDS,Exon                  |
| chr2 | 61749745  | 61761038  | - | Serum_circ_0601 | 5.00  | 11293 | 307  | XPO1      | CDS,Exon,5'UTR            |
| chr2 | 64083439  | 64090062  | + | Serum_circ_0602 | 10.01 | 6623  | 236  | UGP2      | CDS,Exon,5'UTR            |
| chr2 | 64083439  | 64085070  | + | Serum_circ_0603 | 2.14  | 1631  | 236  | UGP2      | CDS,Exon,5'UTR            |
| chr2 | 64800079  | 64812679  | + | Serum_circ_0604 | 1.43  | 12600 | 392  | AFTPH     | CDS,Exon                  |
| chr2 | 65318116  | 65331940  | - | Serum_circ_0605 | 5.72  | 13824 | 265  | RAB1A     | CDS,Exon                  |
| chr2 | 66691240  | 66775151  | + | Serum_circ_0606 | 3.57  | 83911 | 335  | MEIS1     | CDS,Exon                  |
| chr2 | 68717321  | 68765359  | + | Serum_circ_0607 | 4.29  | 48038 | 1064 | APLF      | CDS,Exon                  |
| chr2 | 68717321  | 68772444  | + | Serum_circ_0608 | 5.72  | 55123 | 1190 | APLF      | CDS,Exon                  |
| chr2 | 68740211  | 68742868  | + | Serum_circ_0609 | 2.14  | 2657  | 281  | APLF      | CDS,Exon                  |
| chr2 | 68794472  | 68805135  | + | Serum_circ_0610 | 2.14  | 10663 | 47   | APLF      | CDS,Exon                  |
| chr2 | 69583627  | 69590802  | - | Serum_circ_0611 | 1.43  | 7175  | 382  | GFPT1     | CDS,Exon                  |
| chr2 | 72945231  | 72960247  | - | Serum_circ_0612 | 1.43  | 15016 | 390  | EXOC6B    | CDS,Exon                  |
| chr2 | 85097348  | 85097909  | - | Serum_circ_0613 | 1.43  | 561   | 561  | TRABD2A   | CDS,Exon                  |
| chr2 | 85864491  | 85872206  | + | Serum_circ_0614 | 5.72  | 7715  | 536  | USP39     | CDS,Exon,5'UTR            |
| chr2 | 86386658  | 86389202  | - | Serum_circ_0615 | 5.00  | 2544  | 240  | IMMT      | CDS,Exon                  |
| chr2 | 98430433  | 98435184  | - | Serum_circ_0616 | 1.43  | 4751  | 543  | TMEM131   | CDS,Exon                  |
| chr2 | 99720429  | 99734222  | - | Serum_circ_0617 | 2.86  | 13793 | 966  | TSGA10    | CDS,Exon,5'UTR            |
| chr2 | 99786012  | 99787892  | - | Serum_circ_0618 | 4.29  | 1880  | 264  | MITD1     | CDS,Exon                  |
| chr2 | 99802639  | 99804720  | + | Serum_circ_0619 | 4.29  | 2081  | 159  | MRPL30    | CDS,Exon,5'UTR            |
| chr2 | 101874252 | 101879153 | + | Serum_circ_0620 | 2.14  | 4901  | 318  | CNOT11    | CDS,Exon                  |
| chr2 | 102988412 | 102998142 | + | Serum_circ_0621 | 1.43  | 9730  | 443  | IL18R1    | CDS,Exon,5'UTR            |
| chr2 | 106739425 | 106782539 | - | Serum_circ_0622 | 1.43  | 43114 | 1421 | UXS1      | CDS,Exon                  |
| chr2 | 107446521 | 107450602 | - | Serum_circ_0623 | 2.86  | 4081  | 375  | ST6GAL2   | CDS,Exon                  |
| chr2 | 109405307 | 109432561 | + | Serum_circ_0624 | 2.14  | 27254 | 1055 | CCDC138   | CDS,Exon                  |
| chr2 | 109945679 | 109964405 | + | Serum_circ_0625 | 1.43  | 18726 | 276  | SH3RF3    | CDS,Exon                  |
| chr2 | 113057425 | 113057606 | + | Serum_circ_0626 | 5.72  | 181   | 181  | ZC3H6     | CDS,Exon                  |
| chr2 | 120677644 | 120692534 | + | Serum_circ_0627 | 1.43  | 14890 | 527  | PTPN4     | CDS,Exon                  |
| chr2 | 122104613 | 122120876 | - | Serum_circ_0628 | 2.86  | 16263 | 453  | CLASP1    | CDS,Exon                  |
| chr2 | 122215262 | 122216551 | - | Serum_circ_0629 | 3.57  | 1289  | 207  | CLASP1    | CDS,Exon                  |
| chr2 | 128520635 | 128528578 | - | Serum_circ_0630 | 2.14  | 7943  | 747  | WDR33     | CDS,Exon,5'UTR            |
| chr2 | 128757314 | 128758028 | - | Serum_circ_0631 | 5.00  | 714   | 344  | SAP130    | CDS,Exon                  |
| chr2 | 128855002 | 128867320 | + | Serum_circ_0632 | 1.43  | 12318 | 463  | UGGT1     | CDS,Exon,5'UTR            |
| chr2 | 128910357 | 128922399 | + | Serum_circ_0633 | 3.57  | 12042 | 905  | UGGT1     | CDS,Exon,5'UTR            |
| chr2 | 133013091 | 133013258 | - | Serum_circ_0634 | 2.14  | 167   | NA   | ANKRD30BL | Intron                    |
| chr2 | 135075099 | 135076310 | + | Serum_circ_0635 | 2.86  | 1211  | 167  | MGAT5     | CDS,Exon                  |
| chr2 | 136505836 | 136519481 | + | Serum_circ_0636 | 3.57  | 13645 | 520  | UBXN4     | CDS,Exon                  |
| chr2 | 144966169 | 144969146 | - | Serum_circ_0637 | 9.29  | 2977  | 267  | GTDC1     | CDS,Exon,5'UTR            |
| chr2 | 144966169 | 144993304 | - | Serum_circ_0638 | 5.72  | 27135 | 412  | GTDC1     | CDS,Exon,5'UTR            |
| chr2 | 148653869 | 148657467 | + | Serum_circ_0639 | 15.01 | 3598  | 618  | ACVR2A    | CDS,Exon,5'UTR            |
| chr2 | 148730307 | 148733544 | - | Serum_circ_0640 | 7.15  | 3237  | 242  | ORC4      | CDS,Exon,5'UTR            |
| chr2 | 148730307 | 148739650 | - | Serum_circ_0641 | 8.58  | 9343  | 396  | ORC4      | CDS,Exon,5'UTR            |
| chr2 | 150325158 | 150342859 | + | Serum_circ_0642 | 3.57  | 17701 | NA   | NA        | Exon,CDS,3'UTR,Intergenic |
| chr2 | 159488264 | 159497271 | + | Serum_circ_0643 | 2.86  | 9007  | 542  | PKP4      | CDS,Exon                  |

|       |           |           |   |                 |       |       |      |          |                |
|-------|-----------|-----------|---|-----------------|-------|-------|------|----------|----------------|
| chr2  | 159850218 | 159850347 | - | Serum_circ_0644 | 5.00  | 129   | NA   | TANC1    | Antisense      |
| chr2  | 160585519 | 160609082 | + | Serum_circ_0645 | 5.72  | 23563 | 1989 | 7-Mar    | CDS,Exon,5'UTR |
| chr2  | 168869143 | 168873605 | - | Serum_circ_0646 | 1.43  | 4462  | 122  | STK39    | CDS,Exon       |
| chr2  | 168986050 | 168997268 | - | Serum_circ_0647 | 6.43  | 11218 | 461  | STK39    | CDS,Exon       |
| chr2  | 171867882 | 171906684 | - | Serum_circ_0648 | 1.43  | 38802 | 684  | TLK1     | CDS,Exon       |
| chr2  | 172305190 | 172325540 | + | Serum_circ_0649 | 1.43  | 20350 | 660  | DCAF17   | CDS,Exon,5'UTR |
| chr2  | 172569276 | 172573035 | + | Serum_circ_0650 | 2.14  | 3759  | 176  | DYNC1I2  | CDS,Exon       |
| chr2  | 173426947 | 173429801 | + | Serum_circ_0651 | 5.00  | 2854  | 413  | PDK1     | CDS,Exon,5'UTR |
| chr2  | 180036846 | 180041265 | - | Serum_circ_0652 | 1.43  | 4419  | 205  | SESTD1   | CDS,Exon       |
| chr2  | 183831943 | 183853914 | - | Serum_circ_0653 | 5.72  | 21971 | 838  | NCKAP1   | CDS,Exon       |
| chr2  | 190656515 | 190682906 | + | Serum_circ_0654 | 1.43  | 26391 | 602  | PMS1     | CDS,Exon,5'UTR |
| chr2  | 198274493 | 198274731 | - | Serum_circ_0655 | 2.14  | 238   | 238  | SF3B1    | CDS,Exon       |
| chr2  | 201718625 | 201719809 | - | Serum_circ_0656 | 1.43  | 1184  | 254  | CLK1     | CDS,Exon,3'UTR |
| chr2  | 201721404 | 201721708 | - | Serum_circ_0657 | 15.73 | 304   | 225  | CLK1     | CDS,Exon,3'UTR |
| chr2  | 201750420 | 201752408 | - | Serum_circ_0658 | 2.14  | 1988  | 148  | PPIL3    | CDS,Exon,5'UTR |
| chr2  | 202010100 | 202014558 | + | Serum_circ_0659 | 17.87 | 4458  | 508  | CFLAR    | CDS,Exon,5'UTR |
| chr2  | 202195192 | 202195556 | - | Serum_circ_0660 | 3.57  | 364   | 151  | ALS2CR12 | CDS,Exon,3'UTR |
| chr2  | 202589017 | 202590177 | - | Serum_circ_0661 | 2.14  | 1160  | 264  | ALS2     | CDS,Exon       |
| chr2  | 203329531 | 203332412 | + | Serum_circ_0662 | 12.15 | 2881  | 342  | BMPR2    | CDS,Exon       |
| chr2  | 203817281 | 203820481 | + | Serum_circ_0663 | 3.57  | 3200  | 336  | CARF     | CDS,Exon       |
| chr2  | 204110568 | 204111644 | + | Serum_circ_0664 | 2.86  | 1076  | 217  | CYP20A1  | CDS,Exon       |
| chr2  | 209209834 | 209212747 | + | Serum_circ_0665 | 4.29  | 2913  | 347  | PIKFYVE  | CDS,Exon       |
| chr2  | 211018218 | 211019335 | - | Serum_circ_0666 | 1.43  | 1117  | 1117 | KANSL1L  | CDS,Exon,5'UTR |
| chr2  | 219114086 | 219114644 | + | Serum_circ_0667 | 4.29  | 558   | 202  | ARPC2    | CDS,Exon       |
| chr2  | 219445283 | 219445463 | + | Serum_circ_0668 | 5.72  | 180   | 180  | RQCD1    | CDS,Exon,5'UTR |
| chr2  | 220011401 | 220012517 | - | Serum_circ_0669 | 2.14  | 1116  | 198  | NHEJ1    | CDS,Exon       |
| chr2  | 227729319 | 227732034 | + | Serum_circ_0670 | 7.15  | 2715  | 656  | RHBDD1   | CDS,Exon,5'UTR |
| chr2  | 227771508 | 227779067 | + | Serum_circ_0671 | 1.43  | 7559  | 290  | RHBDD1   | CDS,Exon       |
| chr2  | 228356262 | 228389631 | + | Serum_circ_0672 | 2.86  | 33369 | 527  | AGFG1    | CDS,Exon       |
| chr2  | 230678585 | 230680024 | - | Serum_circ_0673 | 1.43  | 1439  | 387  | TRIP12   | CDS,Exon       |
| chr2  | 239090705 | 239092754 | - | Serum_circ_0674 | 2.14  | 2049  | 304  | ILKAP    | CDS,Exon       |
| chr2  | 239093650 | 239093928 | - | Serum_circ_0675 | 2.14  | 278   | 107  | ILKAP    | CDS,Exon       |
| chr2  | 240929490 | 240946787 | - | Serum_circ_0676 | 2.86  | 17297 | 250  | NDUFA10  | CDS,Exon       |
| chr2  | 240929490 | 240954277 | - | Serum_circ_0677 | 3.57  | 24787 | 452  | NDUFA10  | CDS,Exon       |
| chr20 | 1764710   | 1764874   | + | Serum_circ_0678 | 7.15  | 164   | NA   | NA       | Intergenic     |
| chr20 | 2866935   | 2869447   | + | Serum_circ_0679 | 1.43  | 2512  | NA   | PTPRA    | Intron         |
| chr20 | 2944917   | 2945848   | + | Serum_circ_0680 | 14.30 | 931   | 421  | PTPRA    | CDS,Exon,5'UTR |
| chr20 | 3542922   | 3556595   | + | Serum_circ_0681 | 2.14  | 13673 | 767  | ATRN     | CDS,Exon       |
| chr20 | 5157293   | 5159602   | + | Serum_circ_0682 | 2.86  | 2309  | 238  | CDS2     | CDS,Exon       |
| chr20 | 5538590   | 5539465   | - | Serum_circ_0683 | 2.14  | 875   | 297  | GPCPD1   | CDS,Exon       |
| chr20 | 5585009   | 5585976   | - | Serum_circ_0684 | 5.72  | 967   | 77   | GPCPD1   | CDS,Exon,5'UTR |
| chr20 | 25666202  | 25667102  | - | Serum_circ_0685 | 4.29  | 900   | 299  | ZNF337   | CDS,Exon,5'UTR |
| chr20 | 30954186  | 30956926  | + | Serum_circ_0686 | 10.72 | 2740  | 195  | ASXL1    | CDS,Exon       |
| chr20 | 31954664  | 31958435  | - | Serum_circ_0687 | 2.14  | 3771  | 428  | CDK5RAP1 | CDS,Exon       |
| chr20 | 33057852  | 33069011  | + | Serum_circ_0688 | 5.00  | 11159 | 669  | ITCH     | CDS,Exon       |
| chr20 | 34389412  | 34446303  | + | Serum_circ_0689 | 1.43  | 56891 | 452  | PHF20    | CDS,Exon,5'UTR |
| chr20 | 34487291  | 34487570  | + | Serum_circ_0690 | 3.57  | 279   | 279  | PHF20    | CDS,Exon       |
| chr20 | 35695126  | 35696589  | - | Serum_circ_0691 | 2.86  | 1463  | 556  | RBL1     | CDS,Exon       |
| chr20 | 35835675  | 35838568  | + | Serum_circ_0692 | 4.29  | 2893  | 296  | RPN2     | CDS,Exon       |
| chr20 | 37159809  | 37161502  | + | Serum_circ_0693 | 4.29  | 1693  | 195  | RALGAPB  | CDS,Exon       |

|       |          |          |   |                 |       |       |     |                             |                |
|-------|----------|----------|---|-----------------|-------|-------|-----|-----------------------------|----------------|
| chr20 | 37620096 | 37623523 | + | Serum_circ_0694 | 2.86  | 3427  | 192 | DHX35                       | CDS,Exon,5'UTR |
| chr20 | 40161688 | 40179999 | - | Serum_circ_0695 | 5.72  | 18311 | 577 | CHD6                        | CDS,Exon,5'UTR |
| chr20 | 44477088 | 44477314 | - | Serum_circ_0696 | 3.57  | 226   | 226 | ACOT8                       | CDS,Exon       |
| chr20 | 45121320 | 45125591 | - | Serum_circ_0697 | 3.57  | 4271  | NA  | NA                          | Intergenic     |
| chr20 | 45855945 | 45865260 | - | Serum_circ_0698 | 7.15  | 9315  | 351 | ZMYND8                      | CDS,Exon       |
| chr20 | 45874751 | 45875261 | - | Serum_circ_0699 | 5.00  | 510   | 510 | ZMYND8                      | CDS,Exon       |
| chr20 | 45874751 | 45891172 | - | Serum_circ_0700 | 2.86  | 16421 | 804 | ZMYND8                      | CDS,Exon       |
| chr20 | 45891031 | 45905539 | - | Serum_circ_0701 | 2.14  | 14508 | 623 | ZMYND8                      | CDS,Exon       |
| chr20 | 45920539 | 45923523 | - | Serum_circ_0702 | 6.43  | 2984  | 207 | ZMYND8                      | CDS,Exon,5'UTR |
| chr20 | 47722345 | 47722534 | - | Serum_circ_0703 | 2.86  | 189   | NA  | NA                          | Intergenic     |
| chr20 | 47752369 | 47770608 | - | Serum_circ_0704 | 1.43  | 18239 | 404 | STAU1                       | CDS,Exon,5'UTR |
| chr20 | 49232538 | 49236669 | - | Serum_circ_0705 | 1.43  | 4131  | 226 | FAM65C                      | CDS,Exon,3'UTR |
| chr20 | 55091990 | 55093353 | + | Serum_circ_0706 | 1.43  | 1363  | NA  | GCNT7                       | Antisense      |
| chr20 | 55551197 | 55551322 | + | Serum_circ_0707 | 5.72  | 125   | NA  | NA                          | Intergenic     |
| chr20 | 57014000 | 57016139 | + | Serum_circ_0708 | 15.73 | 2139  | 258 | VAPB                        | CDS,Exon,5'UTR |
| chr20 | 58426622 | 58436553 | + | Serum_circ_0709 | 1.43  | 9931  | NA  | NA                          | Intergenic     |
| chr20 | 58755107 | 58755971 | + | Serum_circ_0710 | 1.43  | 864   | NA  | MIR646HG                    | LncRNA         |
| chr20 | 60265057 | 60265203 | + | Serum_circ_0711 | 2.86  | 146   | NA  | CDH4<br>TCONS_00029<br>068  | Intron         |
| chr21 | 9827146  | 9827287  | - | Serum_circ_0712 | 2.14  | 141   | NA  | CDH4<br>TCONS_00029<br>068  | LncRNA         |
| chr21 | 9827155  | 9827307  | - | Serum_circ_0713 | 4.29  | 152   | NA  | CDH4<br>TCONS_00029<br>068  | LncRNA         |
| chr21 | 16363521 | 16415895 | - | Serum_circ_0714 | 12.87 | 52374 | 203 | NRIP1                       | Exon,5'UTR     |
| chr21 | 16386664 | 16387546 | - | Serum_circ_0715 | 1.43  | 882   | 123 | NRIP1                       | Exon,5'UTR     |
| chr21 | 16386664 | 16415895 | - | Serum_circ_0716 | 65.05 | 29231 | 203 | NRIP1                       | Exon,5'UTR     |
| chr21 | 17135209 | 17138460 | + | Serum_circ_0717 | 1.43  | 3251  | 223 | USP25                       | CDS,Exon       |
| chr21 | 17196357 | 17198684 | + | Serum_circ_0718 | 2.14  | 2327  | 386 | USP25                       | CDS,Exon       |
| chr21 | 30358459 | 30359255 | - | Serum_circ_0719 | 1.43  | 796   | 303 | LTN1                        | CDS,Exon       |
| chr21 | 30701807 | 30702014 | + | Serum_circ_0720 | 2.86  | 207   | 207 | BACH1                       | CDS,Exon,5'UTR |
| chr21 | 34066537 | 34067592 | - | Serum_circ_0721 | 2.14  | 1055  | 310 | SYNJ1                       | CDS,Exon       |
| chr21 | 36206706 | 36231875 | - | Serum_circ_0722 | 11.44 | 25169 | 297 | RUNX1                       | CDS,Exon       |
| chr21 | 37619814 | 37623582 | + | Serum_circ_0723 | 1.43  | 3768  | 424 | DOPEY2                      | CDS,Exon       |
| chr21 | 37711076 | 37717005 | + | Serum_circ_0724 | 10.01 | 5929  | 277 | MORC3                       | CDS,Exon       |
| chr21 | 37711148 | 37717329 | + | Serum_circ_0725 | 2.14  | 6181  | 397 | MORC3                       | CDS,Exon       |
| chr21 | 37734480 | 37736557 | + | Serum_circ_0726 | 4.29  | 2077  | 213 | MORC3                       | CDS,Exon       |
| chr21 | 38792600 | 38794168 | + | Serum_circ_0727 | 12.87 | 1568  | 171 | DYRK1A                      | CDS,Exon,5'UTR |
| chr21 | 38792600 | 38798083 | + | Serum_circ_0728 | 2.86  | 5483  | 171 | DYRK1A                      | CDS,Exon,5'UTR |
| chr21 | 38792600 | 38845182 | + | Serum_circ_0729 | 3.57  | 52582 | 368 | DYRK1A                      | CDS,Exon,5'UTR |
| chr21 | 40578033 | 40584633 | - | Serum_circ_0730 | 2.86  | 6600  | 506 | BRWD1                       | CDS,Exon       |
| chr21 | 40587162 | 40590586 | - | Serum_circ_0731 | 1.43  | 3424  | 403 | BRWD1<br>TCONS_00029<br>027 | CDS,Exon       |
| chr21 | 43195267 | 43195400 | + | Serum_circ_0732 | 4.29  | 133   | NA  | BRWD1<br>TCONS_00029<br>027 | LncRNA         |
| chr21 | 45497573 | 45500008 | + | Serum_circ_0733 | 2.14  | 2435  | 346 | TRAPPC10                    | CDS,Exon       |
| chr21 | 47768925 | 47769734 | + | Serum_circ_0734 | 5.00  | 809   | 312 | PCNT                        | CDS,Exon       |
| chr22 | 19712122 | 19712233 | + | Serum_circ_0735 | 2.14  | 111   | 111 | GP1BB                       | Exon,3'UTR     |
| chr22 | 21288066 | 21288532 | + | Serum_circ_0736 | 5.00  | 466   | 466 | CRKL                        | CDS,Exon       |
| chr22 | 24133942 | 24159123 | + | Serum_circ_0737 | 4.29  | 25181 | 814 | SMARCB1                     | CDS,Exon       |
| chr22 | 26057542 | 26063767 | + | Serum_circ_0738 | 6.43  | 6225  | 239 | ADRBK2                      | CDS,Exon       |
| chr22 | 26059596 | 26063767 | + | Serum_circ_0739 | 1.43  | 4171  | 137 | ADRBK2                      | CDS,Exon       |
| chr22 | 28943661 | 28946139 | - | Serum_circ_0740 | 2.86  | 2478  | NA  | TTC28                       | Intron         |
| chr22 | 35957769 | 35957878 | + | Serum_circ_0741 | 2.86  | 109   | NA  | NA                          | Intergenic     |
| chr22 | 41349558 | 41363888 | + | Serum_circ_0742 | 2.86  | 14330 | 236 | RBX1                        | CDS,Exon       |
| chr22 | 41531816 | 41536261 | + | Serum_circ_0743 | 1.43  | 4445  | 350 | EP300                       | CDS,Exon       |

|       |           |           |   |                 |       |       |      |          |                |
|-------|-----------|-----------|---|-----------------|-------|-------|------|----------|----------------|
| chr22 | 42204878  | 42206295  | + | Serum_circ_0744 | 1.43  | 1417  | 326  | CCDC134  | CDS,Exon,5'UTR |
| chr22 | 42294652  | 42296502  | + | Serum_circ_0745 | 2.86  | 1850  | 722  | SREBF2   | CDS,Exon,5'UTR |
| chr22 | 46125304  | 46136418  | + | Serum_circ_0746 | 2.86  | 11114 | 445  | ATXN10   | CDS,Exon       |
| chr22 | 47115982  | 47116912  | - | Serum_circ_0747 | 4.29  | 930   | 237  | CERK     | CDS,Exon       |
| chr22 | 47370185  | 47374830  | + | Serum_circ_0748 | 2.86  | 4645  | 110  | TBC1D22A | CDS,Exon       |
| chr22 | 47370185  | 47393605  | + | Serum_circ_0749 | 1.43  | 23420 | 186  | TBC1D22A | CDS,Exon,5'UTR |
| chr22 | 50810448  | 50832564  | + | Serum_circ_0750 | 2.14  | 22116 | 374  | PPP6R2   | CDS,Exon,5'UTR |
| chr3  | 9495422   | 9506356   | + | Serum_circ_0751 | 1.43  | 10934 | 378  | SETD5    | CDS,Exon       |
| chr3  | 15071781  | 15076316  | + | Serum_circ_0752 | 1.43  | 4535  | 440  | NR2C2    | CDS,Exon       |
| chr3  | 20178433  | 20181856  | + | Serum_circ_0753 | 2.86  | 3423  | 255  | KAT2B    | CDS,Exon       |
| chr3  | 27490141  | 27493989  | - | Serum_circ_0754 | 1.43  | 3848  | 229  | SLC4A7   | CDS,Exon       |
| chr3  | 31617887  | 31621588  | + | Serum_circ_0755 | 1.43  | 3701  | 397  | STT3B    | CDS,Exon       |
| chr3  | 31617887  | 31641951  | + | Serum_circ_0756 | 5.72  | 24064 | 563  | STT3B    | CDS,Exon       |
| chr3  | 32745359  | 32758729  | + | Serum_circ_0757 | 2.86  | 13370 | 722  | CNOT10   | CDS,Exon,5'UTR |
| chr3  | 33944989  | 33945160  | + | Serum_circ_0758 | 1.43  | 171   | NA   | NA       | Intergenic     |
| chr3  | 37170553  | 37190529  | - | Serum_circ_0759 | 1.43  | 19976 | 232  | LRRFIP2  | CDS,Exon,5'UTR |
| chr3  | 37315026  | 37323763  | + | Serum_circ_0760 | 5.00  | 8737  | 381  | GOLGA4   | CDS,Exon       |
| chr3  | 41860914  | 41877463  | - | Serum_circ_0761 | 2.14  | 16549 | 192  | ULK4     | CDS,Exon       |
| chr3  | 47139444  | 47147610  | - | Serum_circ_0762 | 4.29  | 8166  | 427  | SETD2    | CDS,Exon       |
| chr3  | 47466974  | 47470160  | - | Serum_circ_0763 | 1.43  | 3186  | 785  | SCAP     | CDS,Exon       |
| chr3  | 49372452  | 49373029  | - | Serum_circ_0764 | 11.44 | 577   | 128  | USP4     | CDS,Exon       |
| chr3  | 50142509  | 50143142  | + | Serum_circ_0765 | 2.86  | 633   | 227  | RBM5     | CDS,Exon,5'UTR |
| chr3  | 50145502  | 50145737  | + | Serum_circ_0766 | 10.72 | 235   | 151  | RBM5     | CDS,Exon,5'UTR |
| chr3  | 52446826  | 52448603  | + | Serum_circ_0767 | 10.72 | 1777  | 255  | PHF7     | CDS,Exon,5'UTR |
| chr3  | 52771601  | 52775515  | - | Serum_circ_0768 | 5.72  | 3914  | 429  | NEK4     | CDS,Exon       |
| chr3  | 55640807  | 55733540  | - | Serum_circ_0769 | 1.43  | 92733 | 2456 | ERC2     | CDS,Exon,3'UTR |
| chr3  | 56599665  | 56601081  | + | Serum_circ_0770 | 2.86  | 1416  | 417  | CCDC66   | CDS,Exon,5'UTR |
| chr3  | 56600621  | 56601081  | + | Serum_circ_0771 | 6.43  | 460   | 417  | CCDC66   | CDS,Exon,5'UTR |
| chr3  | 56626997  | 56628056  | + | Serum_circ_0772 | 2.86  | 1059  | 468  | CCDC66   | CDS,Exon,5'UTR |
| chr3  | 56703727  | 56705720  | - | Serum_circ_0773 | 2.14  | 1993  | 258  | FAM208A  | CDS,Exon       |
| chr3  | 57276883  | 57282379  | + | Serum_circ_0774 | 2.14  | 5496  | 448  | APPL1    | CDS,Exon       |
| chr3  | 66293626  | 66313803  | + | Serum_circ_0775 | 2.86  | 20177 | 263  | SLC25A26 | CDS,Exon,5'UTR |
| chr3  | 69265413  | 69273841  | - | Serum_circ_0776 | 10.01 | 8428  | 295  | FRMD4B   | CDS,Exon       |
| chr3  | 71026091  | 71027180  | - | Serum_circ_0777 | 1.43  | 1089  | 461  | FOXP1    | CDS,Exon       |
| chr3  | 71056966  | 71057157  | - | Serum_circ_0778 | 3.57  | 191   | NA   | FOXP1    | Intron         |
| chr3  | 71090478  | 71102924  | - | Serum_circ_0779 | 3.57  | 12446 | 587  | FOXP1    | CDS,Exon,5'UTR |
| chr3  | 71739160  | 71759635  | - | Serum_circ_0780 | 1.43  | 20475 | 452  | EIF4E3   | CDS,Exon,5'UTR |
| chr3  | 107429298 | 107435696 | + | Serum_circ_0781 | 1.43  | 6398  | 414  | BBX      | CDS,Exon,5'UTR |
| chr3  | 108773574 | 108780905 | - | Serum_circ_0782 | 2.14  | 7331  | 435  | MORC1    | CDS,Exon       |
| chr3  | 108773574 | 108788604 | - | Serum_circ_0783 | 4.29  | 15030 | 641  | MORC1    | CDS,Exon       |
| chr3  | 119582265 | 119595355 | - | Serum_circ_0784 | 1.43  | 13090 | 322  | GSK3B    | CDS,Exon       |
| chr3  | 119582265 | 119624699 | - | Serum_circ_0785 | 1.43  | 42434 | 420  | GSK3B    | CDS,Exon       |
| chr3  | 120351993 | 120357428 | - | Serum_circ_0786 | 3.57  | 5435  | 309  | HGD      | CDS,Exon       |
| chr3  | 122892840 | 122892964 | + | Serum_circ_0787 | 2.14  | 124   | NA   | NA       | Intergenic     |
| chr3  | 128514202 | 128516912 | + | Serum_circ_0788 | 8.58  | 2710  | 188  | RAB7A    | CDS,Exon,5'UTR |
| chr3  | 128973510 | 128973920 | + | Serum_circ_0789 | 2.14  | 410   | 169  | COPG1    | CDS,Exon       |
| chr3  | 130711794 | 130720158 | + | Serum_circ_0790 | 3.57  | 8364  | 885  | ATP2C1   | CDS,Exon       |
| chr3  | 132211230 | 132215507 | + | Serum_circ_0791 | 2.14  | 4277  | 533  | DNAJC13  | CDS,Exon       |
| chr3  | 136323150 | 136349823 | - | Serum_circ_0792 | 2.14  | 26673 | 380  | STAG1    | CDS,Exon,5'UTR |
| chr3  | 138289159 | 138291774 | - | Serum_circ_0793 | 2.86  | 2615  | 526  | CEP70    | CDS,Exon,5'UTR |

|      |           |           |   |                 |       |       |      |          |                 |
|------|-----------|-----------|---|-----------------|-------|-------|------|----------|-----------------|
| chr3 | 138400808 | 138403645 | - | Serum_circ_0794 | 1.43  | 2837  | 368  | PIK3CB   | CDS,Exon        |
| chr3 | 142074242 | 142090170 | - | Serum_circ_0795 | 1.43  | 15928 | 790  | XRN1     | CDS,Exon        |
| chr3 | 143513842 | 143551063 | - | Serum_circ_0796 | 5.00  | 37221 | 358  | SLC9A9   | CDS,Exon        |
| chr3 | 150834124 | 150840761 | + | Serum_circ_0797 | 1.43  | 6637  | 297  | MED12L   | CDS,Exon        |
| chr3 | 150834124 | 150845771 | + | Serum_circ_0798 | 2.14  | 11647 | 457  | MED12L   | CDS,Exon        |
| chr3 | 155493489 | 155520380 | - | Serum_circ_0799 | 1.43  | 26891 | 208  | C3orf33  | CDS,Exon,5'UTR  |
| chr3 | 157839891 | 157841780 | + | Serum_circ_0800 | 12.87 | 1889  | 322  | RSRC1    | CDS,Exon,5'UTR  |
| chr3 | 157989571 | 157989993 | + | Serum_circ_0801 | 5.00  | 422   | NA   | RSRC1    | Intron          |
| chr3 | 169840378 | 169843795 | - | Serum_circ_0802 | 2.14  | 3417  | 154  | PHC3     | CDS,Exon        |
| chr3 | 169840378 | 169854453 | - | Serum_circ_0803 | 2.86  | 14075 | 1270 | PHC3     | CDS,Exon        |
| chr3 | 169854206 | 169863309 | - | Serum_circ_0804 | 1.43  | 9103  | 346  | PHC3     | CDS,Exon        |
| chr3 | 169854206 | 169867032 | - | Serum_circ_0805 | 12.15 | 12826 | 505  | PHC3     | CDS,Exon        |
| chr3 | 169863210 | 169867032 | - | Serum_circ_0806 | 5.72  | 3822  | 258  | PHC3     | CDS,Exon        |
| chr3 | 170855979 | 170858298 | - | Serum_circ_0807 | 5.72  | 2319  | 387  | TNIK     | CDS,Exon        |
| chr3 | 171965322 | 171969331 | + | Serum_circ_0808 | 22.16 | 4009  | 526  | FNDC3B   | CDS,Exon        |
| chr3 | 179131199 | 179137293 | - | Serum_circ_0809 | 1.43  | 6094  | 603  | GNB4     | CDS,Exon        |
| chr3 | 182751778 | 182755222 | - | Serum_circ_0810 | 2.14  | 3444  | 304  | MCCC1    | CDS,Exon        |
| chr3 | 182788786 | 182789145 | - | Serum_circ_0811 | 5.00  | 359   | 270  | MCCC1    | CDS,Exon        |
| chr3 | 183097084 | 183107567 | - | Serum_circ_0812 | 2.14  | 10483 | 199  | MCF2L2   | CDS,Exon        |
| chr3 | 185251358 | 185252920 | - | Serum_circ_0813 | 3.57  | 1562  | 477  | LIPH     | CDS,Exon        |
| chr3 | 185318552 | 185331196 | + | Serum_circ_0814 | 1.43  | 12644 | 575  | SEN2     | CDS,Exon        |
| chr3 | 185638891 | 185639914 | - | Serum_circ_0815 | 2.14  | 1023  | 200  | TRA2B    | CDS,Exon        |
| chr3 | 194169185 | 194175121 | - | Serum_circ_0816 | 1.43  | 5936  | 520  | ATP13A3  | CDS,Exon        |
| chr3 | 195063199 | 195066046 | - | Serum_circ_0817 | 2.14  | 2847  | 243  | ACAP2    | CDS,Exon        |
| chr3 | 195968818 | 195969511 | - | Serum_circ_0818 | 7.15  | 693   | 222  | PCYT1A   | CDS,Exon        |
| chr3 | 195968818 | 195975194 | - | Serum_circ_0819 | 2.14  | 6376  | 491  | PCYT1A   | CDS,Exon        |
| chr3 | 196118683 | 196120490 | - | Serum_circ_0820 | 4.29  | 1807  | 179  | UBXN7    | CDS,Exon        |
| chr3 | 196118683 | 196129890 | - | Serum_circ_0821 | 20.01 | 11207 | 247  | UBXN7    | CDS,Exon        |
| chr3 | 196118683 | 196134264 | - | Serum_circ_0822 | 2.14  | 15581 | 395  | UBXN7    | CDS,Exon        |
| chr3 | 197541778 | 197547301 | + | Serum_circ_0823 | 8.58  | 5523  | 378  | LRCH3    | CDS,Exon        |
| chr3 | 197597030 | 197602646 | + | Serum_circ_0824 | 9.29  | 5616  | NA   | NA       | Exon,CDS,Intron |
| chr4 | 2338411   | 2338708   | + | Serum_circ_0825 | 11.44 | 297   | NA   | ZFYVE28  | Antisense       |
| chr4 | 3005957   | 3009555   | + | Serum_circ_0826 | 2.14  | 3598  | 197  | GRK4     | CDS,Exon        |
| chr4 | 6843793   | 6860233   | + | Serum_circ_0827 | 1.43  | 16440 | 287  | KIAA0232 | CDS,Exon        |
| chr4 | 6995910   | 7002978   | + | Serum_circ_0828 | 3.57  | 7068  | 427  | TBC1D14  | CDS,Exon,5'UTR  |
| chr4 | 9828043   | 9836632   | - | Serum_circ_0829 | 3.57  | 8589  | 128  | SLC2A9   | CDS,Exon        |
| chr4 | 26387974  | 26407892  | + | Serum_circ_0830 | 2.86  | 19918 | 135  | RBPJ     | CDS,Exon        |
| chr4 | 37633006  | 37640126  | - | Serum_circ_0831 | 1.43  | 7120  | 434  | RELL1    | CDS,Exon,3'UTR  |
| chr4 | 38091552  | 38104778  | + | Serum_circ_0832 | 2.14  | 13226 | 507  | TBC1D1   | CDS,Exon        |
| chr4 | 39328182  | 39329376  | - | Serum_circ_0833 | 10.01 | 1194  | 311  | RFC1     | CDS,Exon        |
| chr4 | 39739039  | 39779430  | + | Serum_circ_0834 | 3.57  | 40391 | 465  | UBE2K    | CDS,Exon        |
| chr4 | 42466706  | 42467093  | - | Serum_circ_0835 | 4.29  | 387   | 295  | ATP8A1   | CDS,Exon        |
| chr4 | 42505466  | 42517127  | - | Serum_circ_0836 | 3.57  | 11661 | 204  | ATP8A1   | CDS,Exon        |
| chr4 | 42618049  | 42629126  | - | Serum_circ_0837 | 6.43  | 11077 | 360  | ATP8A1   | CDS,Exon        |
| chr4 | 48158696  | 48200275  | - | Serum_circ_0838 | 1.43  | 41579 | 654  | TEC      | CDS,Exon        |
| chr4 | 48371865  | 48385801  | + | Serum_circ_0839 | 5.72  | 13936 | 971  | SLAIN2   | CDS,Exon        |
| chr4 | 52729602  | 52752804  | + | Serum_circ_0840 | 2.14  | 23202 | 389  | DCUN1D4  | CDS,Exon,5'UTR  |
| chr4 | 54011499  | 54011749  | - | Serum_circ_0841 | 1.43  | 250   | 250  | SCFD2    | CDS,Exon        |
| chr4 | 54265896  | 54294350  | + | Serum_circ_0842 | 1.43  | 28454 | 469  | FIP1L1   | CDS,Exon        |
| chr4 | 54280781  | 54294350  | + | Serum_circ_0843 | 12.87 | 13569 | 359  | FIP1L1   | CDS,Exon        |



|      |           |           |   |                 |       |       |      |                |                       |
|------|-----------|-----------|---|-----------------|-------|-------|------|----------------|-----------------------|
| chr4 | 54292038  | 54294350  | + | Serum_circ_0844 | 7.86  | 2312  | 251  | FIP1L1         | CDS,Exon              |
| chr4 | 56265252  | 56290810  | + | Serum_circ_0845 | 1.43  | 25558 | 794  | TMEM165        | CDS,Exon,5'UTR        |
| chr4 | 56277780  | 56284152  | + | Serum_circ_0846 | 10.72 | 6372  | 585  | TMEM165        | CDS,Exon,5'UTR        |
| chr4 | 57150974  | 57164515  | + | Serum_circ_0847 | 2.14  | 13541 | 136  | KIAA1211       | CDS,Exon,5'UTR        |
| chr4 | 73950965  | 73958017  | - | Serum_circ_0848 | 2.86  | 7052  | 1832 | ANKRD17        | CDS,Exon              |
| chr4 | 76711302  | 76711950  | + | Serum_circ_0849 | 3.57  | 648   | 244  | USO1           | CDS,Exon              |
| chr4 | 79747190  | 79772210  | + | Serum_circ_0850 | 1.43  | 25020 | 705  | BMP2K          | CDS,Exon              |
| chr4 | 83799882  | 83803090  | - | Serum_circ_0851 | 5.00  | 3208  | 403  | SEC31A         | CDS,Exon,5'UTR        |
| chr4 | 83867410  | 83900159  | - | Serum_circ_0852 | 1.43  | 32749 | 623  | LIN54          | CDS,Exon,3'UTR        |
| chr4 | 83966778  | 83971137  | + | Serum_circ_0853 | 2.14  | 4359  | 336  | COPS4          | CDS,Exon              |
| chr4 | 87967317  | 87968746  | + | Serum_circ_0854 | 2.86  | 1429  | 1021 | AFF1           | CDS,Exon              |
| chr4 | 88116475  | 88116842  | - | Serum_circ_0855 | 23.59 | 367   | 367  | KLHL8          | CDS,Exon,5'UTR        |
| chr4 | 90856599  | 90856956  | + | Serum_circ_0856 | 2.14  | 357   | 357  | MMRN1          | CDS,Exon              |
| chr4 | 95155104  | 95162157  | + | Serum_circ_0857 | 2.86  | 7053  | 337  | SMARCAD1       | CDS,Exon,5'UTR        |
| chr4 | 95405145  | 95445026  | + | Serum_circ_0858 | 2.14  | 39881 | 152  | PDLIM5         | CDS,Exon,5'UTR        |
| chr4 | 96113327  | 96113433  | - | Serum_circ_0859 | 2.14  | 106   | NA   | UNC5C          | Intron                |
| chr4 | 103432036 | 103459113 | + | Serum_circ_0860 | 2.86  | 27077 | 303  | NFKB1          | CDS,Exon,5'UTR        |
| chr4 | 105439733 | 105440611 | - | Serum_circ_0861 | 5.00  | 878   | NA   | NA             | Intergenic            |
| chr4 | 106317405 | 106359193 | - | Serum_circ_0862 | 4.29  | 41788 | 428  | PPA2           | CDS,Exon              |
| chr4 | 107114765 | 107133992 | - | Serum_circ_0863 | 1.43  | 19227 | 285  | TBCK           | CDS,Exon              |
| chr4 | 110384056 | 110384800 | + | Serum_circ_0864 | 1.43  | 744   | 744  | SEC24B         | CDS,Exon              |
| chr4 | 110862101 | 110866431 | + | Serum_circ_0865 | 7.15  | 4330  | 813  | EGF            | CDS,Exon              |
| chr4 | 110866228 | 110866431 | + | Serum_circ_0866 | 3.57  | 203   | 203  | EGF            | CDS,Exon              |
| chr4 | 110914402 | 110921002 | + | Serum_circ_0867 | 2.86  | 6600  | 439  | EGF            | CDS,Exon              |
| chr4 | 119026172 | 119064839 | + | Serum_circ_0868 | 8.58  | 38667 | 558  | NDST3          | CDS,Exon              |
| chr4 | 120440199 | 120481518 | - | Serum_circ_0869 | 8.58  | 41319 | 869  | PDE5A          | CDS,Exon              |
| chr4 | 120473704 | 120488299 | - | Serum_circ_0870 | 1.43  | 14595 | 565  | PDE5A          | CDS,Exon              |
| chr4 | 123107190 | 123111234 | + | Serum_circ_0871 | 1.43  | 4044  | 543  | KIAA1109       | CDS,Exon              |
| chr4 | 125422050 | 125464865 | - | Serum_circ_0872 | 2.14  | 42815 | NA   | TCONS_00007433 | LncRNA                |
| chr4 | 128851837 | 128863313 | - | Serum_circ_0873 | 2.14  | 11476 | 559  | MFSD8          | CDS,Exon              |
| chr4 | 129857809 | 129880932 | - | Serum_circ_0874 | 4.29  | 23123 | 960  | SCLT1          | CDS,Exon              |
| chr4 | 129913321 | 129925031 | - | Serum_circ_0875 | 21.44 | 11710 | 396  | SCLT1          | CDS,Exon              |
| chr4 | 140037802 | 140060651 | - | Serum_circ_0876 | 2.86  | 22849 | NA   | NA             | Exon,CDS,5'UTR,Intron |
| chr4 | 140058783 | 140060651 | - | Serum_circ_0877 | 4.29  | 1868  | 323  | ELF2           | CDS,Exon,5'UTR        |
| chr4 | 140810510 | 140812121 | - | Serum_circ_0878 | 1.43  | 1611  | 1599 | MAML3          | CDS,Exon              |
| chr4 | 143181644 | 143191927 | - | Serum_circ_0879 | 2.86  | 10283 | 185  | INPP4B         | CDS,Exon              |
| chr4 | 144464661 | 144465125 | + | Serum_circ_0880 | 94.35 | 464   | 269  | SMARCA5        | CDS,Exon              |
| chr4 | 148743877 | 148744108 | + | Serum_circ_0881 | 2.14  | 231   | 158  | ARHGAP10       | CDS,Exon              |
| chr4 | 148775826 | 148800489 | + | Serum_circ_0882 | 2.86  | 24663 | 555  | ARHGAP10       | CDS,Exon              |
| chr4 | 148775826 | 148803083 | + | Serum_circ_0883 | 4.29  | 27257 | 650  | ARHGAP10       | CDS,Exon              |
| chr4 | 148778703 | 148803083 | + | Serum_circ_0884 | 1.43  | 24380 | 650  | ARHGAP10       | CDS,Exon              |
| chr4 | 148785996 | 148803083 | + | Serum_circ_0885 | 2.86  | 17087 | 548  | ARHGAP10       | CDS,Exon              |
| chr4 | 148860975 | 148887990 | + | Serum_circ_0886 | 2.14  | 27015 | 488  | ARHGAP10       | CDS,Exon              |
| chr4 | 151023629 | 151023964 | + | Serum_circ_0887 | 7.86  | 335   | 335  | DCLK2          | CDS,Exon,5'UTR        |
| chr4 | 151656409 | 151729550 | - | Serum_circ_0888 | 1.43  | 73141 | 449  | LRBA           | CDS,Exon              |
| chr4 | 151682934 | 151729550 | - | Serum_circ_0889 | 4.29  | 46616 | 340  | LRBA           | CDS,Exon              |
| chr4 | 151727422 | 151738409 | - | Serum_circ_0890 | 4.29  | 10987 | 347  | LRBA           | CDS,Exon              |
| chr4 | 153332454 | 153333681 | - | Serum_circ_0891 | 1.43  | 1227  | 620  | FBXW7          | CDS,Exon,5'UTR        |
| chr4 | 154547298 | 154553990 | + | Serum_circ_0892 | 4.29  | 6692  | 283  | KIAA0922       | CDS,Exon              |
| chr4 | 156696119 | 156698794 | + | Serum_circ_0893 | 12.87 | 2675  | 220  | GUCY1B3        | CDS,Exon              |

|      |           |           |   |                 |       |       |     |                |                |
|------|-----------|-----------|---|-----------------|-------|-------|-----|----------------|----------------|
| chr4 | 160159960 | 160162520 | + | Serum_circ_0894 | 3.57  | 2560  | NA  | NA             | Intergenic     |
| chr4 | 170398274 | 170400685 | - | Serum_circ_0895 | 7.15  | 2411  | 427 | NEK1           | CDS,Exon       |
| chr4 | 170458959 | 170477246 | - | Serum_circ_0896 | 2.14  | 18287 | 399 | NEK1           | CDS,Exon       |
| chr4 | 170523158 | 170523829 | - | Serum_circ_0897 | 2.14  | 671   | 262 | NEK1           | CDS,Exon,5'UTR |
| chr4 | 177632652 | 177650900 | - | Serum_circ_0898 | 1.43  | 18248 | 557 | VEGFC          | CDS,Exon       |
| chr4 | 178274461 | 178274882 | + | Serum_circ_0899 | 5.00  | 421   | 421 | NEIL3          | CDS,Exon       |
| chr5 | 6623326   | 6625782   | - | Serum_circ_0900 | 4.29  | 2456  | 178 | NSUN2          | CDS,Exon,3'UTR |
| chr5 | 31175280  | 31192193  | - | Serum_circ_0901 | 3.57  | 16913 | NA  | NA             | Intergenic     |
| chr5 | 32248107  | 32248984  | - | Serum_circ_0902 | 1.43  | 877   | 232 | MTMR12         | CDS,Exon       |
| chr5 | 37238958  | 37239971  | - | Serum_circ_0903 | 3.57  | 1013  | 261 | C5orf42        | CDS,Exon       |
| chr5 | 38971978  | 38978752  | - | Serum_circ_0904 | 6.43  | 6774  | 285 | RICTOR         | CDS,Exon,5'UTR |
| chr5 | 38991050  | 39003724  | - | Serum_circ_0905 | 7.15  | 12674 | 388 | RICTOR         | CDS,Exon,5'UTR |
| chr5 | 42277838  | 42277977  | - | Serum_circ_0906 | 2.14  | 139   | NA  | NA             | Intergenic     |
| chr5 | 43675612  | 43677908  | + | Serum_circ_0907 | 9.29  | 2296  | 242 | NNT            | CDS,Exon       |
| chr5 | 43675612  | 43704502  | + | Serum_circ_0908 | 6.43  | 28890 | 477 | NNT            | CDS,Exon       |
| chr5 | 54941616  | 54960691  | - | Serum_circ_0909 | 2.86  | 19075 | 641 | SLC38A9        | CDS,Exon,3'UTR |
| chr5 | 56160560  | 56161804  | + | Serum_circ_0910 | 6.43  | 1244  | 467 | MAP3K1         | CDS,Exon       |
| chr5 | 61669513  | 61677080  | + | Serum_circ_0911 | 1.43  | 7567  | 389 | KIF2A          | CDS,Exon       |
| chr5 | 61689781  | 61690434  | - | Serum_circ_0912 | 2.14  | 653   | 217 | DIMT1          | CDS,Exon       |
| chr5 | 65271814  | 65290692  | + | Serum_circ_0913 | 2.14  | 18878 | 364 | ERBB2IP        | CDS,Exon,5'UTR |
| chr5 | 65284462  | 65290692  | + | Serum_circ_0914 | 3.57  | 6230  | 364 | ERBB2IP        | CDS,Exon,5'UTR |
| chr5 | 65381274  | 65384991  | + | Serum_circ_0915 | 2.14  | 3717  | NA  | NA             | Intergenic     |
| chr5 | 68470703  | 68471364  | + | Serum_circ_0916 | 4.29  | 661   | 378 | CCNB1          | CDS,Exon       |
| chr5 | 70757643  | 70759944  | + | Serum_circ_0917 | 2.14  | 2301  | 170 | BDP1           | CDS,Exon       |
| chr5 | 72370568  | 72373320  | + | Serum_circ_0918 | 7.15  | 2752  | 268 | FCHO2          | CDS,Exon       |
| chr5 | 74842834  | 74848416  | + | Serum_circ_0919 | 4.29  | 5582  | 268 | POLK           | CDS,Exon,5'UTR |
| chr5 | 75757394  | 75758139  | + | Serum_circ_0920 | 5.72  | 745   | 100 | IQGAP2         | CDS,Exon       |
| chr5 | 75866404  | 75871594  | + | Serum_circ_0921 | 1.43  | 5190  | 155 | IQGAP2         | CDS,Exon       |
| chr5 | 78952780  | 78964851  | + | Serum_circ_0922 | 1.43  | 12071 | 181 | PAPD4          | CDS,Exon       |
| chr5 | 86578185  | 86595665  | + | Serum_circ_0923 | 2.14  | 17480 | NA  | RASA1          | Intron         |
| chr5 | 86679529  | 86682720  | + | Serum_circ_0924 | 2.86  | 3191  | 235 | RASA1          | CDS,Exon       |
| chr5 | 88100414  | 88119747  | - | Serum_circ_0925 | 2.86  | 19333 | 593 | MEF2C          | CDS,Exon,5'UTR |
| chr5 | 94872520  | 94886354  | - | Serum_circ_0926 | 7.15  | 13834 | 978 | TTC37          | CDS,Exon,5'UTR |
| chr5 | 95091099  | 95099324  | + | Serum_circ_0927 | 20.73 | 8225  | 479 | RHOBTB3        | CDS,Exon       |
| chr5 | 109049220 | 109051965 | + | Serum_circ_0928 | 2.86  | 2745  | 400 | MAN2A1         | CDS,Exon       |
| chr5 | 109049220 | 109065214 | + | Serum_circ_0929 | 2.14  | 15994 | 572 | MAN2A1         | CDS,Exon       |
| chr5 | 109117096 | 109125228 | + | Serum_circ_0930 | 2.86  | 8132  | 569 | MAN2A1         | CDS,Exon       |
| chr5 | 112868575 | 112871495 | + | Serum_circ_0931 | 2.86  | 2920  | 427 | YTHDC2         | CDS,Exon       |
| chr5 | 122137563 | 122139308 | + | Serum_circ_0932 | 3.57  | 1745  | 253 | SNX2           | CDS,Exon       |
| chr5 | 122272428 | 122281854 | + | Serum_circ_0933 | 2.86  | 9426  | 189 | SNX24          | CDS,Exon       |
| chr5 | 122881110 | 122893258 | + | Serum_circ_0934 | 12.87 | 12148 | 536 | CSNK1G3        | CDS,Exon,5'UTR |
| chr5 | 131013395 | 131044965 | - | Serum_circ_0935 | 6.43  | 31570 | 813 | FNIP1          | CDS,Exon       |
| chr5 | 133871547 | 133887899 | + | Serum_circ_0936 | 2.86  | 16352 | 311 | JADE2          | CDS,Exon       |
| chr5 | 137320945 | 137324004 | - | Serum_circ_0937 | 15.01 | 3059  | 331 | FAM13B         | CDS,Exon       |
| chr5 | 139819703 | 139828890 | + | Serum_circ_0938 | 2.86  | 9187  | 625 | ANKHD1         | CDS,Exon       |
| chr5 | 140960310 | 140963182 | - | Serum_circ_0939 | 1.43  | 2872  | 422 | DIAPH1         | CDS,Exon       |
| chr5 | 144817634 | 144869887 | - | Serum_circ_0940 | 4.29  | 52253 | NA  | NA             | Intergenic     |
| chr5 | 144832476 | 144852878 | - | Serum_circ_0941 | 1.43  | 20402 | NA  | TCONS_00009797 | LncRNA         |
| chr5 | 150102468 | 150110718 | - | Serum_circ_0942 | 1.43  | 8250  | 297 | DCTN4          | CDS,Exon       |
| chr5 | 153409048 | 153414527 | - | Serum_circ_0943 | 6.43  | 5479  | 509 | FAM114A2       | CDS,Exon,5'UTR |

|      |           |           |   |                 |       |       |      |          |                |
|------|-----------|-----------|---|-----------------|-------|-------|------|----------|----------------|
| chr5 | 153413350 | 153414527 | - | Serum_circ_0944 | 1.43  | 1177  | 417  | FAM114A2 | CDS,Exon,5'UTR |
| chr5 | 156721791 | 156727904 | + | Serum_circ_0945 | 1.43  | 6113  | 362  | CYFIP2   | CDS,Exon       |
| chr5 | 174919097 | 174919270 | + | Serum_circ_0946 | 2.14  | 173   | 173  | SFXN1    | CDS,Exon,5'UTR |
| chr5 | 176370335 | 176385155 | - | Serum_circ_0947 | 20.73 | 14820 | 397  | UIMC1    | CDS,Exon       |
| chr5 | 176409469 | 176409624 | - | Serum_circ_0948 | 4.29  | 155   | 155  | UIMC1    | CDS,Exon,5'UTR |
| chr5 | 176709465 | 176710929 | + | Serum_circ_0949 | 4.29  | 1464  | 259  | NSD1     | CDS,Exon       |
| chr5 | 179007947 | 179020646 | + | Serum_circ_0950 | 1.43  | 12699 | 523  | RUFY1    | CDS,Exon       |
| chr5 | 179132679 | 179133332 | + | Serum_circ_0951 | 2.14  | 653   | 248  | CANX     | CDS,Exon,5'UTR |
| chr5 | 179195850 | 179198244 | + | Serum_circ_0952 | 2.86  | 2394  | 337  | MAML1    | CDS,Exon       |
| chr6 | 6362415   | 6438965   | - | Serum_circ_0953 | 7.15  | 76550 | 566  | LY86-AS1 | Exon,3'UTR     |
| chr6 | 10702601  | 10702872  | + | Serum_circ_0954 | 2.14  | 271   | 196  | PAK1IP1  | CDS,Exon       |
| chr6 | 13579682  | 13584457  | + | Serum_circ_0955 | 6.43  | 4775  | 309  | SIRT5    | CDS,Exon,5'UTR |
| chr6 | 13632601  | 13644961  | - | Serum_circ_0956 | 6.43  | 12360 | 1020 | RANBP9   | CDS,Exon       |
| chr6 | 13639794  | 13644961  | - | Serum_circ_0957 | 1.43  | 5167  | 598  | RANBP9   | CDS,Exon       |
| chr6 | 13685360  | 13697128  | - | Serum_circ_0958 | 2.14  | 11768 | 112  | RANBP9   | CDS,Exon       |
| chr6 | 16245177  | 16254966  | + | Serum_circ_0959 | 2.86  | 9789  | 378  | GMPR     | CDS,Exon       |
| chr6 | 16586010  | 16658132  | - | Serum_circ_0960 | 1.43  | 72122 | 254  | ATXN1    | Exon,5'UTR     |
| chr6 | 17665469  | 17669777  | - | Serum_circ_0961 | 4.29  | 4308  | 363  | NUP153   | CDS,Exon       |
| chr6 | 17675135  | 17676001  | - | Serum_circ_0962 | 7.86  | 866   | 518  | NUP153   | CDS,Exon       |
| chr6 | 17773708  | 17777585  | - | Serum_circ_0963 | 3.57  | 3877  | 232  | KIF13A   | CDS,Exon       |
| chr6 | 20781375  | 20846409  | + | Serum_circ_0964 | 5.00  | 65034 | 225  | CDKAL1   | CDS,Exon       |
| chr6 | 29643162  | 29643836  | - | Serum_circ_0965 | 10.72 | 674   | 229  | ZFP57    | CDS,Exon       |
| chr6 | 36567597  | 36568053  | + | Serum_circ_0966 | 2.14  | 456   | 456  | SRSF3    | Exon,5'UTR     |
| chr6 | 37973713  | 38029551  | + | Serum_circ_0967 | 1.43  | 55838 | 183  | ZFAND3   | CDS,Exon       |
| chr6 | 41783820  | 41859613  | - | Serum_circ_0968 | 2.14  | 75793 | 156  | USP49    | Exon,5'UTR     |
| chr6 | 42571325  | 42574389  | + | Serum_circ_0969 | 2.86  | 3064  | 333  | UBR2     | CDS,Exon       |
| chr6 | 42650792  | 42652609  | + | Serum_circ_0970 | 1.43  | 1817  | 135  | UBR2     | CDS,Exon       |
| chr6 | 42902212  | 42903408  | + | Serum_circ_0971 | 2.86  | 1196  | 221  | CNPY3    | CDS,Exon       |
| chr6 | 47563596  | 47574013  | + | Serum_circ_0972 | 1.43  | 10417 | 422  | CD2AP    | CDS,Exon       |
| chr6 | 57046829  | 57048709  | + | Serum_circ_0973 | 3.57  | 1880  | 110  | BAG2     | CDS,Exon       |
| chr6 | 72002995  | 72006520  | + | Serum_circ_0974 | 3.57  | 3525  | 458  | OGFRL1   | CDS,Exon       |
| chr6 | 74345104  | 74346430  | - | Serum_circ_0975 | 2.14  | 1326  | 206  | SLC17A5  | CDS,Exon       |
| chr6 | 74432973  | 74446231  | + | Serum_circ_0976 | 10.72 | 13258 | 386  | CD109    | CDS,Exon       |
| chr6 | 76344422  | 76373234  | + | Serum_circ_0977 | 11.44 | 28812 | 641  | SENP6    | CDS,Exon       |
| chr6 | 76412360  | 76412788  | + | Serum_circ_0978 | 4.29  | 428   | 428  | SENP6    | CDS,Exon       |
| chr6 | 77969383  | 77983024  | - | Serum_circ_0979 | 3.57  | 13641 | NA   | NA       | Intergenic     |
| chr6 | 79752559  | 79770535  | - | Serum_circ_0980 | 2.86  | 17976 | 411  | PHIP     | CDS,Exon       |
| chr6 | 82923943  | 82924546  | - | Serum_circ_0981 | 2.14  | 603   | 603  | IBTK     | CDS,Exon       |
| chr6 | 84627723  | 84634311  | + | Serum_circ_0982 | 1.43  | 6588  | 369  | CYB5R4   | CDS,Exon       |
| chr6 | 87920168  | 87928449  | + | Serum_circ_0983 | 5.00  | 8281  | 370  | ZNF292   | CDS,Exon       |
| chr6 | 87925620  | 87928449  | + | Serum_circ_0984 | 5.72  | 2829  | 370  | ZNF292   | CDS,Exon       |
| chr6 | 88255333  | 88273950  | - | Serum_circ_0985 | 10.01 | 18617 | 425  | RARS2    | CDS,Exon       |
| chr6 | 90052042  | 90053475  | - | Serum_circ_0986 | 2.86  | 1433  | 206  | UBE2J1   | CDS,Exon       |
| chr6 | 90461149  | 90463341  | - | Serum_circ_0987 | 1.43  | 2192  | 263  | MDN1     | CDS,Exon       |
| chr6 | 99860426  | 99864304  | - | Serum_circ_0988 | 5.72  | 3878  | 388  | PNISR    | CDS,Exon,5'UTR |
| chr6 | 105280916 | 105291173 | - | Serum_circ_0989 | 1.43  | 10257 | 208  | HACE1    | CDS,Exon,3'UTR |
| chr6 | 108243000 | 108250718 | - | Serum_circ_0990 | 4.29  | 7718  | 328  | SEC63    | CDS,Exon       |
| chr6 | 110428279 | 110448832 | - | Serum_circ_0991 | 2.86  | 20553 | 568  | WASF1    | CDS,Exon,5'UTR |
| chr6 | 111208707 | 111211559 | + | Serum_circ_0992 | 4.29  | 2852  | 317  | AMD1     | CDS,Exon,5'UTR |
| chr6 | 112075636 | 112075880 | - | Serum_circ_0993 | 2.86  | 244   | NA   | FYN      | Intron         |

|      |           |           |   |                 |       |       |      |                   |                |
|------|-----------|-----------|---|-----------------|-------|-------|------|-------------------|----------------|
| chr6 | 127635960 | 127652175 | - | Serum_circ_0994 | 2.86  | 16215 | 499  | ECHDC1            | CDS,Exon,5'UTR |
| chr6 | 129843621 | 129861687 | - | Serum_circ_0995 | 2.86  | 18066 | NA   | NA                | Intergenic     |
| chr6 | 129932677 | 129939997 | - | Serum_circ_0996 | 4.29  | 7320  | 336  | ARHGAP18          | CDS,Exon       |
| chr6 | 131247744 | 131277639 | - | Serum_circ_0997 | 2.14  | 29895 | 824  | EPB41L2           | CDS,Exon,5'UTR |
| chr6 | 131939546 | 131941036 | - | Serum_circ_0998 | 2.14  | 1490  | 183  | MED23             | CDS,Exon       |
| chr6 | 136990420 | 137019820 | - | Serum_circ_0999 | 2.86  | 29400 | 754  | MAP3K5            | CDS,Exon       |
| chr6 | 137015277 | 137019820 | - | Serum_circ_1000 | 15.01 | 4543  | 641  | MAP3K5            | CDS,Exon       |
| chr6 | 143158071 | 143228195 | - | Serum_circ_1001 | 1.43  | 70124 | 113  | HIVEP2            | Exon,5'UTR     |
| chr6 | 144858717 | 144860579 | + | Serum_circ_1002 | 2.14  | 1862  | 286  | UTRN              | CDS,Exon       |
| chr6 | 144858717 | 144864006 | + | Serum_circ_1003 | 3.57  | 5289  | 362  | UTRN              | CDS,Exon       |
| chr6 | 145148746 | 145157074 | + | Serum_circ_1004 | 2.14  | 8328  | 291  | UTRN              | CDS,Exon       |
| chr6 | 147527106 | 147560406 | + | Serum_circ_1005 | 1.43  | 33300 | 281  | STXBP5            | CDS,Exon       |
| chr6 | 147527106 | 147588303 | + | Serum_circ_1006 | 2.86  | 61197 | 564  | STXBP5            | CDS,Exon       |
| chr6 | 149663820 | 149668393 | + | Serum_circ_1007 | 3.57  | 4573  | 149  | TAB2              | Exon,5'UTR     |
| chr6 | 150092297 | 150094305 | + | Serum_circ_1008 | 1.43  | 2008  | 137  | PCMT1             | CDS,Exon       |
| chr6 | 155095122 | 155116273 | + | Serum_circ_1009 | 5.00  | 21151 | 576  | SCAF8             | CDS,Exon       |
| chr6 | 157150360 | 157222659 | + | Serum_circ_1010 | 4.29  | 72299 | 384  | ARID1B            | CDS,Exon       |
| chr6 | 157222509 | 157256710 | + | Serum_circ_1011 | 2.86  | 34201 | 261  | ARID1B            | CDS,Exon       |
| chr6 | 163876310 | 163899928 | + | Serum_circ_1012 | 5.72  | 23618 | 260  | QKI               | CDS,Exon       |
| chr6 | 170159933 | 170168267 | + | Serum_circ_1013 | 1.43  | 8334  | 454  | ERMARD            | CDS,Exon       |
| chr6 | 170626457 | 170639638 | + | Serum_circ_1014 | 2.86  | 13181 | 2038 | FAM120B           | CDS,Exon,5'UTR |
| chr7 | 5680784   | 5681007   | - | Serum_circ_1015 | 7.86  | 223   | 223  | RNF216            | CDS,Exon       |
| chr7 | 5680784   | 5692141   | - | Serum_circ_1016 | 12.15 | 11357 | 321  | RNF216            | CDS,Exon       |
| chr7 | 5756453   | 5760803   | - | Serum_circ_1017 | 2.14  | 4350  | 140  | RNF216            | CDS,Exon       |
| chr7 | 6085701   | 6089676   | - | Serum_circ_1018 | 2.86  | 3975  | 353  | EIF2AK1           | CDS,Exon       |
| chr7 | 6624646   | 6624891   | + | Serum_circ_1019 | 7.86  | 245   | 245  | ZDHHC4            | CDS,Exon       |
| chr7 | 8093146   | 8110761   | + | Serum_circ_1020 | 4.29  | 17615 | 481  | GLCC1             | CDS,Exon       |
| chr7 | 12263851  | 12269445  | + | Serum_circ_1021 | 2.86  | 5594  | 301  | TMEM106B          | CDS,Exon       |
| chr7 | 16298014  | 16317851  | - | Serum_circ_1022 | 2.86  | 19837 | 2315 | ISPD              | CDS,Exon,5'UTR |
| chr7 | 16298014  | 16348252  | - | Serum_circ_1023 | 7.15  | 50238 | 2466 | ISPD              | CDS,Exon,5'UTR |
| chr7 | 17908029  | 17915413  | - | Serum_circ_1024 | 3.57  | 7384  | 397  | SNX13             | CDS,Exon       |
| chr7 | 23163395  | 23183644  | + | Serum_circ_1025 | 4.29  | 20249 | 963  | KLHL7             | CDS,Exon,3'UTR |
| chr7 | 27668989  | 27672045  | - | Serum_circ_1026 | 2.14  | 3056  | 122  | HIBADH            | CDS,Exon       |
| chr7 | 30661008  | 30662078  | + | Serum_circ_1027 | 3.57  | 1070  | 254  | GARS              | CDS,Exon       |
| chr7 | 33644476  | 33646165  | + | Serum_circ_1028 | 2.14  | 1689  | NA   | NA                | Intergenic     |
| chr7 | 35707043  | 35712888  | - | Serum_circ_1029 | 10.01 | 5845  | 347  | HERPUD2           | CDS,Exon       |
| chr7 | 35709824  | 35712888  | - | Serum_circ_1030 | 3.57  | 3064  | 192  | HERPUD2           | CDS,Exon       |
| chr7 | 37136223  | 37172839  | - | Serum_circ_1031 | 1.43  | 36616 | 214  | ELMO1             | CDS,Exon       |
| chr7 | 37896875  | 37916609  | + | Serum_circ_1032 | 7.15  | 19734 | 796  | NME8              | CDS,Exon       |
| chr7 | 40027197  | 40041630  | + | Serum_circ_1033 | 4.29  | 14433 | 1142 | CDK13             | CDS,Exon       |
| chr7 | 50795489  | 50800065  | - | Serum_circ_1034 | 1.43  | 4576  | 82   | GRB10             | CDS,Exon,5'UTR |
| chr7 | 61969420  | 61971117  | - | Serum_circ_1035 | 6.43  | 1697  | NA   | NA                | Intergenic     |
| chr7 | 65751497  | 65751696  | + | Serum_circ_1036 | 7.15  | 199   | 199  | TPST1             | CDS,Exon       |
| chr7 | 65897308  | 65904291  | - | Serum_circ_1037 | 1.43  | 6983  | NA   | TCONS_I2_00026649 | LncRNA         |
| chr7 | 66458203  | 66459328  | - | Serum_circ_1038 | 6.43  | 1125  | 331  | SBDS              | CDS,Exon       |
| chr7 | 73100965  | 73101230  | + | Serum_circ_1039 | 2.86  | 265   | 179  | WBSCR22           | CDS,Exon,5'UTR |
| chr7 | 73778584  | 73803589  | + | Serum_circ_1040 | 1.43  | 25005 | 1401 | CLIP2             | CDS,Exon       |
| chr7 | 76903010  | 76903969  | + | Serum_circ_1041 | 4.29  | 959   | 267  | CCDC146           | CDS,Exon       |
| chr7 | 77016676  | 77035422  | - | Serum_circ_1042 | 2.14  | 18746 | 347  | GSAP              | CDS,Exon       |
| chr7 | 77200394  | 77221573  | + | Serum_circ_1043 | 3.57  | 21179 | 393  | PTPN12            | CDS,Exon,5'UTR |

|      |           |           |   |                 |       |       |      |              |                |
|------|-----------|-----------|---|-----------------|-------|-------|------|--------------|----------------|
| chr7 | 77210743  | 77212967  | + | Serum_circ_1044 | 7.15  | 2224  | 173  | PTPN12       | CDS,Exon,5'UTR |
| chr7 | 77214859  | 77230123  | + | Serum_circ_1045 | 6.43  | 15264 | 314  | PTPN12       | CDS,Exon,5'UTR |
| chr7 | 77265098  | 77268641  | + | Serum_circ_1046 | 1.43  | 3543  | 207  | PTPN12       | CDS,Exon       |
| chr7 | 79186836  | 79186967  | + | Serum_circ_1047 | 3.57  | 131   | NA   | NA           | Intergenic     |
| chr7 | 87593948  | 87607727  | + | Serum_circ_1048 | 1.43  | 13779 | 77   | ADAM22       | CDS,Exon       |
| chr7 | 90355880  | 90377090  | + | Serum_circ_1049 | 1.43  | 21210 | 341  | CDK14        | CDS,Exon,5'UTR |
| chr7 | 98564663  | 98565321  | + | Serum_circ_1050 | 3.57  | 658   | 336  | TRRAP        | CDS,Exon       |
| chr7 | 98985661  | 98985884  | + | Serum_circ_1051 | 2.14  | 223   | 223  | ARPC1B       | CDS,Exon       |
| chr7 | 100410368 | 100410830 | - | Serum_circ_1052 | 5.00  | 462   | 362  | EPHB4        | CDS,Exon       |
| chr7 | 101870646 | 101870949 | + | Serum_circ_1053 | 2.86  | 303   | 303  | CUX1         | CDS,Exon       |
| chr7 | 102039994 | 102047945 | + | Serum_circ_1054 | 3.57  | 7951  | 252  | LOC100630923 | CDS,Exon,5'UTR |
| chr7 | 105108783 | 105111295 | - | Serum_circ_1055 | 1.43  | 2512  | 288  | PUS7         | CDS,Exon       |
| chr7 | 105279933 | 105283568 | - | Serum_circ_1056 | 1.43  | 3635  | 367  | ATXN7L1      | CDS,Exon       |
| chr7 | 115898098 | 115898209 | + | Serum_circ_1057 | 5.72  | 111   | 111  | TES          | Exon,3'UTR     |
| chr7 | 128138089 | 128140331 | + | Serum_circ_1058 | 1.43  | 2242  | 107  | METTL2B      | CDS,Exon       |
| chr7 | 128655032 | 128658211 | - | Serum_circ_1059 | 2.86  | 3179  | 432  | TNPO3        | CDS,Exon,3'UTR |
| chr7 | 129756284 | 129769416 | + | Serum_circ_1060 | 5.00  | 13132 | 866  | KLHDC10      | CDS,Exon       |
| chr7 | 129810239 | 129821559 | - | Serum_circ_1061 | 1.43  | 11320 | 608  | TMEM209      | CDS,Exon       |
| chr7 | 138209985 | 138213975 | + | Serum_circ_1062 | 5.72  | 3990  | 232  | TRIM24       | CDS,Exon       |
| chr7 | 138209985 | 138258387 | + | Serum_circ_1063 | 3.57  | 48402 | 1417 | TRIM24       | CDS,Exon       |
| chr7 | 138252225 | 138258387 | + | Serum_circ_1064 | 5.00  | 6162  | 484  | TRIM24       | CDS,Exon       |
| chr7 | 138738196 | 138738841 | - | Serum_circ_1065 | 2.86  | 645   | 262  | ZC3HAV1      | CDS,Exon       |
| chr7 | 139259873 | 139260722 | - | Serum_circ_1066 | 1.43  | 849   | 161  | HIPK2        | CDS,Exon       |
| chr7 | 148543561 | 148544397 | - | Serum_circ_1067 | 2.14  | 836   | 355  | EZH2         | CDS,Exon,5'UTR |
| chr7 | 151181822 | 151195266 | - | Serum_circ_1068 | 10.01 | 13444 | 140  | RHEB         | CDS,Exon       |
| chr7 | 151946960 | 151948051 | - | Serum_circ_1069 | 2.14  | 1091  | 192  | KMT2C        | CDS,Exon       |
| chr7 | 152007050 | 152012423 | - | Serum_circ_1070 | 9.29  | 5373  | 460  | KMT2C        | CDS,Exon       |
| chr7 | 155465560 | 155473602 | + | Serum_circ_1071 | 7.15  | 8042  | 445  | RBM33        | CDS,Exon       |
| chr7 | 155499553 | 155511137 | + | Serum_circ_1072 | 2.14  | 11584 | 521  | RBM33        | CDS,Exon       |
| chr7 | 156549086 | 156619438 | - | Serum_circ_1073 | 4.29  | 70352 | 578  | LMBR1        | CDS,Exon       |
| chr7 | 158552176 | 158557544 | - | Serum_circ_1074 | 10.01 | 5368  | 495  | ESYT2        | CDS,Exon       |
| chr7 | 158580694 | 158591763 | - | Serum_circ_1075 | 1.43  | 11069 | 417  | ESYT2        | CDS,Exon       |
| chr7 | 158662545 | 158669382 | + | Serum_circ_1076 | 2.86  | 6837  | 558  | WDR60        | CDS,Exon       |
| chr8 | 9916509   | 10014402  | + | Serum_circ_1077 | 1.43  | 97893 | 563  | MSRA         | CDS,Exon,5'UTR |
| chr8 | 17868745  | 17869336  | + | Serum_circ_1078 | 1.43  | 591   | 291  | PCM1         | CDS,Exon       |
| chr8 | 17927300  | 17928899  | - | Serum_circ_1079 | 2.14  | 1599  | 178  | ASAH1        | CDS,Exon       |
| chr8 | 18656804  | 18662408  | - | Serum_circ_1080 | 4.29  | 5604  | 448  | PSD3         | CDS,Exon       |
| chr8 | 21832180  | 21837714  | + | Serum_circ_1081 | 3.57  | 5534  | 465  | XPO7         | CDS,Exon       |
| chr8 | 21929836  | 21931346  | + | Serum_circ_1082 | 6.43  | 1510  | 231  | DMTN         | CDS,Exon       |
| chr8 | 29959413  | 29962002  | + | Serum_circ_1083 | 1.43  | 2589  | 263  | LEPROTL1     | CDS,Exon       |
| chr8 | 30032600  | 30038146  | + | Serum_circ_1084 | 2.14  | 5546  | 386  | DCTN6        | CDS,Exon       |
| chr8 | 30464573  | 30494791  | - | Serum_circ_1085 | 2.86  | 30218 | 477  | GTF2E2       | CDS,Exon       |
| chr8 | 30492548  | 30511119  | - | Serum_circ_1086 | 4.29  | 18571 | 1055 | GTF2E2       | CDS,Exon,5'UTR |
| chr8 | 37623043  | 37623873  | + | Serum_circ_1087 | 16.44 | 830   | 220  | PROSC        | CDS,Exon       |
| chr8 | 42761315  | 42785315  | + | Serum_circ_1088 | 5.00  | 24000 | 210  | HOOK3        | CDS,Exon       |
| chr8 | 42761315  | 42798588  | + | Serum_circ_1089 | 2.14  | 37273 | 343  | HOOK3        | CDS,Exon       |
| chr8 | 46929686  | 46929906  | - | Serum_circ_1090 | 2.86  | 220   | NA   | NA           | Intergenic     |
| chr8 | 48203621  | 48206619  | + | Serum_circ_1091 | 2.86  | 2998  | 269  | SPIDR        | CDS,Exon,5'UTR |
| chr8 | 48869730  | 48869991  | - | Serum_circ_1092 | 2.86  | 261   | 170  | PRKDC        | CDS,Exon       |
| chr8 | 52773404  | 52773806  | - | Serum_circ_1093 | 26.45 | 402   | 402  | PCMTD1       | CDS,Exon,5'UTR |

|      |           |           |   |                 |       |       |      |          |                |
|------|-----------|-----------|---|-----------------|-------|-------|------|----------|----------------|
| chr8 | 56698277  | 56708711  | + | Serum_circ_1094 | 2.14  | 10434 | 1376 | TGS1     | CDS,Exon       |
| chr8 | 56854413  | 56860282  | + | Serum_circ_1095 | 4.29  | 5869  | 363  | LYN      | CDS,Exon,5'UTR |
| chr8 | 61496766  | 61504528  | + | Serum_circ_1096 | 2.86  | 7762  | 288  | RAB2A    | CDS,Exon       |
| chr8 | 61653817  | 61655656  | + | Serum_circ_1097 | 2.14  | 1839  | 1839 | CHD7     | CDS,Exon,5'UTR |
| chr8 | 62489330  | 62531578  | - | Serum_circ_1098 | 2.14  | 42248 | 215  | ASPH     | CDS,Exon       |
| chr8 | 66691954  | 66701216  | - | Serum_circ_1099 | 2.86  | 9262  | 145  | PDE7A    | CDS,Exon       |
| chr8 | 68934270  | 68973014  | + | Serum_circ_1100 | 4.29  | 38744 | 1003 | PREX2    | CDS,Exon       |
| chr8 | 69676649  | 69676773  | - | Serum_circ_1101 | 2.86  | 124   | NA   | C8orf34  | Antisense      |
| chr8 | 71071739  | 71075089  | - | Serum_circ_1102 | 2.14  | 3350  | 292  | NCOA2    | CDS,Exon       |
| chr8 | 71126137  | 71128999  | - | Serum_circ_1103 | 20.73 | 2862  | 278  | NCOA2    | CDS,Exon,5'UTR |
| chr8 | 74585341  | 74601048  | - | Serum_circ_1104 | 15.01 | 15707 | 296  | STAU2    | CDS,Exon,5'UTR |
| chr8 | 81937454  | 81942324  | - | Serum_circ_1105 | 2.14  | 4870  | 94   | PAG1     | Exon,5'UTR     |
| chr8 | 87392954  | 87414432  | + | Serum_circ_1106 | 2.14  | 21478 | 654  | WWP1     | CDS,Exon       |
| chr8 | 90617594  | 90660841  | - | Serum_circ_1107 | 2.86  | 43247 | NA   | NA       | Intergenic     |
| chr8 | 95541297  | 95550574  | - | Serum_circ_1108 | 5.00  | 9277  | 701  | KIAA1429 | CDS,Exon       |
| chr8 | 98698895  | 98703416  | + | Serum_circ_1109 | 2.14  | 4521  | 565  | MTDH     | CDS,Exon       |
| chr8 | 101299728 | 101300495 | - | Serum_circ_1110 | 6.43  | 767   | 767  | RNF19A   | CDS,Exon,5'UTR |
| chr8 | 103372298 | 103373854 | - | Serum_circ_1111 | 2.86  | 1556  | 324  | UBR5     | CDS,Exon       |
| chr8 | 104417003 | 104420012 | - | Serum_circ_1112 | 1.43  | 3009  | 237  | SLC25A32 | CDS,Exon,3'UTR |
| chr8 | 106431371 | 106456609 | + | Serum_circ_1113 | 4.29  | 25238 | 261  | ZFPM2    | CDS,Exon       |
| chr8 | 110424493 | 110439385 | + | Serum_circ_1114 | 5.00  | 14892 | 915  | PKHD1L1  | CDS,Exon       |
| chr8 | 117723559 | 117738411 | - | Serum_circ_1115 | 2.86  | 14852 | 157  | EIF3H    | CDS,Exon       |
| chr8 | 131092147 | 131104389 | - | Serum_circ_1116 | 1.43  | 12242 | 2272 | ASAP1    | CDS,Exon,3'UTR |
| chr8 | 131164981 | 131181313 | - | Serum_circ_1117 | 13.58 | 16332 | 334  | ASAP1    | CDS,Exon       |
| chr8 | 131164981 | 131193126 | - | Serum_circ_1118 | 5.72  | 28145 | 550  | ASAP1    | CDS,Exon       |
| chr8 | 131164981 | 131200429 | - | Serum_circ_1119 | 5.00  | 35448 | 675  | ASAP1    | CDS,Exon       |
| chr8 | 131226801 | 131302384 | - | Serum_circ_1120 | 2.86  | 75583 | 219  | ASAP1    | CDS,Exon       |
| chr8 | 141595217 | 141616013 | - | Serum_circ_1121 | 1.43  | 20796 | 193  | AGO2     | CDS,Exon       |
| chr8 | 141745349 | 141762415 | - | Serum_circ_1122 | 5.72  | 17066 | 698  | PTK2     | CDS,Exon       |
| chr8 | 141799572 | 141829119 | - | Serum_circ_1123 | 2.86  | 29547 | 529  | PTK2     | CDS,Exon       |
| chr8 | 141799572 | 141840625 | - | Serum_circ_1124 | 2.14  | 41053 | 584  | PTK2     | CDS,Exon       |
| chr8 | 141810557 | 141900868 | - | Serum_circ_1125 | 5.00  | 90311 | 1125 | PTK2     | CDS,Exon,5'UTR |
| chr8 | 141828375 | 141874498 | - | Serum_circ_1126 | 4.29  | 46123 | 505  | PTK2     | CDS,Exon       |
| chr8 | 141840570 | 141874498 | - | Serum_circ_1127 | 6.43  | 33928 | 286  | PTK2     | CDS,Exon       |
| chr8 | 141856358 | 141874498 | - | Serum_circ_1128 | 3.57  | 18140 | 231  | PTK2     | CDS,Exon       |
| chr8 | 141856358 | 141931231 | - | Serum_circ_1129 | 2.86  | 74873 | 625  | PTK2     | CDS,Exon,5'UTR |
| chr8 | 142154246 | 142161052 | + | Serum_circ_1130 | 1.43  | 6806  | 232  | DENND3   | CDS,Exon       |
| chr8 | 142154246 | 142176488 | + | Serum_circ_1131 | 3.57  | 22242 | 1130 | DENND3   | CDS,Exon       |
| chr8 | 142170730 | 142173528 | + | Serum_circ_1132 | 4.29  | 2798  | 253  | DENND3   | CDS,Exon       |
| chr8 | 142264087 | 142264728 | - | Serum_circ_1133 | 1.43  | 641   | 641  | SLC45A4  | CDS,Exon,5'UTR |
| chr9 | 2191265   | 2192802   | + | Serum_circ_1134 | 10.72 | 1537  | 143  | SMARCA2  | CDS,Exon       |
| chr9 | 6420911   | 6434173   | + | Serum_circ_1135 | 2.86  | 13262 | 491  | UHRF2    | CDS,Exon,5'UTR |
| chr9 | 6475390   | 6482099   | + | Serum_circ_1136 | 4.29  | 6709  | 529  | UHRF2    | CDS,Exon,5'UTR |
| chr9 | 6880011   | 6893232   | + | Serum_circ_1137 | 7.86  | 13221 | 292  | KDM4C    | CDS,Exon       |
| chr9 | 16727794  | 16738483  | - | Serum_circ_1138 | 3.57  | 10689 | 327  | BNC2     | CDS,Exon       |
| chr9 | 17226200  | 17236586  | + | Serum_circ_1139 | 1.43  | 10386 | 400  | CNTLN    | CDS,Exon       |
| chr9 | 17330629  | 17342442  | + | Serum_circ_1140 | 5.00  | 11813 | 545  | CNTLN    | CDS,Exon       |
| chr9 | 18942054  | 18942173  | - | Serum_circ_1141 | 4.29  | 119   | NA   | FAM154A  | Intron         |
| chr9 | 19286766  | 19305525  | + | Serum_circ_1142 | 2.14  | 18759 | 1182 | DENND4C  | CDS,Exon,5'UTR |
| chr9 | 19288593  | 19290874  | + | Serum_circ_1143 | 1.43  | 2281  | 243  | DENND4C  | CDS,Exon,5'UTR |

|      |           |           |   |                 |       |       |      |           |                |
|------|-----------|-----------|---|-----------------|-------|-------|------|-----------|----------------|
| chr9 | 19305349  | 19316837  | + | Serum_circ_1144 | 2.86  | 11488 | 496  | DENND4C   | CDS,Exon,5'UTR |
| chr9 | 19360241  | 19361961  | + | Serum_circ_1145 | 2.86  | 1720  | 364  | DENND4C   | CDS,Exon,5'UTR |
| chr9 | 20819794  | 20823114  | + | Serum_circ_1146 | 5.00  | 3320  | 465  | FOCAD     | CDS,Exon       |
| chr9 | 20907148  | 20929595  | + | Serum_circ_1147 | 5.72  | 22447 | 692  | FOCAD     | CDS,Exon       |
| chr9 | 27183456  | 27192621  | + | Serum_circ_1148 | 4.29  | 9165  | 594  | TEK       | CDS,Exon       |
| chr9 | 33948371  | 33956144  | - | Serum_circ_1149 | 2.86  | 7773  | 563  | UBAP2     | CDS,Exon,3'UTR |
| chr9 | 33953282  | 33963789  | - | Serum_circ_1150 | 2.14  | 10507 | 377  | UBAP2     | CDS,Exon,5'UTR |
| chr9 | 33986757  | 34017187  | - | Serum_circ_1151 | 4.29  | 30430 | 561  | UBAP2     | CDS,Exon,5'UTR |
| chr9 | 34241182  | 34242106  | + | Serum_circ_1152 | 3.57  | 924   | 924  | UBAP1     | CDS,Exon,5'UTR |
| chr9 | 34286614  | 34290387  | - | Serum_circ_1153 | 2.86  | 3773  | 304  | KIF24     | CDS,Exon       |
| chr9 | 37144631  | 37147442  | + | Serum_circ_1154 | 1.43  | 2811  | NA   | ZCCHC7    | Intron         |
| chr9 | 37424841  | 37426651  | + | Serum_circ_1155 | 3.57  | 1810  | 321  | GRHPR     | CDS,Exon       |
| chr9 | 79244107  | 79251473  | - | Serum_circ_1156 | 1.43  | 7366  | 186  | PRUNE2    | CDS,Exon       |
| chr9 | 79852917  | 79853302  | + | Serum_circ_1157 | 1.43  | 385   | 305  | VPS13A    | CDS,Exon       |
| chr9 | 79968891  | 80022523  | + | Serum_circ_1158 | 7.86  | 25632 | 1730 | VPS13A    | CDS,Exon,3'UTR |
| chr9 | 80409378  | 80412564  | - | Serum_circ_1159 | 11.44 | 3186  | 259  | GNAQ      | CDS,Exon       |
| chr9 | 80869751  | 80879232  | + | Serum_circ_1160 | 1.43  | 9481  | 374  | CEP78     | CDS,Exon       |
| chr9 | 86292641  | 86293514  | - | Serum_circ_1161 | 4.29  | 873   | 394  | UBQLN1    | CDS,Exon       |
| chr9 | 86292641  | 86301070  | - | Serum_circ_1162 | 3.57  | 8429  | 925  | UBQLN1    | CDS,Exon       |
| chr9 | 86293355  | 86301070  | - | Serum_circ_1163 | 5.72  | 7715  | 690  | UBQLN1    | CDS,Exon       |
| chr9 | 88284399  | 88327481  | - | Serum_circ_1164 | 2.14  | 43082 | 695  | AGTPBP1   | CDS,Exon,5'UTR |
| chr9 | 88307603  | 88327481  | - | Serum_circ_1165 | 3.57  | 19878 | 190  | AGTPBP1   | CDS,Exon,5'UTR |
| chr9 | 88918000  | 88919862  | - | Serum_circ_1166 | 2.14  | 1862  | 208  | ZCCHC6    | CDS,Exon       |
| chr9 | 88920106  | 88924932  | - | Serum_circ_1167 | 2.14  | 4826  | 508  | ZCCHC6    | CDS,Exon       |
| chr9 | 92070802  | 92074349  | - | Serum_circ_1168 | 2.14  | 3547  | 66   | SEMA4D    | Exon,5'UTR     |
| chr9 | 96233422  | 96238620  | + | Serum_circ_1169 | 1.43  | 5198  | 330  | FAM120A   | CDS,Exon       |
| chr9 | 96233422  | 96278551  | + | Serum_circ_1170 | 3.57  | 45129 | 1042 | FAM120A   | CDS,Exon       |
| chr9 | 96238537  | 96261168  | + | Serum_circ_1171 | 5.00  | 22631 | 309  | FAM120A   | CDS,Exon       |
| chr9 | 98740342  | 98766983  | + | Serum_circ_1172 | 3.57  | 26641 | 337  | ERCC6L2   | CDS,Exon       |
| chr9 | 111868787 | 111870850 | - | Serum_circ_1173 | 6.43  | 2063  | 220  | TMEM245   | CDS,Exon       |
| chr9 | 114148656 | 114154104 | - | Serum_circ_1174 | 2.86  | 5448  | 435  | KIAA0368  | CDS,Exon       |
| chr9 | 114825216 | 114841004 | - | Serum_circ_1175 | 1.43  | 15788 | 284  | SUSD1     | CDS,Exon       |
| chr9 | 114840817 | 114842445 | - | Serum_circ_1176 | 13.58 | 1628  | 279  | SUSD1     | CDS,Exon       |
| chr9 | 114840817 | 114864565 | - | Serum_circ_1177 | 1.43  | 23748 | 582  | SUSD1     | CDS,Exon       |
| chr9 | 114905750 | 114919893 | - | Serum_circ_1178 | 1.43  | 14143 | 423  | SUSD1     | CDS,Exon       |
| chr9 | 115013208 | 115060196 | - | Serum_circ_1179 | 1.43  | 46988 | 929  | PTBP3     | CDS,Exon,5'UTR |
| chr9 | 124110292 | 124115580 | - | Serum_circ_1180 | 3.57  | 5288  | 650  | STOM      | CDS,Exon,3'UTR |
| chr9 | 126319848 | 126414402 | - | Serum_circ_1181 | 4.29  | 94554 | 486  | DENND1A   | CDS,Exon       |
| chr9 | 130504066 | 130507378 | - | Serum_circ_1182 | 2.86  | 3312  | 824  | SH2D3C    | CDS,Exon       |
| chr9 | 131235191 | 131236020 | + | Serum_circ_1183 | 2.14  | 829   | 262  | ODF2      | CDS,Exon       |
| chr9 | 131271154 | 131277918 | + | Serum_circ_1184 | 1.43  | 6764  | 333  | GLE1      | CDS,Exon       |
| chr9 | 131860291 | 131860929 | - | Serum_circ_1185 | 8.58  | 638   | 379  | CRAT      | CDS,Exon       |
| chr9 | 132740743 | 132741653 | - | Serum_circ_1186 | 1.43  | 910   | 205  | FNBP1     | CDS,Exon       |
| chr9 | 132841908 | 132848755 | + | Serum_circ_1187 | 5.00  | 6847  | 235  | GPR107    | CDS,Exon,5'UTR |
| chrX | 3735585   | 3736541   | - | Serum_circ_1188 | 7.15  | 956   | 59   | LOC389906 | Exon,3'UTR     |
| chrX | 10031484  | 10066619  | + | Serum_circ_1189 | 2.86  | 35135 | 825  | WWC3      | CDS,Exon,5'UTR |
| chrX | 11187624  | 11207104  | - | Serum_circ_1190 | 5.00  | 19480 | 989  | ARHGAP6   | CDS,Exon,3'UTR |
| chrX | 12817325  | 12828265  | + | Serum_circ_1191 | 5.00  | 10940 | 601  | PRPS2     | CDS,Exon       |
| chrX | 16846216  | 16847893  | + | Serum_circ_1192 | 5.72  | 1677  | 366  | TXLNG     | CDS,Exon       |
| chrX | 24905024  | 24906239  | + | Serum_circ_1193 | 4.29  | 1215  | 117  | POLA1     | CDS,Exon       |

|      |           |           |   |                 |      |       |     |                                |                    |
|------|-----------|-----------|---|-----------------|------|-------|-----|--------------------------------|--------------------|
| chrX | 53430497  | 53430825  | - | Serum_circ_1194 | 2.86 | 328   | 224 | SMC1A                          | CDS,Exon           |
| chrX | 53641494  | 53641706  | - | Serum_circ_1195 | 2.14 | 212   | 212 | HUWE1<br>TCONS_I2_00<br>030220 | CDS,Exon<br>LncRNA |
| chrX | 56029257  | 56041394  | + | Serum_circ_1196 | 3.57 | 12137 | NA  |                                |                    |
| chrX | 67494579  | 67518938  | - | Serum_circ_1197 | 2.14 | 24359 | 230 | OPHN1                          | CDS,Exon           |
| chrX | 67731690  | 67742759  | + | Serum_circ_1198 | 2.14 | 11069 | 535 | YIPF6                          | CDS,Exon           |
| chrX | 76812921  | 76814317  | - | Serum_circ_1199 | 6.43 | 1396  | 373 | ATRX                           | CDS,Exon           |
| chrX | 76812921  | 76829823  | - | Serum_circ_1200 | 5.00 | 16902 | 482 | ATRX                           | CDS,Exon           |
| chrX | 76907603  | 76912143  | - | Serum_circ_1201 | 5.72 | 4540  | 437 | ATRX                           | CDS,Exon           |
| chrX | 108861225 | 108861378 | + | Serum_circ_1202 | 2.86 | 153   | NA  | NA                             | Intergenic         |
| chrX | 117575330 | 117577650 | + | Serum_circ_1203 | 1.43 | 2320  | 642 | WDR44                          | CDS,Exon           |
| chrX | 118544152 | 118551603 | + | Serum_circ_1204 | 2.14 | 7451  | 173 | SLC25A43                       | CDS,Exon           |
| chrX | 118774654 | 118787003 | - | Serum_circ_1205 | 3.57 | 12349 | 557 | 6-Sep                          | CDS,Exon,3'UTR     |
| chrX | 119063974 | 119066175 | - | Serum_circ_1206 | 3.57 | 2201  | 226 | NKAP                           | CDS,Exon           |
| chrX | 119670781 | 119675575 | - | Serum_circ_1207 | 2.14 | 4794  | 722 | CUL4B                          | CDS,Exon           |
| chrX | 122163895 | 122164046 | - | Serum_circ_1208 | 2.86 | 151   | NA  | NA                             | Intergenic         |
| chrX | 128692816 | 128692978 | + | Serum_circ_1209 | 4.29 | 162   | 162 | OCRL                           | CDS,Exon           |
| chrX | 130454063 | 130454192 | + | Serum_circ_1210 | 3.57 | 129   | NA  | NA                             | Intergenic         |
| chrX | 132978460 | 132978605 | - | Serum_circ_1211 | 2.14 | 145   | NA  | GPC3                           | Intron             |
| chrX | 138897036 | 138908982 | - | Serum_circ_1212 | 4.29 | 11946 | 399 | ATP11C                         | CDS,Exon           |
| chrX | 154182166 | 154189443 | - | Serum_circ_1213 | 2.14 | 7277  | 460 | F8                             | CDS,Exon           |
| chrY | 13464445  | 13472457  | - | Serum_circ_1214 | 4.29 | 8012  | NA  | NA                             | Intergenic         |
| chrY | 21901413  | 21903743  | - | Serum_circ_1215 | 2.14 | 2330  | 429 | KDM5D                          | CDS,Exon           |

**Supplementary information, Table S2** CRC specific exo-circRNAs with host genes upregulated in CRC tissues

| Chr   | Start     | End       | Strand | circRNA ID         | SRPBM | Genomic length | Spliced length | gene_symbol |
|-------|-----------|-----------|--------|--------------------|-------|----------------|----------------|-------------|
| chr7  | 156619298 | 156629579 | -      | Serum_CRC_circ_001 | 18.04 | 10281          | 371            | LMBR1       |
| chr7  | 156526870 | 156589186 | -      | Serum_CRC_circ_002 | 5.41  | 62316          | 642            | LMBR1       |
| chr7  | 77210743  | 77230123  | +      | Serum_CRC_circ_003 | 7.22  | 19380          | 487            | PTPN12      |
| chr7  | 24663284  | 24708279  | +      | Serum_CRC_circ_004 | 13.53 | 44995          | 1116           | MPP6        |
| chr10 | 13214375  | 13214765  | +      | Serum_CRC_circ_005 | 5.41  | 390            | 246            | MCM10       |
| chr16 | 16218645  | 16219768  | +      | Serum_CRC_circ_006 | 5.41  | 1123           | 229            | ABCC1       |
| chr16 | 16108347  | 16110478  | +      | Serum_CRC_circ_007 | 5.41  | 2131           | 264            | ABCC1       |
| chr10 | 17746429  | 17747740  | +      | Serum_CRC_circ_008 | 5.41  | 1311           | 297            | STAM        |
| chr16 | 22360599  | 22361170  | -      | Serum_CRC_circ_009 | 5.41  | 571            | 314            | CDR2        |
| chr5  | 64747301  | 64769779  | -      | Serum_CRC_circ_010 | 9.02  | 22478          | 1357           | ADAMTS6     |
| chr1  | 23397717  | 23398690  | +      | Serum_CRC_circ_011 | 6.31  | 973            | 209            | KDM1A       |
| chr2  | 54127017  | 54128696  | -      | Serum_CRC_circ_012 | 5.41  | 1679           | 347            | PSME4       |
| chr16 | 66850483  | 66855462  | -      | Serum_CRC_circ_013 | 9.02  | 4979           | 439            | NAE1        |
| chr1  | 212218001 | 212220759 | +      | Serum_CRC_circ_014 | 8.12  | 2758           | 282            | DTL         |
| chr11 | 77336007  | 77336863  | -      | Serum_CRC_circ_015 | 6.31  | 856            | 210            | CLNS1A      |
| chr17 | 5364258   | 5365866   | -      | Serum_CRC_circ_016 | 5.41  | 1608           | 399            | DHX33       |
| chr20 | 35812582  | 35812776  | +      | Serum_CRC_circ_017 | 5.41  | 194            | 194            | RPN2        |



|       |           |           |   |                    |       |       |     |          |
|-------|-----------|-----------|---|--------------------|-------|-------|-----|----------|
| chr9  | 33948371  | 33953472  | - | Serum_CRC_circ_018 | 5.41  | 5101  | 404 | UBAP2    |
| chr9  | 33986757  | 33998862  | - | Serum_CRC_circ_019 | 5.41  | 12105 | 421 | UBAP2    |
| chr19 | 10254441  | 10254663  | - | Serum_CRC_circ_020 | 5.41  | 222   | 222 | DNMT1    |
| chr22 | 26853824  | 26854543  | - | Serum_CRC_circ_021 | 5.41  | 719   | 242 | HPS4     |
| chr5  | 145539936 | 145552337 | - | Serum_CRC_circ_022 | 6.31  | 12401 | 582 | LARS     |
| chr4  | 2933551   | 2933663   | - | Serum_CRC_circ_023 | 5.41  | 112   | 112 | MFS10    |
| chr17 | 30315338  | 30315516  | + | Serum_CRC_circ_024 | 7.22  | 178   | 178 | SUZ12    |
| chr9  | 77631183  | 77632364  | - | Serum_CRC_circ_025 | 7.22  | 1181  | 360 | C9orf41  |
| chr2  | 122514815 | 122519100 | + | Serum_CRC_circ_026 | 8.12  | 4285  | 408 | TSN      |
| chr4  | 54249939  | 54256040  | + | Serum_CRC_circ_027 | 11.73 | 6101  | 169 | FIP1L1   |
| chr15 | 42851536  | 42856055  | + | Serum_CRC_circ_028 | 5.41  | 4519  | 401 | HAUS2    |
| chr4  | 56883813  | 56885721  | + | Serum_CRC_circ_029 | 10.82 | 1908  | 413 | CEP135   |
| chr3  | 3182193   | 3186394   | + | Serum_CRC_circ_030 | 8.12  | 4201  | 266 | TRNT1    |
| chr7  | 91924202  | 91936970  | + | Serum_CRC_circ_031 | 9.02  | 12768 | 576 | ANKIB1   |
| chr7  | 91974291  | 91981956  | + | Serum_CRC_circ_032 | 10.82 | 7665  | 401 | ANKIB1   |
| chr6  | 17665469  | 17669259  | - | Serum_CRC_circ_033 | 6.31  | 3790  | 201 | NUP153   |
| chr2  | 191759877 | 191769893 | + | Serum_CRC_circ_034 | 5.41  | 10016 | 593 | GLS      |
| chr8  | 141771263 | 141774389 | - | Serum_CRC_circ_035 | 5.41  | 3126  | 176 | PTK2     |
| chr8  | 141889569 | 141900868 | - | Serum_CRC_circ_036 | 6.31  | 11299 | 394 | PTK2     |
| chr6  | 129932677 | 129937448 | - | Serum_CRC_circ_037 | 9.92  | 4771  | 170 | ARHGAP18 |
| chr2  | 32312560  | 32314674  | + | Serum_CRC_circ_038 | 7.22  | 2114  | 171 | SPAST    |
| chr20 | 18523662  | 18535034  | + | Serum_CRC_circ_039 | 8.12  | 11372 | 637 | SEC23B   |
| chr1  | 62907158  | 62907970  | + | Serum_CRC_circ_040 | 13.53 | 812   | 226 | USP1     |
| chr2  | 172782046 | 172809519 | + | Serum_CRC_circ_041 | 9.02  | 27473 | 302 | HAT1     |
| chr13 | 50279756  | 50280508  | - | Serum_CRC_circ_042 | 5.41  | 752   | 340 | KPNA3    |
| chr1  | 150198939 | 150201570 | - | Serum_CRC_circ_043 | 8.12  | 2631  | 354 | ANP32E   |
| chr14 | 100728640 | 100728803 | + | Serum_CRC_circ_044 | 6.31  | 163   | 163 | YY1      |
| chr3  | 155551256 | 155560408 | - | Serum_CRC_circ_045 | 6.31  | 9152  | 491 | SLC33A1  |
| chr5  | 140961878 | 140963182 | - | Serum_CRC_circ_046 | 9.92  | 1304  | 282 | DIAPH1   |
| chr2  | 179981394 | 179982340 | - | Serum_CRC_circ_047 | 5.41  | 946   | 205 | SESTD1   |
| chr7  | 129760588 | 129762042 | + | Serum_CRC_circ_048 | 9.92  | 1454  | 304 | KLHDC10  |
| chr10 | 32309949  | 32310215  | - | Serum_CRC_circ_049 | 13.53 | 266   | 172 | KIF5B    |
| chr12 | 14609494  | 14610229  | + | Serum_CRC_circ_050 | 8.12  | 735   | 163 | ATF7IP   |
| chr3  | 32574477  | 32578596  | - | Serum_CRC_circ_051 | 6.31  | 4119  | 342 | DYNC1L1  |
| chr8  | 42725146  | 42729149  | - | Serum_CRC_circ_052 | 5.41  | 4003  | 185 | RNF170   |
| chr12 | 111947352 | 111948386 | - | Serum_CRC_circ_053 | 6.31  | 1034  | 377 | ATXN2    |

**Supplementary information, Table S3** Primers sequences for real time PCR

|         | Circular/Linear                         | Forward primer(5'-3')   | Reverse primer(5'-3') |
|---------|-----------------------------------------|-------------------------|-----------------------|
| XPO1    | Circular (chr2:61,749,745-61,761,038)   | CCAAGGAACCAAGTGCAG      | GAAATCAAGCAGCTGACGA   |
| EZH2    | Circular (chr7:148,543,561-148,544,397) | TGGAAACAGCGAAGGATAC     | TCGTCTGAACCTCTTGAGC   |
| FOXK2   | Circular (chr17:80,521,229-80,526,077)  | TAATGGCTGACAACCTCACA    | GCTTCTCTCTCTCTCGCT    |
| CAMSAP1 | Circular (chr9:138,773,478-138,774,924) | AGTGCCTCGAAAGAAGCTTC    | TCCTGCTCATACTGGTCAA   |
| RTN4    | Circular (chr2:55,209,650-55,214,834)   | AGTAATTCTGCTCTTGTC      | GTCTTCTTAATGTCTCTCC   |
| MET     | Circular (chr7:116,339,124-116,340,338) | AATGTGAGATGTCTCCAGCAT   | TAAACAGGAGCACGAGGAT   |
| CDYL    | Circular (chr6:4,891,946-4,892,613)     | CTTAGCTGTTAACGGGAAA     | CTGTTGAAGTCGTGGATGT   |
| HIPK3   | Circular (chr11:33,307,958-33,309,057)  | CAACATATCTACAATCTCGGTAC | ACAACTGCTTGGCTCTACT   |
| GSE1    | Circular (chr16:85,667,519-85,667,738)  | GCCAAACAGGCGGAGGAGC     | CCTGGTCGCGGTGGAAAGC   |
| N4BP2L2 | Circular (chr13:33,091,993-33,101,669)  | CAAAGACCTCCTCTCCAC      | AACATTATACCTGTACCCATC |
| SMARCA5 | Circular (chr4:144,464,661-144,465,125) | CTCCAAGATGGGCGAAAGT     | TTCTGATCCACAAGCCTCC   |
| KLHDC10 | Circular (chr7:129,760,588-129,762,042) | CAGACCTGCACAAGTTAGA     | CCAAATGGGATGCCCGTAC   |
| XPO1    | Linear                                  | TGATCCACAGATGGTCGCTG    | GGTTCTTAGCAGCTGGGAC   |
| EZH2    | Linear                                  | TGCGACTGAGACAGCTCAAG    | TGGTCACCGAACACTCCCTA  |
| FOXK2   | Linear                                  | TAACGTTCACTGCCCTGTCC    | GTTTGCAGCGCTGATGGTTC  |
| SLC22A3 | Linear                                  | TCCCCAACTGGCAAGGAATC    | ACTCAGGGACCACCCAGTAA  |
| CAMSAP1 | Linear                                  | AAGGCTGTACAGGCACTAC     | CGCTGATCAGGATGTCTCTC  |
| RTN4    | Linear                                  | GAACTCAGGCGCCTCTTCTT    | CTATCTGTGCCTGATGCCGT  |
| MET     | Linear                                  | GTCCTGCAGTCAATGCCTCT    | GTCAGCCTTGTCCCTCCTTC  |
| CDYL    | Linear                                  | CTCGTGCAATCCAGTTGTGC    | ACCTCACACTCCCTCTCGTT  |
| HIPK3   | Linear                                  | TGGAGACTGGGGGAAGATGA    | CACACTAACTGGCTGAGGGG  |
| Actin   | Linear                                  | TTGTTACAGGAAGTCCCTTGCC  | ATGCTATCACCTCCCTGTGTG |
